# Supplementary material
Source: PubMed Central journal article supplement (PMC2874749)
Supplement: NIHMS194006-supplement-Supplemental_Data.pdf [file NIHMS194006-supplement-Supplemental_Data.pdf]

## Supplementary materials

### Mouse Aorta Smooth Muscle Cells Differentiate Into *Lymphoid Tissue Organizer-like* Cells Upon Combined TNFR1/LT $\beta$ R NF- $\kappa$ B Signaling

Lötzer et al.

**Assays. qRT-PCR.** qRT-PCR was performed as described using primers as reported in the supplement<sup>1</sup>. Forward and reverse primers were:

*Actb*, 5'GCTCCATCCTGGCCTCACTGT, 3'GAAAGGGTGTAACACGCAGCTCA (136 bp);  
*Ccl21*, 5'ATCCCCGGCAATCCTGTTCTT, 3'AGTTCTCTTGACCCCTTGG (201 bp);  
*Cxcl13*, 5'TCCTGGGAAGCTGGTGCAATG, 3'TCATCAGGGTCACAGTGCAAAGG (216 bp);  
*Ccl2*, 5'CAGCACCAGCACCAGCCAAC, 3'CAGCTTCTTTGGGACACCTGCTG (245 bp);  
*Cx3cl1*, 5'CAGATGGCTTCCCCTGTGTTCT, 3'AAGGTGAGTCCTTGGCGTGAAC (269 bp);  
*Cxcl10*, 5'TCCATCACTCCCCTTTACCCAGT, 3'CGTCGCACCTCCACATAGCTTA (238 bp);  
*Cxcl13*, 5'TCCTGGGAAGCTGGTGCAATG, 3'TCATCAGGGTCACAGTGCAAAGG (216 bp);  
*Cxcl16*, 5'AGAATTGGCTGGATGTCGGCTA, 3'GGGTGCCAGAAGAAATGGTACG (195 bp);  
*Ccl19*, 5'CCCATCCCTGGGAACATCGTG, 3'CACAGGGCTCCTTCTGGTGCTG (201 bp);  
*Vcam1*, 5'ACACCATCCGCCAGGCACAG, 3'TCCCGATGGCAGGTATTACCAAGG (186 bp).

*Actb* served as the internal control. **EMSA, Western blotting.** For EMSA or Western blot analyses preparation of nuclear extracts and EMSAs were essentially performed as described<sup>2</sup>. Briefly, whole-cell extracts were prepared by lysis of SMCs in Laemmli buffer. For Western blotting proteins were separated by 10% SDS-PAGE and transferred onto PVDF membranes. Membranes were blocked and incubated with antibodies against p100/p52, RelA, RelB, I $\kappa$ B $\alpha$ , actin, and polymerase II (Santa Cruz Biotechnology). Immunoreactive bands were visualized by ECL (GE Healthcare). **Migration assay.** Migration of total splenocytes was performed by Guo et al.<sup>2</sup>. In brief, 10<sup>6</sup> blood cell-depleted spleen cells in 100  $\mu$ l of DMEM-F12, 1 % FCS were loaded into the upper chamber of Transwell 24-plates, 6,5 mm diameter (Corning Costar Corp.). The bottom chamber was loaded with 600  $\mu$ l of SMC supernatants as described in Methods and Figure legends. After 3 h at 37<sup>o</sup> C, cells were harvested from the bottom chamber and counted, then stained with CD-19FITC (BD Pharmingen), CD11b-RPE (Mac1; Serotec) and CD3-APC (Serotec) for FACS analysis. B cells, T cells, and monocytes/macrophages/DCs were gated from the lymphocyte gate.

**Microarray analyses.** SMCs were stimulated for the indicated periods of time with agonists or a combination of both. Mouse whole genome 430 2.0 microarrays were prepared from mouse aorta SMCs cultured as described in Methods from total RNA (integrity determined bioanalyzer electrophoresis, Agilent Technologies) as described previously<sup>1</sup>. Microarray data (Fig.2; supplementary TableS2) were analyzed using Affymetrix Gene Chip Operating Software. Signal intensities were calculated from the raw data and scaled to an array trimmed mean of 500. All further steps were performed using R and Bioconductor as described by Gräbner et al. 2009<sup>1</sup>. Logarithmized signals were normalized across arrays using quantile normalization. Distinct filter criteria and statistical tests have been employed to obtain the results reported in Fig.2, Fig.S2, Fig.S3, and Fig.S5 as listed below. Fig.2: Data were filtered prior to statistical analyses to remove genes with low expression or without significant changes between control and agonist-stimulated groups for up-regulation or down-regulation. Up-regulation: Probe sets were included if in the combined agonist group (TNF +  $\alpha$ -LT $\beta$ R) a minimum of 2 arrays was called present (detection p value P $\leq$ 0.05) and 2 or 3 arrays showed a log signal  $\geq$ log<sub>2</sub>(200). Recorded genes were required to be up-regulated from the control group to the combined agonist group with a fold change of at least log<sub>2</sub> (2.0). Down-regulation: Probe sets were included if in the control group a minimum of 2 arrays was called

present (detection  $p$  value  $P \leq 0.05$ ) and 2 or 3 arrays showed a log signal  $\geq \log_2(200)$ . Recorded genes were required to be down-regulated from the control group to the combined agonist group with a foldchange of at least  $\log_2(2.0)$ . Using the data from the four experimental groups, the resulting up-list or down-list was subjected to a one-factor analysis of variance (ANOVA) with Benjamini and Hochberg correction for multiple testing. The resulting up-regulated probe set list contains 248 probe sets divided in TNF >  $\alpha$ -LT $\beta$ R (161 probe sets),  $\alpha$ -LT $\beta$ R > TNF (47 Probe sets) and TNF plus  $\alpha$ -LT $\beta$ R hyperinduction (40 probe sets); the resulting down-regulated probe set list contains 8 probe sets (Table SIII). Fig.S2: Regarding MA-plots probe sets were included if one of 2 arrays (TNF vs. control;  $\alpha$ -LT $\beta$ R vs. control) was called present (detection  $P \leq 0.05$ ) with log signal  $\geq \log_2(200)$ . Recorded probe sets were required to show a fold change of at least  $\log_2(2.0)$  (up-, down-regulation) (Table SI). Fig.S3: 3 separate filters were applied: TNF vs. control, LT $\beta$ R vs. control, and TNF plus LT $\beta$ R vs. control. For filtering probe sets were included if a minimum of 2 arrays was called present (detection  $P \leq 0.05$ ) and 2 or 3 arrays showed a log signal  $\geq \log_2(200)$ . Recorded probe sets were required to be up-regulated vs. control with a fold change of at least  $\log_2(2.0)$  and with  $P \leq 0.05$  of Student t-Test with Benjamini and Hochberg correction for multiple testing (Table SII). Fig.S5: 2 separate filters were applied: SMC vs. control and EC vs. control. For filtering probe sets were included if a minimum of 2 arrays was called present (detection  $P \leq 0.05$ ) and 2 or 3 arrays showed a log signal  $\geq \log_2(200)$ . Recorded probe sets were required to be up-regulated vs. control with a fold change of at least  $\log_2(2.0)$  (Table SIV).

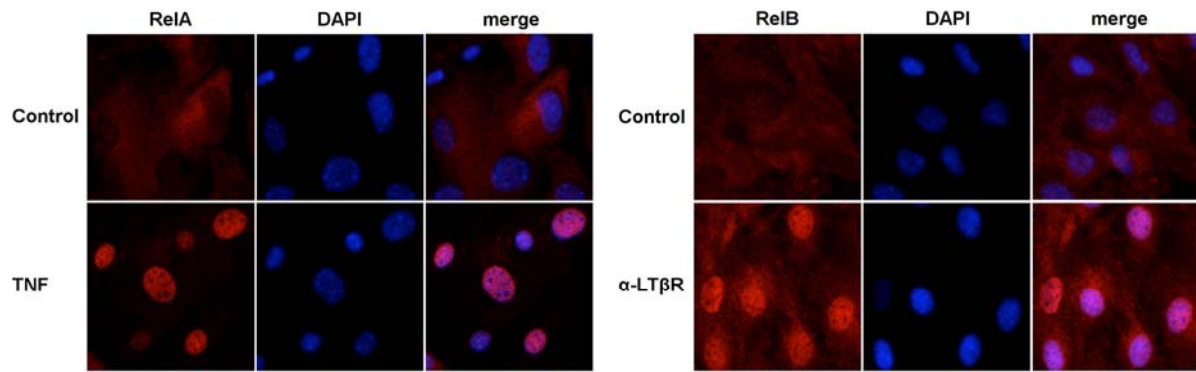

**Fig.S1. RelA and RelB nuclear translocation by TNF and  $\alpha$ -LT $\beta$ R.** SMCs were cultured and agonists were added as described in Fig.1. 24 h later, RelA and RelB fluorescence immunohistochemistry was analyzed as described previously using specific antisera (Santa Cruz Biotechnology).

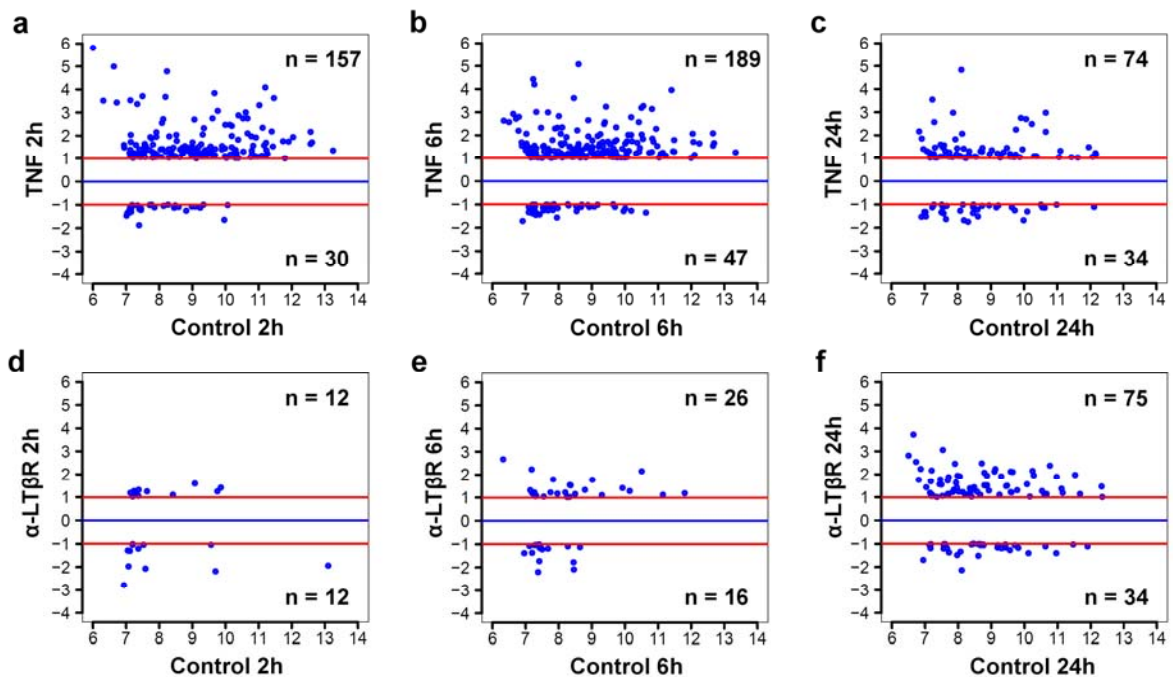

**Fig.S2. TNF- and  $\alpha$ -LT $\beta$ R-induced mRNAs follow distinct kinetics.** Microarrays were prepared after stimulation of SMCs with TNF (upper 3 MA plots) or  $\alpha$ -LT $\beta$ R (lower 3 MA plots) at 2h (a,d), 6h (b,e), and 24h (c,f). The number of up- and down-regulated probe sets is indicated and individual probe sets are shown in Table S1. X-axis:  $\{\log_2(\text{TNF or } \alpha\text{-LT}\beta\text{R}) + \log_2(\text{control})\}/2$ ; Y-axis:  $\log_2(\text{foldchange})$  of up- or down-regulation *versus* unstimulated SMCs.

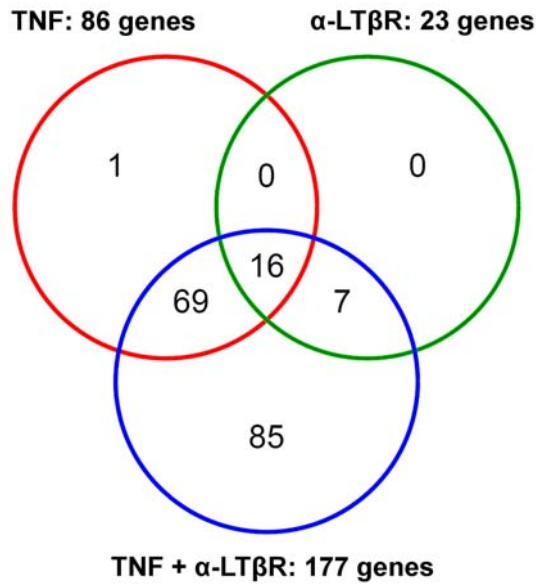

**Fig.S3. SMC mRNAs induced by TNF,  $\alpha$ -LT $\beta$ R, and TNF +  $\alpha$ -LT $\beta$ R at 24h reveals transcription cross-talk and recruitment of newly induced genes.** Cross-talk of TNF and  $\alpha$ -LT $\beta$ R-regulated genes show distinct and shared transcription patterns. Genes were annotated to probe sets with the highest signal intensity on the array; detection p value was set  $\leq 0.05$ ; expression level  $\geq 200$ ; foldchange 2fold; Student T-test  $P \leq 0.05$ . TNF stimulated 86 genes;  $\alpha$ -LT $\beta$ R stimulated 23 genes, TNF +  $\alpha$ -LT $\beta$ R stimulated 177 genes.

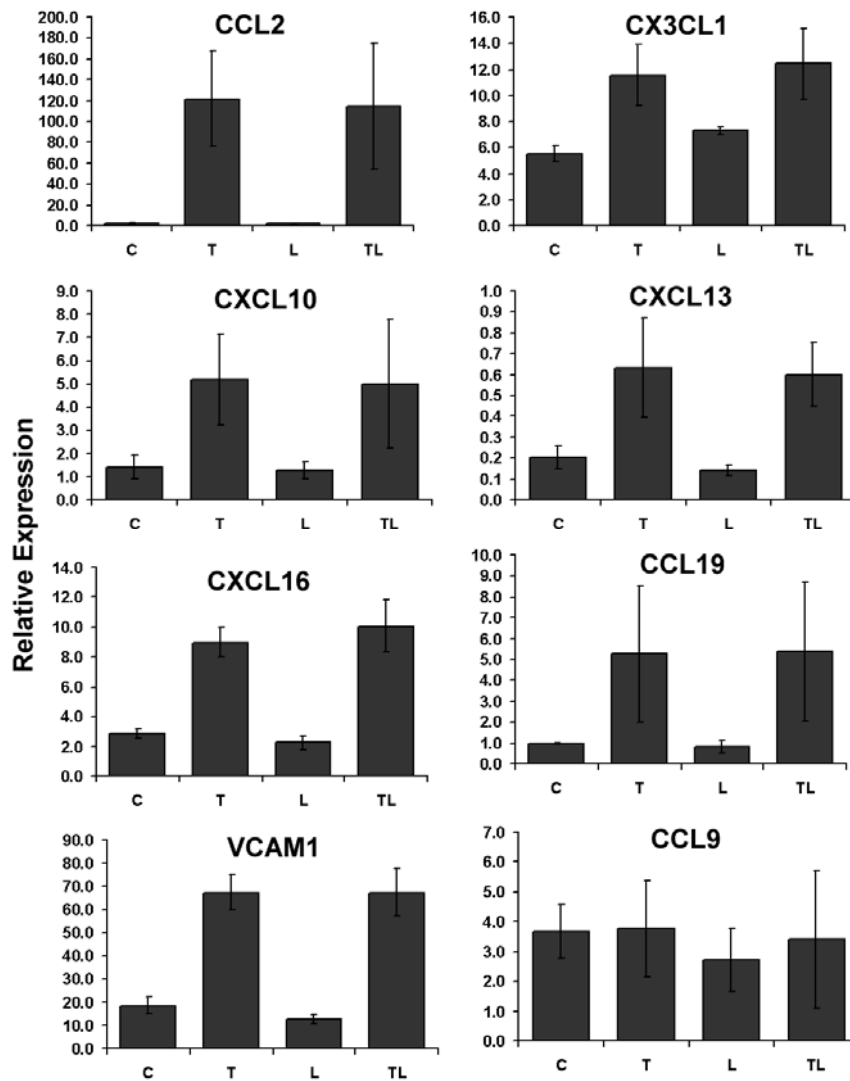

**Fig.S4. SMCs of *ltbr*<sup>-/-</sup> mice fail to show hyperinduction of lymphorganogenic chemokines and VCAM-1.** SMCs from *ltbr*<sup>-/-</sup> mice were prepared and stimulated with TNF, α-LTβR, or TNF + α-LTβR as described in Fig. 1. 24 hours later, qRT-PCR analyses were performed for mRNAs as indicated. Data represent means of three independent SMC preparations ± SEM. None of the measurements yielded a statistically significant difference between SMC receiving TNF or TNF + α-LTβR.

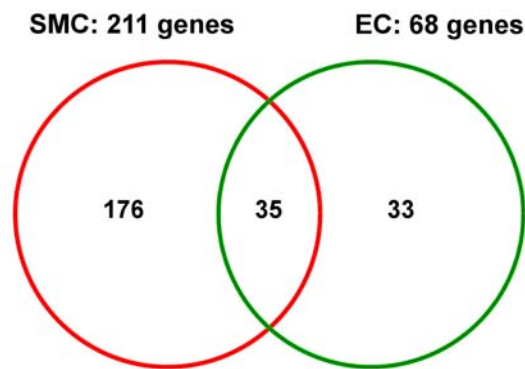

**Fig.S5. Differential gene induction in aorta SMCs and aorta endothelial cells and 24 h after addition of TNF +  $\alpha$ -LT $\beta$ R.** Aorta SMCs and aorta endothelial cells (ECs) were cultured and agonists added as described in Fig.1 and in Methods. Microarrays were prepared and differential gene induction in cells was determined as described in Methods.

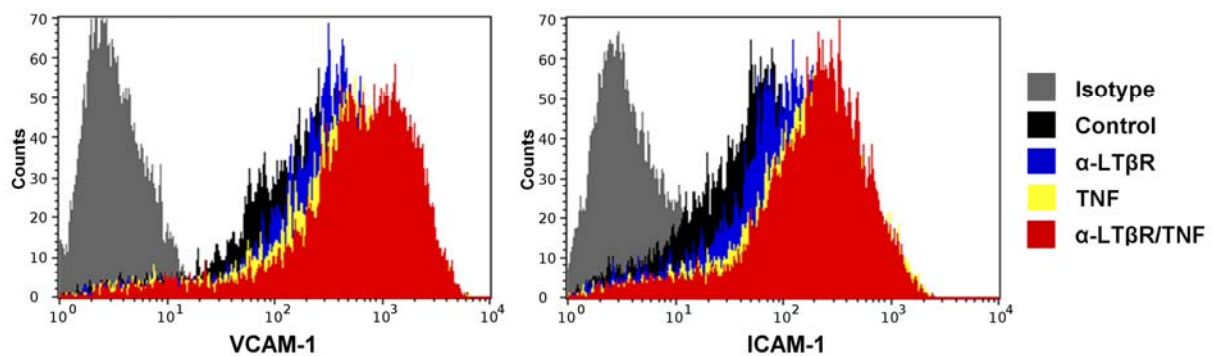

**Fig.S6. VCAM-1 and ICAM-1 FACS analyses of cultured SMCs.** SMCs were cultured and stimulated for 24 h with TNF (0,5 ng/ml),  $\alpha$ -LT $\beta$ R (1  $\mu$ g/ml) or both as described in Fig. 1. SMCs were harvested and single cell suspension was resuspended in PBS containing FCS (5%) at a density of  $10^5$  cells/100  $\mu$ l. Cells were incubated with FITC-conjugated antibodies against VCAM-1, ICAM-1 (both from eBioscience), or isotype control antibodies (rat IgG2a and IgG2b; Pharmingen) for 30 min at 4°C, washed twice and analyzed on a FACSCalibur (BD). Left: Expression of VCAM-1; right: ICAM-1. Mean fluorescence intensities for VCAM-1 were: Control 435, TNF 796,  $\alpha$ -LT $\beta$ R 562, TNF +  $\alpha$ -LT $\beta$ R 941; for ICAM-1: Control 86, TNF 270,  $\alpha$ -LT $\beta$ R 159, TNF +  $\alpha$ -LT $\beta$ R 290. Each histogram represents data of  $10^4$  cells.

**Table SI. TNF- and  $\alpha$ -LT $\beta$ R-regulated probe sets at 2, 6, and 24h.** Microarrays were prepared as described in Fig. S2 and regulated probe sets were determined as described in Methods. Gene symbols and gene names are indicated for ease of reading. **(a)** TNF at 2h; **(b)** TNF at 6h; **(c)** TNF at 24h; **(d)**  $\alpha$ -LT $\beta$ R at 2h; **(e)**  $\alpha$ -LT $\beta$ R at 6h; **(f)**  $\alpha$ -LT $\beta$ R at 24h.

**Table SI.a. TNF-regulated probe sets at 2h.**

| Affymetrix<br>Probe set ID | Gene symbol   | Gene name                                                                                | Entrez<br>Gene ID | Control | TNF  | Fold change<br>TNF / Control |
|----------------------------|---------------|------------------------------------------------------------------------------------------|-------------------|---------|------|------------------------------|
| 1422029_at                 | Ccl20         | chemokine (C-C motif) ligand 20                                                          | 20297             | 9       | 478  | 55.83                        |
| 1447927_at                 | Mpa2l         | macrophage activation 2 like                                                             | 100702            | 18      | 559  | 31.76                        |
| 1421228_at                 | Ccl7          | chemokine (C-C motif) ligand 7                                                           | 20306             | 57      | 1580 | 27.55                        |
| 1420380_at                 | Ccl2          | chemokine (C-C motif) ligand 2                                                           | 20296             | 573     | 9696 | 16.92                        |
| 1458299_s_at               | Nfkbie        | nuclear factor of kappa light polypeptide gene<br>enhancer in B-cells inhibitor, epsilon | 18037             | 216     | 3070 | 14.21                        |
| 1426063_a_at               | Gem           | GTP binding protein (gene overexpressed in skeletal<br>muscle)                           | 14579             | 50      | 653  | 13.09                        |
| 1431843_a_at               | Nfkbie        | nuclear factor of kappa light polypeptide gene<br>enhancer in B-cells inhibitor, epsilon | 18037             | 82      | 1042 | 12.76                        |
| 1421712_at                 | Sele          | selectin, endothelial cell                                                               | 20339             | 802     | 9930 | 12.37                        |
| 1438796_at                 | Nr4a3         | nuclear receptor subfamily 4, group A, member 3                                          | 18124             | 41      | 476  | 11.51                        |
| 1438676_at                 | Mpa2l         | macrophage activation 2 like                                                             | 100702            | 23      | 268  | 11.42                        |
| 1419534_at                 | Olr1          | oxidized low density lipoprotein (lectin-like)<br>receptor 1                             | 108078            | 32      | 346  | 10.78                        |
| 1449984_at                 | Cxcl2         | chemokine (C-X-C motif) ligand 2                                                         | 20310             | 50      | 518  | 10.29                        |
| 1438855_x_at               | Tnfaip2       | tumor necrosis factor, alpha-induced protein 2                                           | 21928             | 660     | 6560 | 9.94                         |
| 1421392_a_at               | Birc3         | baculoviral IAP repeat-containing 3                                                      | 11796             | 300     | 2521 | 8.39                         |
| 1436003_at                 | Vcam1         | vascular cell adhesion molecule 1                                                        | 22329             | 554     | 4448 | 8.03                         |
| 1419132_at                 | Tlr2          | toll-like receptor 2                                                                     | 24088             | 495     | 3636 | 7.34                         |
| 1433699_at                 | Tnfaip3       | tumor necrosis factor, alpha-induced protein 3                                           | 21929             | 627     | 4197 | 6.69                         |
| 1416273_at                 | Tnfaip2       | tumor necrosis factor, alpha-induced protein 2                                           | 21928             | 302     | 2014 | 6.68                         |
| 1452418_at                 | 1200016E24Rik | RIKEN cDNA 1200016E24 gene                                                               | 319202            | 573     | 3820 | 6.67                         |
| 1418930_at                 | Cxcl10        | chemokine (C-X-C motif) ligand 10                                                        | 15945             | 109     | 712  | 6.54                         |
| 1417856_at                 | Relb          | avian reticuloendotheliosis viral (v-rel) oncogene<br>related B                          | 19698             | 211     | 1359 | 6.45                         |
| 1450004_at                 | Tslp          | thymic stromal lymphopoietin                                                             | 53603             | 112     | 653  | 5.82                         |
| 1435906_x_at               | Gbp2          | guanylate nucleotide binding protein 2                                                   | 14469             | 475     | 2641 | 5.56                         |
| 1418240_at                 | Gbp2          | guanylate nucleotide binding protein 2                                                   | 14469             | 434     | 2393 | 5.52                         |
| 1453228_at                 | Stx11         | syntaxin 11                                                                              | 74732             | 507     | 2711 | 5.35                         |

| Affymetrix<br>Probe set ID | Gene symbol   | Gene name                                                                      | Entrez<br>Gene ID | Control | TNF   | Fold change<br>TNF / Control |
|----------------------------|---------------|--------------------------------------------------------------------------------|-------------------|---------|-------|------------------------------|
| 1453238_s_at               | 1200016E24Rik | RIKEN cDNA 1200016E24 gene                                                     | 319202            | 990     | 5006  | 5.05                         |
| 1449009_at                 | Tgtp          | T-cell specific GTPase                                                         | 21822             | 292     | 1464  | 5.02                         |
| 1448306_at                 | Nfkbia        | nuclear factor of kappa light chain gene enhancer in B-cells inhibitor, alpha  | 18035             | 1276    | 5737  | 4.50                         |
| 1415989_at                 | Vcam1         | vascular cell adhesion molecule 1                                              | 22329             | 2873    | 12892 | 4.49                         |
| 1436002_at                 | C230013L11Rik | RIKEN cDNA C230013L11 gene                                                     | 319712            | 115     | 505   | 4.41                         |
| 1421236_at                 | Ripk2         | receptor (TNFRSF)-interacting serine-threonine kinase 2                        | 192656            | 787     | 3348  | 4.25                         |
| 1457780_at                 | Stx11         | syntaxin 11                                                                    | 74732             | 313     | 1285  | 4.10                         |
| 1449227_at                 | Ch25h         | cholesterol 25-hydroxylase                                                     | 12642             | 70      | 286   | 4.10                         |
| 1425761_a_at               | Nfatc1        | nuclear factor of activated T-cells, cytoplasmic, calcineurin-dependent 1      | 18018             | 181     | 736   | 4.06                         |
| 1435137_s_at               | 1200016E24Rik | RIKEN cDNA 1200016E24 gene                                                     | 319202            | 589     | 2329  | 3.95                         |
| 1418854_at                 | Birc2         | baculoviral IAP repeat-containing 2                                            | 11797             | 893     | 3477  | 3.90                         |
| 1450829_at                 | Tnfaip3       | tumor necrosis factor, alpha-induced protein 3                                 | 21929             | 160     | 623   | 3.89                         |
| 1430752_at                 | C330006D17Rik | RIKEN cDNA C330006D17 gene                                                     | 77616             | 123     | 472   | 3.84                         |
| 1427736_a_at               | Ccrl2         | chemokine (C-C motif) receptor-like 2                                          | 54199             | 109     | 415   | 3.82                         |
| 1449731_s_at               | Nfkbia        | nuclear factor of kappa light chain gene enhancer in B-cells inhibitor, alpha  | 18035             | 2169    | 8235  | 3.80                         |
| 1455197_at                 | Rnd1          | Rho family GTPase 1                                                            | 223881            | 998     | 3781  | 3.79                         |
| 1451564_at                 | Parp14        | poly (ADP-ribose) polymerase family, member 14                                 | 547253            | 114     | 418   | 3.66                         |
| 1425837_a_at               | Ccrn4l        | CCR4 carbon catabolite repression 4-like (S. cerevisiae)                       | 12457             | 708     | 2501  | 3.53                         |
| 1456126_at                 | Malt1         | mucosa associated lymphoid tissue lymphoma translocation gene 1                | 240354            | 200     | 685   | 3.42                         |
| 1450173_at                 | Ripk2         | receptor (TNFRSF)-interacting serine-threonine kinase 2                        | 192656            | 1869    | 6261  | 3.35                         |
| 1451314_a_at               | Vcam1         | vascular cell adhesion molecule 1                                              | 22329             | 2099    | 6992  | 3.33                         |
| 1447084_at                 | Nfatc1        | nuclear factor of activated T-cells, cytoplasmic, calcineurin-dependent 1      | 18018             | 78      | 257   | 3.30                         |
| 1424067_at                 | Icam1         | intercellular adhesion molecule                                                | 15894             | 3474    | 11364 | 3.27                         |
| 1425902_a_at               | Nfkb2         | nuclear factor of kappa light polypeptide gene enhancer in B-cells 2, p49/p100 | 18034             | 285     | 927   | 3.25                         |
| 1457644_s_at               | Cxcl1         | chemokine (C-X-C motif) ligand 1                                               | 14825             | 1337    | 4282  | 3.20                         |
| 1438157_s_at               | Nfkbia        | nuclear factor of kappa light chain gene enhancer in B-cells inhibitor, alpha  | 18035             | 3447    | 10756 | 3.12                         |
| 1438027_at                 | 5830443L24Rik | RIKEN cDNA 5830443L24 gene                                                     | 76074             | 107     | 334   | 3.11                         |



| Affymetrix<br>Probe set ID | Gene symbol   | Gene name                                                                                | Entrez<br>Gene ID | Control | TNF  | Fold change<br>TNF / Control |
|----------------------------|---------------|------------------------------------------------------------------------------------------|-------------------|---------|------|------------------------------|
| 1454884_at                 | Zbtb46        | zinc finger and BTB domain containing 46                                                 | 72147             | 351     | 1078 | 3.07                         |
| 1460231_at                 | Irf5          | interferon regulatory factor 5                                                           | 27056             | 128     | 392  | 3.06                         |
| 1419208_at                 | Map3k8        | mitogen activated protein kinase kinase kinase 8                                         | 26410             | 71      | 213  | 3.02                         |
| 1438658_a_at               | Edg3          | endothelial differentiation, sphingolipid G-protein-coupled receptor, 3                  | 13610             | 91      | 273  | 3.01                         |
| 1427932_s_at               | 1200016E24Rik | RIKEN cDNA 1200016E24 gene                                                               | 319202            | 1328    | 3970 | 2.99                         |
| 1417292_at                 | Ifi47         | interferon gamma inducible protein 47                                                    | 15953             | 1066    | 3124 | 2.93                         |
| 1440169_x_at               | Ifnar2        | interferon (alpha and beta) receptor 2                                                   | 15976             | 557     | 1627 | 2.92                         |
| 1454857_at                 | Rnf122        | ring finger protein 122                                                                  | 68867             | 113     | 330  | 2.92                         |
| 1450297_at                 | Il6           | interleukin 6                                                                            | 16193             | 258     | 747  | 2.89                         |
| 1419209_at                 | Cxcl1         | chemokine (C-X-C motif) ligand 1                                                         | 14825             | 1631    | 4704 | 2.88                         |
| 1418580_at                 | Rtp4          | receptor transporter protein 4                                                           | 67775             | 442     | 1267 | 2.87                         |
| 1458455_at                 | Abra          | actin-binding Rho activating protein                                                     | 223513            | 345     | 982  | 2.85                         |
| 1422962_a_at               | Psmb8         | proteasome (prosome, macropain) subunit, beta type 8 (large multifunctional peptidase 7) | 16913             | 111     | 316  | 2.84                         |
| 1422742_at                 | Hivep1        | human immunodeficiency virus type I enhancer binding protein 1                           | 110521            | 695     | 1953 | 2.81                         |
| 1427747_a_at               | Lcn2          | lipocalin 2                                                                              | 16819             | 289     | 805  | 2.79                         |
| 1420089_at                 | Nfkbia        | nuclear factor of kappa light chain gene enhancer in B-cells inhibitor, alpha            | 18035             | 250     | 695  | 2.78                         |
| 1434380_at                 | Gbp6          | guanylate binding protein 6                                                              | 229900            | 308     | 853  | 2.77                         |
| 1450672_a_at               | Trex1         | three prime repair exonuclease 1                                                         | 22040             | 207     | 574  | 2.77                         |
| 1450165_at                 | Slfn2         | schlafen 2                                                                               | 20556             | 74      | 205  | 2.77                         |
| 1434432_at                 | Rffl          | ring finger and FYVE like domain containing protein                                      | 67338             | 613     | 1664 | 2.72                         |
| 1434322_at                 | Micall2       | MICAL-like 2                                                                             | 231830            | 278     | 747  | 2.69                         |
| 1418392_a_at               | Gbp3          | guanylate nucleotide binding protein 3                                                   | 55932             | 330     | 889  | 2.69                         |
| 1449591_at                 | Casp4         | caspase 4, apoptosis-related cysteine peptidase                                          | 12363             | 507     | 1347 | 2.66                         |
| 1421207_at                 | Lif           | leukemia inhibitory factor                                                               | 16878             | 192     | 511  | 2.66                         |
| 1457662_x_at               | Tpk1          | thiamine pyrophosphokinase                                                               | 29807             | 168     | 444  | 2.64                         |
| 1418133_at                 | Bcl3          | B-cell leukemia/lymphoma 3                                                               | 12051             | 104     | 274  | 2.63                         |
| 1417621_at                 | Nfatc1        | nuclear factor of activated T-cells, cytoplasmic, calcineurin-dependent 1                | 18018             | 440     | 1157 | 2.63                         |
| 1439965_at                 |               |                                                                                          |                   | 246     | 645  | 2.62                         |
| 1418421_at                 | Bcl6b         | B-cell CLL/lymphoma 6, member B                                                          | 12029             | 314     | 823  | 2.62                         |
| 1436329_at                 | Egr3          | early growth response 3                                                                  | 13655             | 587     | 1534 | 2.61                         |
| 1422573_at                 | Ampd3         | AMP deaminase 3                                                                          | 11717             | 163     | 426  | 2.61                         |
| 1419714_at                 | Cd274         | CD274 antigen                                                                            | 60533             | 87      | 226  | 2.61                         |

| Affymetrix<br>Probe set ID | Gene symbol | Gene name                                                                         | Entrez<br>Gene ID | Control | TNF   | Fold change<br>TNF / Control |
|----------------------------|-------------|-----------------------------------------------------------------------------------|-------------------|---------|-------|------------------------------|
| 1456572_x_at               | Cct4        | chaperonin subunit 4 (delta)                                                      | 12464             | 129     | 335   | 2.60                         |
| 1448436_a_at               | Irf1        | interferon regulatory factor 1                                                    | 16362             | 788     | 2037  | 2.59                         |
| 1458802_at                 | Hivep3      | human immunodeficiency virus type I enhancer<br>binding protein 3                 | 16656             | 1498    | 3868  | 2.58                         |
| 1417045_at                 | Bid         | BH3 interacting domain death agonist                                              | 12122             | 417     | 1069  | 2.56                         |
| 1448162_at                 | Vcam1       | vascular cell adhesion molecule 1                                                 | 22329             | 6112    | 15560 | 2.55                         |
| 1440831_at                 | Bach1       | BTB and CNC homology 1                                                            | 12013             | 1118    | 2832  | 2.53                         |
| 1432478_a_at               | Ibrdc3      | IBR domain containing 3                                                           | 75234             | 295     | 742   | 2.51                         |
| 1418077_at                 | Trim21      | tripartite motif protein 21                                                       | 20821             | 209     | 521   | 2.49                         |
| 1448632_at                 | Psmb10      | proteasome (prosome, macropain) subunit, beta type<br>10                          | 19171             | 363     | 899   | 2.48                         |
| 1415803_at                 | Cx3cl1      | chemokine (C-X3-C motif) ligand 1                                                 | 20312             | 949     | 2341  | 2.47                         |
| 1448940_at                 | Trim21      | tripartite motif protein 21                                                       | 20821             | 340     | 835   | 2.45                         |
| 1429549_at                 | Col27a1     | procollagen, type XXVII, alpha 1                                                  | 373864            | 187     | 458   | 2.45                         |
| 1434762_at                 | Tmem142b    | transmembrane protein 142B                                                        | 269717            | 208     | 508   | 2.44                         |
| 1429005_at                 | Mfhas1      | malignant fibrous histiocytoma amplified sequence 1                               | 52065             | 796     | 1935  | 2.43                         |
| 1455271_at                 | LOC620695   | hypothetical protein LOC620695                                                    | 620695            | 266     | 646   | 2.43                         |
| 1422397_a_at               | Il15ra      | interleukin 15 receptor, alpha chain                                              | 16169             | 143     | 346   | 2.42                         |
| 1451340_at                 | Arid5a      | AT rich interactive domain 5A (Mrf1 like)                                         | 214855            | 317     | 767   | 2.42                         |
| 1427683_at                 | Egr2        | early growth response 2                                                           | 13654             | 121     | 292   | 2.41                         |
| 1453101_at                 | Klhl25      | kelch-like 25 (Drosophila)                                                        | 207952            | 417     | 997   | 2.39                         |
| 1457167_at                 | Med14       | mediator complex subunit 14                                                       | 26896             | 89      | 212   | 2.37                         |
| 1428479_at                 | Nfatc1      | nuclear factor of activated T-cells, cytoplasmic,<br>calcineurin-dependent 1      | 18018             | 494     | 1167  | 2.36                         |
| 1416725_at                 | Tcf4        | transcription factor 4                                                            | 21413             | 99      | 233   | 2.35                         |
| 1435208_at                 | Dtx3l       | deltex 3-like (Drosophila)                                                        | 209200            | 487     | 1139  | 2.34                         |
| 1436196_at                 | C030046G05  | hypothetical protein C030046G05                                                   | 327885            | 275     | 643   | 2.34                         |
| 1419043_a_at               | Iigp1       | interferon inducible GTPase 1                                                     | 60440             | 416     | 966   | 2.32                         |
| 1428396_at                 | Smurf1      | SMAD specific E3 ubiquitin protein ligase 1                                       | 75788             | 155     | 358   | 2.32                         |
| 1447085_s_at               | Nfatc1      | nuclear factor of activated T-cells, cytoplasmic,<br>calcineurin-dependent 1      | 18018             | 118     | 272   | 2.31                         |
| 1416129_at                 | Errfi1      | ERBB receptor feedback inhibitor 1                                                | 74155             | 851     | 1966  | 2.31                         |
| 1436555_at                 | Slc7a2      | solute carrier family 7 (cationic amino acid<br>transporter, y+ system), member 2 | 11988             | 1177    | 2710  | 2.30                         |
| 1418666_at                 | Ptx3        | pentraxin related gene                                                            | 19288             | 1625    | 3738  | 2.3                          |
| 1449028_at                 | Rhou        | ras homolog gene family, member U                                                 | 69581             | 276     | 635   | 2.3                          |
| 1424194_at                 | Rcsd1       | RCSD domain containing 1                                                          | 226594            | 482     | 1100  | 2.28                         |

| Affymetrix<br>Probe set ID | Gene symbol   | Gene name                                                                                                              | Entrez<br>Gene ID | Control | TNF  | Fold change<br>TNF / Control |
|----------------------------|---------------|------------------------------------------------------------------------------------------------------------------------|-------------------|---------|------|------------------------------|
| 1434433_x_at               | Wdr61         | WD repeat domain 61                                                                                                    | 66317             | 93      | 212  | 2.28                         |
| 1435226_at                 | Ibrdc3        | IBR domain containing 3                                                                                                | 75234             | 369     | 838  | 2.27                         |
| 1417487_at                 | Fosl1         | fos-like antigen 1                                                                                                     | 14283             | 405     | 913  | 2.26                         |
| 1437490_x_at               | Uap1          | UDP-N-acetylglucosamine pyrophosphorylase 1                                                                            | 107652            | 756     | 1703 | 2.25                         |
| 1420591_at                 | Gpr84         | G protein-coupled receptor 84                                                                                          | 80910             | 97      | 218  | 2.24                         |
| 1426501_a_at               | T2bp          | Traf2 binding protein                                                                                                  | 211550            | 373     | 834  | 2.24                         |
| 1457404_at                 | Nfkbiz        | nuclear factor of kappa light polypeptide gene<br>enhancer in B-cells inhibitor, zeta                                  | 80859             | 164     | 365  | 2.23                         |
| 1446850_at                 | Ppap2b        | phosphatidic acid phosphatase type 2B                                                                                  | 67916             | 111     | 247  | 2.22                         |
| 1435015_at                 | Zfp787        | zinc finger protein 787                                                                                                | 67109             | 118     | 261  | 2.21                         |
| 1431035_at                 | Daam1         | dishevelled associated activator of morphogenesis 1                                                                    | 208846            | 165     | 362  | 2.20                         |
| 1429692_s_at               | Gch1          | GTP cyclohydrolase 1                                                                                                   | 14528             | 556     | 1222 | 2.20                         |
| 1431874_at                 | 4931429L15Rik | RIKEN cDNA 4931429L15 gene                                                                                             | 74361             | 116     | 253  | 2.17                         |
| 1427689_a_at               | Tnip1         | TNFAIP3 interacting protein 1                                                                                          | 57783             | 1617    | 3509 | 2.17                         |
| 1460251_at                 | Fas           | Fas (TNF receptor superfamily member)                                                                                  | 14102             | 1490    | 3233 | 2.17                         |
| 1448898_at                 | Ccl9          | chemokine (C-C motif) ligand 9                                                                                         | 20308             | 341     | 739  | 2.17                         |
| 1424942_a_at               | Myc           | myelocytomatosis oncogene                                                                                              | 17869             | 541     | 1167 | 2.16                         |
| 1441855_x_at               | Cxcl1         | chemokine (C-X-C motif) ligand 1                                                                                       | 14825             | 1632    | 3507 | 2.15                         |
| 1452163_at                 | Ets1          | E26 avian leukemia oncogene 1, 5' domain                                                                               | 23871             | 1303    | 2797 | 2.15                         |
| 1460462_at                 | Med18         | mediator of RNA polymerase II transcription,<br>subunit 18 homolog (yeast)                                             | 67219             | 246     | 525  | 2.14                         |
| 1455678_at                 | Sema4b        | sema domain, immunoglobulin domain (Ig),<br>transmembrane domain (TM) and short cytoplasmic<br>domain, (semaphorin) 4B | 20352             | 225     | 480  | 2.14                         |
| 1417936_at                 | Ccl9          | chemokine (C-C motif) ligand 9                                                                                         | 20308             | 692     | 1477 | 2.14                         |
| 1456981_at                 | Tmc7          | transmembrane channel-like gene family 7                                                                               | 209760            | 96      | 204  | 2.13                         |
| 1419816_s_at               | Errfi1        | ERBB receptor feedback inhibitor 1                                                                                     | 74155             | 548     | 1160 | 2.12                         |
| 1449168_a_at               | Akap2         | A kinase (PRKA) anchor protein 2                                                                                       | 11641             | 464     | 981  | 2.12                         |
| 1456212_x_at               | Socs3         | suppressor of cytokine signaling 3                                                                                     | 12702             | 424     | 893  | 2.11                         |
| 1418825_at                 | Irgm          | immunity-related GTPase family, M                                                                                      | 15944             | 1395    | 2920 | 2.09                         |
| 1420275_at                 |               |                                                                                                                        |                   | 185     | 387  | 2.09                         |
| 1447838_x_at               | Eml4          | echinoderm microtubule associated protein like 4                                                                       | 78798             | 120     | 251  | 2.08                         |
| 1433453_a_at               | Abtb2         | ankyrin repeat and BTB (POZ) domain containing 2                                                                       | 99382             | 1204    | 2506 | 2.08                         |
| 1432712_at                 | 4933425M03Rik | RIKEN cDNA 4933425M03 gene                                                                                             | 71190             | 164     | 342  | 2.08                         |
| 1438097_at                 | Rab20         | RAB20, member RAS oncogene family                                                                                      | 19332             | 132     | 274  | 2.08                         |
| 1417483_at                 | Nfkbiz        | nuclear factor of kappa light polypeptide gene<br>enhancer in B-cells inhibitor, zeta                                  | 80859             | 729     | 1508 | 2.07                         |

| Affymetrix<br>Probe set ID | Gene symbol   | Gene name                                                 | Entrez<br>Gene ID | Control | TNF  | Fold change<br>TNF / Control |
|----------------------------|---------------|-----------------------------------------------------------|-------------------|---------|------|------------------------------|
| 1434763_at                 | Tmem142b      | transmembrane protein 142B                                | 269717            | 274     | 566  | 2.06                         |
| 1424392_at                 | Adhfe1        | alcohol dehydrogenase, iron containing, 1                 | 76187             | 155     | 320  | 2.06                         |
| 1455034_at                 | Nr4a2         | nuclear receptor subfamily 4, group A, member 2           | 18227             | 219     | 447  | 2.04                         |
| 1457146_at                 | Dock4         | dedicator of cytokinesis 4                                | 238130            | 103     | 210  | 2.03                         |
| 1418401_a_at               | Dusp16        | dual specificity phosphatase 16                           | 70686             | 943     | 1908 | 2.02                         |
| 1422612_at                 | Hk2           | hexokinase 2                                              | 15277             | 888     | 1796 | 2.02                         |
| 1438081_at                 | Mcc           | mutated in colorectal cancers                             | 328949            | 737     | 1485 | 2.01                         |
| 1450295_s_at               | Pvr           | poliovirus receptor                                       | 52118             | 392     | 789  | 2.01                         |
| 1416067_at                 | Ifrd1         | interferon-related developmental regulator 1              | 15982             | 2511    | 5047 | 2.01                         |
| 1457980_x_at               | Uck2          | uridine-cytidine kinase 2                                 | 80914             | 918     | 458  | -2.00                        |
| 1457966_at                 | Fbxl7         | F-box and leucine-rich repeat protein 7                   | 448987            | 309     | 154  | -2.00                        |
| 1424797_a_at               | Pitx2         | paired-like homeodomain transcription factor 2            | 18741             | 437     | 218  | -2.01                        |
| 1439076_at                 | Dhx29         | DEAH (Asp-Glu-Ala-His) box polypeptide 29                 | 218629            | 206     | 102  | -2.03                        |
| 1453586_at                 | Entpd1        | ectonucleoside triphosphate diphosphohydrolase 1          | 12495             | 299     | 147  | -2.03                        |
| 1422537_a_at               | Id2           | inhibitor of DNA binding 2                                | 15902             | 1532    | 755  | -2.03                        |
| 1437507_at                 | Gatad2b       | GATA zinc finger domain containing 2B                     | 229542            | 511     | 251  | -2.04                        |
| 1427862_at                 | Arl6ip3       | ADP-ribosylation factor-like 6 interacting protein 3      | 65104             | 210     | 103  | -2.04                        |
| 1453064_at                 | Etaa1         | Ewing's tumor-associated antigen 1                        | 68145             | 233     | 114  | -2.04                        |
| 1433801_at                 | 9930012K11Rik | RIKEN cDNA 9930012K11 gene                                | 268759            | 404     | 195  | -2.07                        |
| 1435279_at                 | BC059842      | cDNA sequence BC059842                                    | 230676            | 207     | 98   | -2.11                        |
| 1451538_at                 | Sox9          | SRY-box containing gene 9                                 | 20682             | 790     | 374  | -2.11                        |
| 1449863_a_at               | Dlx5          | distal-less homeobox 5                                    | 13395             | 738     | 349  | -2.11                        |
| 1452249_at                 | Prickle1      | prickle like 1 (Drosophila)                               | 106042            | 563     | 263  | -2.14                        |
| 1439477_at                 | 5430406J06Rik | RIKEN cDNA 5430406J06 gene                                | 73848             | 340     | 158  | -2.16                        |
| 1433691_at                 | Ppp1r3c       | protein phosphatase 1, regulatory (inhibitor) subunit 3C  | 53412             | 893     | 408  | -2.19                        |
| 1425631_at                 | Ppp1r3c       | protein phosphatase 1, regulatory (inhibitor) subunit 3C  | 53412             | 519     | 236  | -2.20                        |
| 1416797_at                 | Nck2          | non-catalytic region of tyrosine kinase adaptor protein 2 | 17974             | 206     | 94   | -2.20                        |
| 1444777_at                 | Rai14         | retinoic acid induced 14                                  | 75646             | 261     | 117  | -2.23                        |
| 1436590_at                 | Ppp1r3b       | protein phosphatase 1, regulatory (inhibitor) subunit 3B  | 244416            | 214     | 95   | -2.25                        |
| 1433462_a_at               | Pi4k2a        | phosphatidylinositol 4-kinase type 2 alpha                | 84095             | 256     | 112  | -2.29                        |
| 1433792_at                 | Nrip2         | nuclear receptor interacting protein 2                    | 60345             | 267     | 115  | -2.33                        |
| 1425099_a_at               | Arntl         | aryl hydrocarbon receptor nuclear translocator-like       | 11865             | 699     | 291  | -2.40                        |
| 1436187_at                 | 1110054M08Rik | RIKEN cDNA 1110054M08 gene                                | 68841             | 212     | 88   | -2.40                        |

| <b>Affymetrix<br/>Probe set ID</b> | <b>Gene symbol</b> | <b>Gene name</b>                                                              | <b>Entrez<br/>Gene ID</b> | <b>Control</b> | <b>TNF</b> | <b>Fold change<br/>TNF / Control</b> |
|------------------------------------|--------------------|-------------------------------------------------------------------------------|---------------------------|----------------|------------|--------------------------------------|
| 1427560_at                         | Six5               | sine oculis-related homeobox 5 homolog<br>(Drosophila)                        | 20475                     | 223            | 90         | -2.47                                |
| 1417154_at                         | Slc25a14           | solute carrier family 25 (mitochondrial carrier,<br>brain), member 14         | 20523                     | 218            | 86         | -2.54                                |
| 1439352_at                         | Trim7              | tripartite motif protein 7                                                    | 94089                     | 211            | 82         | -2.57                                |
| 1426995_a_at                       | Gfer               | growth factor, erv1 (S. cerevisiae)-like (augmenter of<br>liver regeneration) | 11692                     | 215            | 77         | -2.78                                |
| 1454791_a_at                       | Rbbp4              | retinoblastoma binding protein 4                                              | 19646                     | 1771           | 567        | -3.13                                |
| 1438406_at                         | Scarf2             | scavenger receptor class F, member 2                                          | 224024                    | 321            | 88         | -3.66                                |

**Table SI.b. TNF-regulated probe sets at 6h.**

| Affymetrix<br>Probe set ID | Gene symbol   | Gene name                                                                                | Entrez<br>Gene ID | Control | TNF   | Fold change<br>TNF / Control |
|----------------------------|---------------|------------------------------------------------------------------------------------------|-------------------|---------|-------|------------------------------|
| 1421228_at                 | Ccl7          | chemokine (C-C motif) ligand 7                                                           | 20306             | 67      | 2252  | 33.57                        |
| 1418126_at                 | Ccl5          | chemokine (C-C motif) ligand 5                                                           | 20304             | 32      | 695   | 21.45                        |
| 1447927_at                 | Mpa2l         | macrophage activation 2 like                                                             | 100702            | 36      | 656   | 18.26                        |
| 1420380_at                 | Ccl2          | chemokine (C-C motif) ligand 2                                                           | 20296             | 692     | 10658 | 15.41                        |
| 1418930_at                 | Cxcl10        | chemokine (C-X-C motif) ligand 10                                                        | 15945             | 101     | 1224  | 12.17                        |
| 1435906_x_at               | Gbp2          | guanylate nucleotide binding protein 2                                                   | 14469             | 486     | 4659  | 9.59                         |
| 1449009_at                 | Tgtp          | T-cell specific GTPase                                                                   | 21822             | 225     | 2116  | 9.39                         |
| 1418240_at                 | Gbp2          | guanylate nucleotide binding protein 2                                                   | 14469             | 479     | 4374  | 9.13                         |
| 1436003_at                 | Vcam1         | vascular cell adhesion molecule 1                                                        | 22329             | 610     | 5345  | 8.76                         |
| 1450696_at                 | Psmb9         | proteasome (prosome, macropain) subunit, beta type 9 (large multifunctional peptidase 2) | 16912             | 57      | 453   | 7.98                         |
| 1448881_at                 | Hp            | haptoglobin                                                                              | 15439             | 73      | 575   | 7.91                         |
| 1450484_a_at               | Tyki          | thymidylate kinase family LPS-inducible member                                           | 22169             | 36      | 271   | 7.55                         |
| 1422962_a_at               | Psmb8         | proteasome (prosome, macropain) subunit, beta type 8 (large multifunctional peptidase 7) | 16913             | 97      | 688   | 7.12                         |
| 1438676_at                 | Mpa2l         | macrophage activation 2 like                                                             | 100702            | 42      | 292   | 6.91                         |
| 1419132_at                 | Tlr2          | toll-like receptor 2                                                                     | 24088             | 447     | 3051  | 6.82                         |
| 1436058_at                 | Rsad2         | radical S-adenosyl methionine domain containing 2                                        | 58185             | 41      | 269   | 6.58                         |
| 1458299_s_at               | Nfkbie        | nuclear factor of kappa light polypeptide gene enhancer in B-cells inhibitor, epsilon    | 18037             | 190     | 1190  | 6.27                         |
| 1434015_at                 | Slc2a6        | solute carrier family 2 (facilitated glucose transporter), member 6                      | 227659            | 33      | 201   | 6.16                         |
| 1450783_at                 | Ifit1         | interferon-induced protein with tetratricopeptide repeats 1                              | 15957             | 277     | 1644  | 5.95                         |
| 1449984_at                 | Cxcl2         | chemokine (C-X-C motif) ligand 2                                                         | 20310             | 37      | 220   | 5.92                         |
| 1452418_at                 | 1200016E24Rik | RIKEN cDNA 1200016E24 gene                                                               | 319202            | 565     | 3324  | 5.89                         |
| 1421392_a_at               | Birc3         | baculoviral IAP repeat-containing 3                                                      | 11796             | 281     | 1564  | 5.57                         |
| 1448632_at                 | Psmb10        | proteasome (prosome, macropain) subunit, beta type 10                                    | 19171             | 377     | 1913  | 5.08                         |
| 1450829_at                 | Tnfaip3       | tumor necrosis factor, alpha-induced protein 3                                           | 21929             | 123     | 617   | 5.03                         |
| 1450004_at                 | Tslp          | thymic stromal lymphopoietin                                                             | 53603             | 111     | 558   | 5.01                         |
| 1438027_at                 | 5830443L24Rik | RIKEN cDNA 5830443L24 gene                                                               | 76074             | 79      | 395   | 4.98                         |
| 1453196_a_at               | Oasl2         | 2'-5' oligoadenylate synthetase-like 2                                                   | 23962             | 107     | 522   | 4.86                         |
| 1453238_s_at               | 1200016E24Rik | RIKEN cDNA 1200016E24 gene                                                               | 319202            | 897     | 4341  | 4.84                         |
| 1436002_at                 | C230013L11Rik | RIKEN cDNA C230013L11 gene                                                               | 319712            | 175     | 811   | 4.64                         |
| 1449227_at                 | Ch25h         | cholesterol 25-hydroxylase                                                               | 12642             | 52      | 236   | 4.56                         |

| Affymetrix<br>Probe set ID | Gene symbol   | Gene name                                                                                | Entrez<br>Gene ID | Control | TNF   | Fold change<br>TNF / Control |
|----------------------------|---------------|------------------------------------------------------------------------------------------|-------------------|---------|-------|------------------------------|
| 1415989_at                 | Vcam1         | vascular cell adhesion molecule 1                                                        | 22329             | 3149    | 13285 | 4.22                         |
| 1451314_a_at               | Vcam1         | vascular cell adhesion molecule 1                                                        | 22329             | 2072    | 8666  | 4.18                         |
| 1431843_a_at               | Nfkbie        | nuclear factor of kappa light polypeptide gene<br>enhancer in B-cells inhibitor, epsilon | 18037             | 131     | 544   | 4.15                         |
| 1421074_at                 | Cyp7b1        | cytochrome P450, family 7, subfamily b, polypeptide<br>1                                 | 13123             | 64      | 266   | 4.15                         |
| 1419042_at                 | Iigp1         | interferon inducible GTPase 1                                                            | 60440             | 301     | 1246  | 4.13                         |
| 1433699_at                 | Tnfaip3       | tumor necrosis factor, alpha-induced protein 3                                           | 21929             | 723     | 2935  | 4.06                         |
| 1418580_at                 | Rtp4          | receptor transporter protein 4                                                           | 67775             | 547     | 2206  | 4.03                         |
| 1427746_x_at               | H2-K1         | histocompatibility 2, K1, K region                                                       | 14972             | 581     | 2332  | 4.01                         |
| 1427747_a_at               | Lcn2          | lipocalin 2                                                                              | 16819             | 293     | 1146  | 3.91                         |
| 1417856_at                 | Relb          | avian reticuloendotheliosis viral (v-rel) oncogene<br>related B                          | 19698             | 243     | 931   | 3.84                         |
| 1460197_a_at               | Steap4        | STEAP family member 4                                                                    | 117167            | 155     | 585   | 3.78                         |
| 1415803_at                 | Cx3cl1        | chemokine (C-X3-C motif) ligand 1                                                        | 20312             | 961     | 3451  | 3.59                         |
| 1421712_at                 | Sele          | selectin, endothelial cell                                                               | 20339             | 792     | 2826  | 3.57                         |
| 1449591_at                 | Casp4         | caspase 4, apoptosis-related cysteine peptidase                                          | 12363             | 461     | 1594  | 3.46                         |
| 1423017_a_at               | Il1rn         | interleukin 1 receptor antagonist                                                        | 16181             | 121     | 417   | 3.45                         |
| 1448306_at                 | Nfkbia        | nuclear factor of kappa light chain gene enhancer in<br>B-cells inhibitor, alpha         | 18035             | 1543    | 5317  | 3.45                         |
| 1425902_a_at               | Nfkb2         | nuclear factor of kappa light polypeptide gene<br>enhancer in B-cells 2, p49/p100        | 18034             | 281     | 952   | 3.39                         |
| 1419043_a_at               | Iigp1         | interferon inducible GTPase 1                                                            | 60440             | 587     | 1956  | 3.33                         |
| 1435137_s_at               | 1200016E24Rik | RIKEN cDNA 1200016E24 gene                                                               | 319202            | 653     | 2167  | 3.32                         |
| 1418392_a_at               | Gbp3          | guanylate nucleotide binding protein 3                                                   | 55932             | 454     | 1501  | 3.30                         |
| 1417292_at                 | Ifi47         | interferon gamma inducible protein 47                                                    | 15953             | 1025    | 3365  | 3.28                         |
| 1426276_at                 | Ifih1         | interferon induced with helicase C domain 1                                              | 71586             | 397     | 1301  | 3.28                         |
| 1449731_s_at               | Nfkbia        | nuclear factor of kappa light chain gene enhancer in<br>B-cells inhibitor, alpha         | 18035             | 2379    | 7723  | 3.25                         |
| 1448898_at                 | Ccl9          | chemokine (C-C motif) ligand 9                                                           | 20308             | 356     | 1156  | 3.25                         |
| 1435640_x_at               | A130040M12Rik | RIKEN cDNA A130040M12 gene                                                               | 319269            | 66      | 211   | 3.20                         |
| 1449025_at                 | Ifit3         | interferon-induced protein with tetratricopeptide<br>repeats 3                           | 15959             | 742     | 2368  | 3.19                         |
| 1424067_at                 | Icam1         | intercellular adhesion molecule                                                          | 15894             | 3717    | 11749 | 3.16                         |
| 1451564_at                 | Parp14        | poly (ADP-ribose) polymerase family, member 14                                           | 547253            | 163     | 512   | 3.13                         |
| 1419082_at                 | Serpib2       | serine (or cysteine) peptidase inhibitor, clade B,<br>member 2                           | 18788             | 74      | 231   | 3.12                         |

| Affymetrix<br>Probe set ID | Gene symbol   | Gene name                                                                     | Entrez<br>Gene ID | Control | TNF   | Fold change<br>TNF / Control |
|----------------------------|---------------|-------------------------------------------------------------------------------|-------------------|---------|-------|------------------------------|
| 1426324_at                 | H2-D1         | histocompatibility 2, D region locus 1                                        | 14964             | 152     | 472   | 3.11                         |
| 1428942_at                 | Mt2           | metallothionein 2                                                             | 17750             | 2757    | 8575  | 3.11                         |
| 1438855_x_at               | Tnfaip2       | tumor necrosis factor, alpha-induced protein 2                                | 21928             | 586     | 1821  | 3.11                         |
| 1438037_at                 | Herc5         | hect domain and RLD 5                                                         | 67138             | 221     | 683   | 3.09                         |
| 1417045_at                 | Bid           | BH3 interacting domain death agonist                                          | 12122             | 343     | 1052  | 3.07                         |
| 1453228_at                 | Stx11         | syntaxin 11                                                                   | 74732             | 430     | 1312  | 3.06                         |
| 1451567_a_at               | Ifi203        | interferon activated gene 203                                                 | 15950             | 159     | 471   | 2.97                         |
| 1451798_at                 | Il1rn         | interleukin 1 receptor antagonist                                             | 16181             | 225     | 665   | 2.96                         |
| 1418191_at                 | Usp18         | ubiquitin specific peptidase 18                                               | 24110             | 271     | 791   | 2.92                         |
| 1438157_s_at               | Nfkbia        | nuclear factor of kappa light chain gene enhancer in B-cells inhibitor, alpha | 18035             | 3792    | 11076 | 2.92                         |
| 1438658_a_at               | Edg3          | endothelial differentiation, sphingolipid G-protein-coupled receptor, 3       | 13610             | 110     | 321   | 2.92                         |
| 1425394_at                 | BC023105      | cDNA sequence BC023105                                                        | 207269            | 69      | 202   | 2.92                         |
| 1437578_at                 | Clca2         | chloride channel calcium activated 2                                          | 80797             | 90      | 262   | 2.90                         |
| 1427932_s_at               | 1200016E24Rik | RIKEN cDNA 1200016E24 gene                                                    | 319202            | 1187    | 3426  | 2.89                         |
| 1415804_at                 | Cx3cl1        | chemokine (C-X3-C motif) ligand 1                                             | 20312             | 382     | 1099  | 2.88                         |
| 1443990_at                 | Ntrk1         | neurotrophic tyrosine kinase, receptor, type 1                                | 18211             | 79      | 227   | 2.87                         |
| 1417429_at                 | Fmo1          | flavin containing monooxygenase 1                                             | 14261             | 192     | 547   | 2.85                         |
| 1447664_x_at               | AA986860      | expressed sequence AA986860                                                   | 212439            | 109     | 312   | 2.85                         |
| 1434380_at                 | Gbp6          | guanylate binding protein 6                                                   | 229900            | 352     | 994   | 2.83                         |
| 1456572_x_at               | Cct4          | chaperonin subunit 4 (delta)                                                  | 12464             | 192     | 539   | 2.81                         |
| 1417141_at                 | Igtp          | interferon gamma induced GTPase                                               | 16145             | 309     | 868   | 2.81                         |
| 1421075_s_at               | Cyp7b1        | cytochrome P450, family 7, subfamily b, polypeptide 1                         | 13123             | 76      | 212   | 2.77                         |
| 1451544_at                 | Tapbpl        | TAP binding protein-like                                                      | 213233            | 225     | 621   | 2.75                         |
| 1448550_at                 | Lbp           | lipopolysaccharide binding protein                                            | 16803             | 83      | 229   | 2.74                         |
| 1457780_at                 | Stx11         | syntaxin 11                                                                   | 74732             | 279     | 763   | 2.73                         |
| 1420089_at                 | Nfkbia        | nuclear factor of kappa light chain gene enhancer in B-cells inhibitor, alpha | 18035             | 272     | 744   | 2.73                         |
| 1421236_at                 | Ripk2         | receptor (TNFRSF)-interacting serine-threonine kinase 2                       | 192656            | 851     | 2300  | 2.70                         |
| 1423954_at                 | C3            | complement component 3                                                        | 12266             | 490     | 1321  | 2.70                         |
| 1423125_at                 | Dclk1         | doublecortin-like kinase 1                                                    | 13175             | 97      | 262   | 2.69                         |
| 1440721_at                 | 5930433N17Rik | RIKEN cDNA 5930433N17 gene                                                    | 399623            | 90      | 242   | 2.69                         |
| 1424923_at                 | Serpina3g     | serine (or cysteine) peptidase inhibitor, clade A, member 3G                  | 20715             | 596     | 1580  | 2.65                         |



| Affymetrix<br>Probe set ID | Gene symbol   | Gene name                                                                                             | Entrez<br>Gene ID | Control | TNF   | Fold change<br>TNF / Control |
|----------------------------|---------------|-------------------------------------------------------------------------------------------------------|-------------------|---------|-------|------------------------------|
| 1431008_at                 | 0610037M15Rik | RIKEN cDNA 0610037M15 gene                                                                            | 68395             | 127     | 336   | 2.65                         |
| 1439965_at                 |               |                                                                                                       |                   | 319     | 834   | 2.61                         |
| 1435940_at                 | AI836758      | expressed sequence AI836758                                                                           | 99719             | 214     | 554   | 2.59                         |
| 1426063_a_at               | Gem           | GTP binding protein (gene overexpressed in skeletal muscle)                                           | 14579             | 81      | 204   | 2.54                         |
| 1453913_a_at               | Tap2          | transporter 2, ATP-binding cassette, sub-family B (MDR/TAP)                                           | 21355             | 262     | 661   | 2.53                         |
| 1431591_s_at               | LOC677168     | similar to ISG15 ubiquitin-like modifier                                                              | 677168            | 451     | 1130  | 2.51                         |
| 1443536_at                 | Slc7a11       | solute carrier family 7 (cationic amino acid transporter, y+ system), member 11                       | 26570             | 135     | 335   | 2.49                         |
| 1418718_at                 | Cxcl16        | chemokine (C-X-C motif) ligand 16                                                                     | 66102             | 704     | 1753  | 2.49                         |
| 1419714_at                 | Cd274         | CD274 antigen                                                                                         | 60533             | 88      | 219   | 2.48                         |
| 1456291_x_at               | Scx           | scleraxis                                                                                             | 20289             | 147     | 366   | 2.48                         |
| 1417936_at                 | Ccl9          | chemokine (C-C motif) ligand 9                                                                        | 20308             | 704     | 1739  | 2.47                         |
| 1419209_at                 | Cxcl1         | chemokine (C-X-C motif) ligand 1                                                                      | 14825             | 1791    | 4418  | 2.47                         |
| 1454976_at                 | Sod2          | superoxide dismutase 2, mitochondrial                                                                 | 20656             | 415     | 1020  | 2.46                         |
| 1454974_at                 | Ntn1          | netrin 1                                                                                              | 18208             | 162     | 398   | 2.45                         |
| 1419463_at                 | Clca2         | chloride channel calcium activated 2                                                                  | 80797             | 676     | 1651  | 2.44                         |
| 1420183_at                 | Lor           | loricrin                                                                                              | 16939             | 121     | 296   | 2.44                         |
| 1418872_at                 | Abcb1b        | ATP-binding cassette, sub-family B (MDR/TAP), member 1B                                               | 18669             | 256     | 624   | 2.44                         |
| 1416296_at                 | Il2rg         | interleukin 2 receptor, gamma chain                                                                   | 16186             | 228     | 556   | 2.44                         |
| 1455500_at                 | Rnf213        | ring finger protein 213                                                                               | 629974            | 884     | 2152  | 2.43                         |
| 1452348_s_at               | Ifi205        | interferon activated gene 205                                                                         | 226695            | 546     | 1320  | 2.42                         |
| 1450173_at                 | Ripk2         | receptor (TNFRSF)-interacting serine-threonine kinase 2                                               | 192656            | 1846    | 4466  | 2.42                         |
| 1455981_at                 | Rps6          | ribosomal protein S6                                                                                  | 20104             | 1161    | 2790  | 2.40                         |
| 1425519_a_at               | Cd74          | CD74 antigen (invariant polypeptide of major histocompatibility complex, class II antigen-associated) | 16149             | 95      | 229   | 2.40                         |
| 1424948_x_at               | H2-K1         | histocompatibility 2, K1, K region                                                                    | 14972             | 324     | 778   | 2.40                         |
| 1417793_at                 | Iigp2         | interferon inducible GTPase 2                                                                         | 54396             | 327     | 783   | 2.40                         |
| 1448162_at                 | Vcam1         | vascular cell adhesion molecule 1                                                                     | 22329             | 6739    | 15985 | 2.37                         |
| 1417961_a_at               | Trim30        | tripartite motif protein 30                                                                           | 20128             | 468     | 1104  | 2.36                         |
| 1423091_a_at               | Gpm6b         | glycoprotein m6b                                                                                      | 14758             | 378     | 889   | 2.35                         |
| 1457644_s_at               | Cxcl1         | chemokine (C-X-C motif) ligand 1                                                                      | 14825             | 1474    | 3467  | 2.35                         |
| 1453757_at                 | Herc5         | hect domain and RLD 5                                                                                 | 67138             | 88      | 207   | 2.35                         |

| Affymetrix<br>Probe set ID | Gene symbol   | Gene name                                                                      | Entrez<br>Gene ID | Control | TNF  | Fold change<br>TNF / Control |
|----------------------------|---------------|--------------------------------------------------------------------------------|-------------------|---------|------|------------------------------|
| 1418854_at                 | Birc2         | baculoviral IAP repeat-containing 2                                            | 11797             | 1117    | 2624 | 2.35                         |
| 1447873_x_at               | Bid           | BH3 interacting domain death agonist                                           | 12122             | 104     | 243  | 2.35                         |
| 1450297_at                 | Il6           | interleukin 6                                                                  | 16193             | 248     | 582  | 2.34                         |
| 1420591_at                 | Gpr84         | G protein-coupled receptor 84                                                  | 80910             | 104     | 243  | 2.34                         |
| 1435929_at                 | 9630033F20Rik | RIKEN cDNA 9630033F20 gene                                                     | 319801            | 98      | 227  | 2.33                         |
| 1440169_x_at               | Ifnar2        | interferon (alpha and beta) receptor 2                                         | 15976             | 526     | 1220 | 2.32                         |
| 1455275_at                 | E530001K10Rik | RIKEN cDNA E530001K10 gene                                                     | 414123            | 177     | 409  | 2.31                         |
| 1449195_s_at               | Cxcl16        | chemokine (C-X-C motif) ligand 16                                              | 66102             | 446     | 1030 | 2.31                         |
| 1450034_at                 | Stat1         | signal transducer and activator of transcription 1                             | 20846             | 855     | 1965 | 2.30                         |
| 1450534_x_at               | H2-D1         | histocompatibility 2, D region locus 1                                         | 14964             | 206     | 473  | 2.30                         |
| 1428909_at                 | A130040M12Rik | RIKEN cDNA A130040M12 gene                                                     | 319269            | 701     | 1606 | 2.29                         |
| 1457455_at                 | Suhw4         | suppressor of hairy wing homolog 4 (Drosophila)                                | 235469            | 101     | 232  | 2.29                         |
| 1456890_at                 | Ddx58         | DEAD (Asp-Glu-Ala-Asp) box polypeptide 58                                      | 230073            | 254     | 579  | 2.28                         |
| 1427689_a_at               | Tnip1         | TNFAIP3 interacting protein 1                                                  | 57783             | 1436    | 3255 | 2.27                         |
| 1418077_at                 | Trim21        | tripartite motif protein 21                                                    | 20821             | 205     | 464  | 2.26                         |
| 1433125_at                 | 5330422M15Rik | RIKEN cDNA 5330422M15 gene                                                     | 77062             | 91      | 206  | 2.25                         |
| 1448833_at                 | Foxm1         | forkhead box M1                                                                | 14235             | 359     | 808  | 2.25                         |
| 1422781_at                 | Tlr3          | toll-like receptor 3                                                           | 142980            | 243     | 546  | 2.25                         |
| 1415899_at                 | Junb          | Jun-B oncogene                                                                 | 16477             | 432     | 960  | 2.22                         |
| 1423555_a_at               | Ifi44         | interferon-induced protein 44                                                  | 99899             | 356     | 790  | 2.22                         |
| 1449265_at                 | Casp1         | caspase 1                                                                      | 12362             | 238     | 525  | 2.20                         |
| 1418293_at                 | Ifit2         | interferon-induced protein with tetratricopeptide repeats 2                    | 15958             | 285     | 628  | 2.20                         |
| 1434129_s_at               | Lhfp12        | lipoma HMGIC fusion partner-like 2                                             | 218454            | 191     | 419  | 2.20                         |
| 1427771_x_at               | Itgb1         | integrin beta 1 (fibronectin receptor beta)                                    | 16412             | 2980    | 6530 | 2.19                         |
| 1446941_at                 | C78505        | expressed sequence C78505                                                      | 98146             | 107     | 234  | 2.19                         |
| 1424392_at                 | Adhfe1        | alcohol dehydrogenase, iron containing, 1                                      | 76187             | 136     | 298  | 2.18                         |
| 1416897_at                 | Parp9         | poly (ADP-ribose) polymerase family, member 9                                  | 80285             | 530     | 1157 | 2.18                         |
| 1425663_at                 | Il1rn         | interleukin 1 receptor antagonist                                              | 16181             | 138     | 301  | 2.17                         |
| 1435208_at                 | Dtx3l         | deltex 3-like (Drosophila)                                                     | 209200            | 588     | 1276 | 2.17                         |
| 1442186_at                 | A430107N12Rik | RIKEN cDNA A430107N12 gene                                                     | 78432             | 108     | 234  | 2.17                         |
| 1446615_at                 | Shroom4       | shroom family member 4                                                         | 208431            | 102     | 220  | 2.16                         |
| 1428579_at                 | Fmnl2         | formin-like 2                                                                  | 71409             | 528     | 1138 | 2.15                         |
| 1418666_at                 | Ptx3          | pentraxin related gene                                                         | 19288             | 1648    | 3533 | 2.14                         |
| 1429128_x_at               | Nfkb2         | nuclear factor of kappa light polypeptide gene enhancer in B-cells 2, p49/p100 | 18034             | 170     | 363  | 2.14                         |
| 1416273_at                 | Tnfaip2       | tumor necrosis factor, alpha-induced protein 2                                 | 21928             | 287     | 614  | 2.14                         |

| Affymetrix<br>Probe set ID | Gene symbol   | Gene name                                                      | Entrez<br>Gene ID | Control | TNF  | Fold change<br>TNF / Control |
|----------------------------|---------------|----------------------------------------------------------------|-------------------|---------|------|------------------------------|
| 1425749_at                 | Stxbp6        | syntaxin binding protein 6 (amisyn)                            | 217517            | 396     | 844  | 2.13                         |
| 1418881_at                 | Efcfbp2       | EF hand calcium binding protein 2                              | 117148            | 186     | 395  | 2.12                         |
| 1447377_at                 | Gm428         | gene model 428, (NCBI)                                         | 242502            | 244     | 516  | 2.12                         |
| 1448795_a_at               | Tbrg4         | transforming growth factor beta regulated gene 4               | 21379             | 314     | 666  | 2.12                         |
| 1456582_x_at               | LOC637796     | hypothetical protein LOC637796                                 | 637796            | 384     | 810  | 2.11                         |
| 1429692_s_at               | Gch1          | GTP cyclohydrolase 1                                           | 14528             | 574     | 1208 | 2.10                         |
| 1451860_a_at               | Trim30        | tripartite motif protein 30                                    | 20128             | 283     | 594  | 2.09                         |
| 1417244_a_at               | Irf7          | interferon regulatory factor 7                                 | 54123             | 203     | 426  | 2.09                         |
| 1418999_at                 | 2310033P09Rik | RIKEN cDNA 2310033P09 gene                                     | 67862             | 210     | 439  | 2.09                         |
| 1452840_at                 | 1500009L16Rik | RIKEN cDNA 1500009L16 gene                                     | 69784             | 315     | 657  | 2.08                         |
| 1452178_at                 | Plec1         | plectin 1                                                      | 18810             | 244     | 506  | 2.07                         |
| 1425656_a_at               | Baiap2        | brain-specific angiogenesis inhibitor 1-associated protein 2   | 108100            | 144     | 298  | 2.07                         |
| 1438716_at                 | AI451617      | expressed sequence AI451617                                    | 209387            | 115     | 237  | 2.06                         |
| 1416295_a_at               | Il2rg         | interleukin 2 receptor, gamma chain                            | 16186             | 533     | 1098 | 2.06                         |
| 1450454_at                 | Tor3a         | torsin family 3, member A                                      | 30935             | 239     | 490  | 2.05                         |
| 1439269_x_at               | Mcm7          | minichromosome maintenance deficient 7 (S. cerevisiae)         | 17220             | 563     | 1151 | 2.04                         |
| 1433245_at                 | 6720475M21Rik | RIKEN cDNA 6720475M21 gene                                     | 77896             | 109     | 222  | 2.04                         |
| 1447766_x_at               | Limd2         | LIM domain containing 2                                        | 67803             | 166     | 340  | 2.04                         |
| 1426906_at                 | Ifi205        | interferon activated gene 205                                  | 226695            | 750     | 1528 | 2.04                         |
| 1422742_at                 | Hivep1        | human immunodeficiency virus type I enhancer binding protein 1 | 110521            | 611     | 1242 | 2.03                         |
| 1437091_at                 | Accn4         | amiloride-sensitive cation channel 4, pituitary                | 241118            | 116     | 237  | 2.03                         |
| 1420276_x_at               |               |                                                                |                   | 282     | 574  | 2.03                         |
| 1458667_at                 | 4930519N13Rik | RIKEN cDNA 4930519N13 gene                                     | 78177             | 1465    | 2970 | 2.03                         |
| 1446190_at                 | Dclk1         | doublecortin-like kinase 1                                     | 13175             | 193     | 392  | 2.03                         |
| 1450403_at                 | Stat2         | signal transducer and activator of transcription 2             | 20847             | 283     | 572  | 2.02                         |
| 1419217_at                 | Sergef        | secretion regulating guanine nucleotide exchange factor        | 27414             | 101     | 204  | 2.02                         |
| 1416016_at                 | Tap1          | transporter 1, ATP-binding cassette, sub-family B (MDR/TAP)    | 21354             | 318     | 641  | 2.02                         |
| 1421129_a_at               | Atp2a3        | ATPase, Ca <sup>++</sup> transporting, ubiquitous              | 53313             | 129     | 260  | 2.02                         |
| 1421594_a_at               | Syt12         | synaptotagmin-like 2                                           | 83671             | 126     | 254  | 2.02                         |
| 1455581_x_at               | Samd9l        | sterile alpha motif domain containing 9-like                   | 209086            | 718     | 1449 | 2.02                         |
| 1443698_at                 | Fbxo39        | F-box protein 39                                               | 327959            | 667     | 1344 | 2.01                         |
| 1447301_at                 | Akap5         | A kinase (PRKA) anchor protein 5                               | 238276            | 154     | 311  | 2.01                         |

| Affymetrix<br>Probe set ID | Gene symbol   | Gene name                                                                                                              | Entrez<br>Gene ID | Control | TNF  | Fold change<br>TNF / Control |
|----------------------------|---------------|------------------------------------------------------------------------------------------------------------------------|-------------------|---------|------|------------------------------|
| 1425336_x_at               | H2-K1         | histocompatibility 2, K1, K region                                                                                     | 14972             | 2892    | 5795 | 2.00                         |
| 1455678_at                 | Sema4b        | sema domain, immunoglobulin domain (Ig),<br>transmembrane domain (TM) and short cytoplasmic<br>domain, (semaphorin) 4B | 20352             | 127     | 255  | 2.00                         |
| 1448700_at                 | G0s2          | G0/G1 switch gene 2                                                                                                    | 14373             | 440     | 219  | -2.01                        |
| 1435776_at                 | 2310009B15Rik | RIKEN cDNA 2310009B15 gene                                                                                             | 69549             | 328     | 163  | -2.01                        |
| 1450243_a_at               | Rcan2         | regulator of calcineurin 2                                                                                             | 53901             | 1135    | 565  | -2.01                        |
| 1449751_at                 | Slc6a6        | solute carrier family 6 (neurotransmitter transporter,<br>taurine), member 6                                           | 21366             | 280     | 139  | -2.02                        |
| 1429516_at                 | Ubr2          | ubiquitin protein ligase E3 component n-recognin 2                                                                     | 224826            | 222     | 110  | -2.02                        |
| 1426237_at                 | Sp2           | Sp2 transcription factor                                                                                               | 78912             | 591     | 292  | -2.02                        |
| 1438232_at                 | Foxp2         | forkhead box P2                                                                                                        | 114142            | 822     | 406  | -2.03                        |
| 1417019_a_at               | Cdc6          | cell division cycle 6 homolog (S. cerevisiae)                                                                          | 23834             | 211     | 104  | -2.03                        |
| 1431028_a_at               | Pank1         | pantothenate kinase 1                                                                                                  | 75735             | 210     | 103  | -2.03                        |
| 1428612_at                 | Atg7          | autophagy-related 7 (yeast)                                                                                            | 74244             | 675     | 331  | -2.04                        |
| 1436373_at                 | Map3k10       | mitogen activated protein kinase kinase kinase 10                                                                      | 269881            | 292     | 143  | -2.04                        |
| 1457528_at                 | Slc4a7        | solute carrier family 4, sodium bicarbonate<br>cotransporter, member 7                                                 | 218756            | 329     | 159  | -2.06                        |
| 1443354_at                 | Trim59        | tripartite motif-containing 59                                                                                         | 66949             | 285     | 138  | -2.06                        |
| 1460373_a_at               | Setd4         | SET domain containing 4                                                                                                | 224440            | 277     | 134  | -2.07                        |
| 1419593_at                 | Greb1         | gene regulated by estrogen in breast cancer protein                                                                    | 268527            | 315     | 152  | -2.07                        |
| 1445322_x_at               | E430025E21Rik | RIKEN cDNA E430025E21 gene                                                                                             | 223593            | 453     | 219  | -2.07                        |
| 1424022_at                 | Osgin1        | oxidative stress induced growth inhibitor 1                                                                            | 71839             | 310     | 148  | -2.09                        |
| 1456569_x_at               | Gsn           | gelsolin                                                                                                               | 227753            | 322     | 154  | -2.09                        |
| 1434639_at                 | Klhl29        | kelch-like 29 (Drosophila)                                                                                             | 208439            | 537     | 255  | -2.11                        |
| 1431056_a_at               | Lpl           | lipoprotein lipase                                                                                                     | 16956             | 227     | 107  | -2.12                        |
| 1425698_a_at               | Crebzf        | CREB/ATF bZIP transcription factor                                                                                     | 233490            | 295     | 137  | -2.15                        |
| 1450179_at                 | Sost          | sclerostin                                                                                                             | 74499             | 790     | 368  | -2.15                        |
| 1426752_at                 | Phf17         | PHD finger protein 17                                                                                                  | 269424            | 714     | 331  | -2.16                        |
| 1452292_at                 | Ap2b1         | adaptor-related protein complex 2, beta 1 subunit                                                                      | 71770             | 1221    | 566  | -2.16                        |
| 1443983_at                 | Sorbs1        | sorbin and SH3 domain containing 1                                                                                     | 20411             | 201     | 93   | -2.16                        |
| 1418294_at                 | Epb4.114b     | erythrocyte protein band 4.1-like 4b                                                                                   | 54357             | 603     | 278  | -2.17                        |
| 1452508_x_at               | Ptms          | parathyrosin                                                                                                           | 69202             | 273     | 125  | -2.19                        |
| 1429463_at                 | Prkaa2        | protein kinase, AMP-activated, alpha 2 catalytic<br>subunit                                                            | 108079            | 374     | 167  | -2.24                        |
| 1440227_at                 | BF642829      | expressed sequence BF642829                                                                                            | 503859            | 1551    | 686  | -2.26                        |

| Affymetrix<br>Probe set ID | Gene symbol | Gene name                                                                 | Entrez<br>Gene ID | Control | TNF | Fold change<br>TNF / Control |
|----------------------------|-------------|---------------------------------------------------------------------------|-------------------|---------|-----|------------------------------|
| 1450337_a_at               | Nek8        | NIMA (never in mitosis gene a)-related expressed kinase 8                 | 140859            | 236     | 100 | -2.35                        |
| 1416588_at                 | Ptpn        | protein tyrosine phosphatase, receptor type, N                            | 19275             | 350     | 147 | -2.37                        |
| 1440311_at                 | Sorbs1      | sorbin and SH3 domain containing 1                                        | 20411             | 287     | 121 | -2.38                        |
| 1449363_at                 | Atf3        | activating transcription factor 3                                         | 11910             | 317     | 132 | -2.40                        |
| 1453821_at                 | N6amt1      | N-6 adenine-specific DNA methyltransferase 1 (putative)                   | 67768             | 240     | 100 | -2.40                        |
| 1459865_x_at               | Ces7        | carboxylesterase 7                                                        | 67935             | 1818    | 751 | -2.42                        |
| 1449350_at                 | Osr1        | odd-skipped related 1 (Drosophila)                                        | 23967             | 1553    | 637 | -2.44                        |
| 1437669_x_at               | Ccr1l       | chemokine (C-C motif) receptor-like 1                                     | 252837            | 584     | 239 | -2.44                        |
| 1455582_at                 |             |                                                                           |                   | 235     | 95  | -2.46                        |
| 1420931_at                 | Mapk8       | mitogen activated protein kinase 8                                        | 26419             | 247     | 100 | -2.47                        |
| 1420876_a_at               | Sept6       | septin 6                                                                  | 56526             | 218     | 86  | -2.53                        |
| 1437149_at                 | Slc6a6      | solute carrier family 6 (neurotransmitter transporter, taurine), member 6 | 21366             | 2553    | 991 | -2.58                        |
| 1457257_x_at               |             |                                                                           |                   | 240     | 91  | -2.62                        |
| 1447363_s_at               | Bub1b       | budding uninhibited by benzimidazoles 1 homolog, beta (S. cerevisiae)     | 12236             | 265     | 100 | -2.66                        |
| 1435672_at                 | 3830612M24  | hypothetical protein 3830612M24                                           | 330635            | 282     | 104 | -2.71                        |
| 1426139_a_at               | Ccr1l       | chemokine (C-C motif) receptor-like 1                                     | 252837            | 262     | 95  | -2.75                        |
| 1444240_at                 | Shank1      | SH3/ankyrin domain gene 1                                                 | 243961            | 425     | 144 | -2.96                        |
| 1420715_a_at               | Pparg       | peroxisome proliferator activated receptor gamma                          | 19016             | 218     | 67  | -3.27                        |

**Table SI.c. TNF-regulated probe sets at 24h.**

| Affymetrix<br>Probe set ID | Gene symbol   | Gene name                                                                                                    | Entrez<br>Gene ID | Control | TNF  | Fold change<br>TNF / Control |
|----------------------------|---------------|--------------------------------------------------------------------------------------------------------------|-------------------|---------|------|------------------------------|
| 1448881_at                 | Hp            | haptoglobin                                                                                                  | 15439             | 52      | 1471 | 28.40                        |
| 1421228_at                 | Ccl7          | chemokine (C-C motif) ligand 7                                                                               | 20306             | 44      | 514  | 11.66                        |
| 1427746_x_at               | H2-K1         | histocompatibility 2, K1, K region                                                                           | 14972             | 576     | 4511 | 7.83                         |
| 1418126_at                 | Ccl5          | chemokine (C-C motif) ligand 5                                                                               | 20304             | 83      | 649  | 7.81                         |
| 1420380_at                 | Ccl2          | chemokine (C-C motif) ligand 2                                                                               | 20296             | 370     | 2490 | 6.73                         |
| 1423954_at                 | C3            | complement component 3                                                                                       | 12266             | 419     | 2729 | 6.51                         |
| 1437578_at                 | Clca2         | chloride channel calcium activated 2                                                                         | 80797             | 64      | 380  | 5.90                         |
| 1436003_at                 | Vcam1         | vascular cell adhesion molecule 1                                                                            | 22329             | 507     | 2850 | 5.62                         |
| 1427747_a_at               | Lcn2          | lipocalin 2                                                                                                  | 16819             | 397     | 1880 | 4.74                         |
| 1449075_at                 | Exd12         | exonuclease 3"-5" domain-like 2                                                                              | 97827             | 54      | 241  | 4.47                         |
| 1419463_at                 | Clca2         | chloride channel calcium activated 2                                                                         | 80797             | 767     | 3374 | 4.40                         |
| 1449711_at                 | Atp6v1e1      | VATPase, H+ transporting, lysosomal V1 subunit E1                                                            | 11973             | 137     | 573  | 4.18                         |
| 1453196_a_at               | Oas12         | 2'-5' oligoadenylate synthetase-like 2                                                                       | 23962             | 63      | 228  | 3.62                         |
| 1458299_s_at               | Nfkbie        | nuclear factor of kappa light polypeptide gene<br>enhancer in B-cells inhibitor, epsilon                     | 18037             | 129     | 457  | 3.54                         |
| 1425519_a_at               | Cd74          | CD74 antigen (invariant polypeptide of major<br>histocompatibility complex, class II antigen-<br>associated) | 16149             | 103     | 309  | 3.00                         |
| 1448550_at                 | Lbp           | lipopolysaccharide binding protein                                                                           | 16803             | 112     | 330  | 2.93                         |
| 1422962_a_at               | Psmb8         | proteasome (prosome, macropain) subunit, beta type<br>8 (large multifunctional peptidase 7)                  | 16913             | 112     | 313  | 2.79                         |
| 1451314_a_at               | Vcam1         | vascular cell adhesion molecule 1                                                                            | 22329             | 2379    | 6633 | 2.79                         |
| 1435690_at                 | 2310008H09Rik | RIKEN cDNA 2310008H09 gene                                                                                   | 66356             | 96      | 264  | 2.76                         |
| 1424948_x_at               | H2-K1         | histocompatibility 2, K1, K region                                                                           | 14972             | 433     | 1180 | 2.73                         |
| 1416296_at                 | Il2rg         | interleukin 2 receptor, gamma chain                                                                          | 16186             | 259     | 705  | 2.72                         |
| 1423887_a_at               | Telo2         | TEL2, telomere maintenance 2, homolog (S.<br>cerevisiae)                                                     | 71718             | 154     | 413  | 2.67                         |
| 1435940_at                 | AI836758      | expressed sequence AI836758                                                                                  | 99719             | 178     | 472  | 2.64                         |
| 1460414_at                 | Obsl1         | obscurin-like 1                                                                                              | 98733             | 77      | 202  | 2.62                         |
| 1453238_s_at               | 1200016E24Rik | RIKEN cDNA 1200016E24 gene                                                                                   | 319202            | 615     | 1604 | 2.61                         |
| 1460242_at                 | Cd55          | CD55 antigen                                                                                                 | 13136             | 327     | 834  | 2.55                         |
| 1450826_a_at               | Saa3          | serum amyloid A 3                                                                                            | 20210             | 125     | 311  | 2.49                         |
| 1448306_at                 | Nfkbia        | nuclear factor of kappa light chain gene enhancer in<br>B-cells inhibitor, alpha                             | 18035             | 1392    | 3462 | 2.49                         |
| 1439965_at                 |               |                                                                                                              |                   | 207     | 510  | 2.46                         |
| 1435666_at                 | Mast3         | microtubule associated serine/threonine kinase 3                                                             | 546071            | 86      | 210  | 2.45                         |

| Affymetrix<br>Probe set ID | Gene symbol   | Gene name                                                                 | Entrez<br>Gene ID | Control | TNF  | Fold change<br>TNF / Control |
|----------------------------|---------------|---------------------------------------------------------------------------|-------------------|---------|------|------------------------------|
| 1418762_at                 | Cd55          | CD55 antigen                                                              | 13136             | 263     | 644  | 2.44                         |
| 1421392_a_at               | Birc3         | baculoviral IAP repeat-containing 3                                       | 11796             | 274     | 666  | 2.43                         |
| 1449014_at                 | Lactb         | lactamase, beta                                                           | 80907             | 139     | 330  | 2.37                         |
| 1449591_at                 | Casp4         | caspase 4, apoptosis-related cysteine peptidase                           | 12363             | 432     | 1023 | 2.37                         |
| 1459293_at                 | Gprin3        | GPRIN family member 3                                                     | 243385            | 93      | 217  | 2.34                         |
| 1415989_at                 | Vcam1         | vascular cell adhesion molecule 1                                         | 22329             | 2985    | 6957 | 2.33                         |
| 1424270_at                 | Dclk1         | doublecortin-like kinase 1                                                | 13175             | 388     | 886  | 2.28                         |
| 1436002_at                 | C230013L11Rik | RIKEN cDNA C230013L11 gene                                                | 319712            | 103     | 234  | 2.28                         |
| 1418240_at                 | Gbp2          | guanylate nucleotide binding protein 2                                    | 14469             | 509     | 1150 | 2.26                         |
| 1425784_a_at               | Olfm1         | olfactomedin 1                                                            | 56177             | 101     | 228  | 2.25                         |
| 1435565_at                 | 1500011H22Rik | RIKEN cDNA 1500011H22 gene                                                | 68948             | 166     | 374  | 2.25                         |
| 1448632_at                 | Psmb10        | proteasome (prosome, macropain) subunit, beta type 10                     | 19171             | 333     | 748  | 2.25                         |
| 1425336_x_at               | H2-K1         | histocompatibility 2, K1, K region                                        | 14972             | 3096    | 6893 | 2.23                         |
| 1421989_s_at               | Papss2        | 3'-phosphoadenosine 5'-phosphosulfate synthase 2                          | 23972             | 577     | 1282 | 2.22                         |
| 1438406_at                 | Scarf2        | scavenger receptor class F, member 2                                      | 224024            | 135     | 296  | 2.20                         |
| 1443906_at                 | Cd55          | CD55 antigen                                                              | 13136             | 219     | 475  | 2.17                         |
| 1434781_at                 | Dnajc16       | DnaJ (Hsp40) homolog, subfamily C, member 16                              | 214063            | 183     | 391  | 2.13                         |
| 1424921_at                 | Brd4          | bromodomain containing 4                                                  | 57261             | 898     | 1914 | 2.13                         |
| 1425154_a_at               | Csfl          | colony stimulating factor 1 (macrophage)                                  | 12977             | 869     | 1848 | 2.13                         |
| 1436807_x_at               | Trim62        | tripartite motif-containing 62                                            | 67525             | 183     | 386  | 2.11                         |
| 1460633_at                 | Prpf19        | PRP19/PSO4 pre-mRNA processing factor 19 homolog ( <i>S. cerevisiae</i> ) | 28000             | 252     | 531  | 2.11                         |
| 1432269_a_at               | Sh3kbp1       | SH3-domain kinase binding protein 1                                       | 58194             | 184     | 387  | 2.10                         |
| 1450378_at                 | Tapbp         | TAP binding protein                                                       | 21356             | 922     | 1934 | 2.10                         |
| 1449423_at                 | Mast1         | microtubule associated serine/threonine kinase 1                          | 56527             | 124     | 258  | 2.08                         |
| 1435137_s_at               | 1200016E24Rik | RIKEN cDNA 1200016E24 gene                                                | 319202            | 533     | 1105 | 2.07                         |
| 1450534_x_at               | H2-D1         | histocompatibility 2, D region locus 1                                    | 14964             | 261     | 540  | 2.07                         |
| 1424590_at                 | Ddx19b        | DEAD (Asp-Glu-Ala-Asp) box polypeptide 19b                                | 234733            | 149     | 308  | 2.07                         |
| 1449195_s_at               | Cxcl16        | chemokine (C-X-C motif) ligand 16                                         | 66102             | 436     | 900  | 2.07                         |
| 1421812_at                 | Tapbp         | TAP binding protein                                                       | 21356             | 2991    | 6170 | 2.06                         |
| 1432304_a_at               | 9030624J02Rik | RIKEN cDNA 9030624J02 gene                                                | 71517             | 160     | 328  | 2.05                         |
| 1419100_at                 | Serpina3n     | serine (or cysteine) peptidase inhibitor, clade A, member 3N              | 20716             | 656     | 1344 | 2.05                         |
| 1454182_at                 | 5430417C01Rik | RIKEN cDNA 5430417C01 gene                                                | 78548             | 110     | 224  | 2.05                         |
| 1435906_x_at               | Gbp2          | guanylate nucleotide binding protein 2                                    | 14469             | 583     | 1192 | 2.05                         |
| 1424271_at                 | Dclk1         | doublecortin-like kinase 1                                                | 13175             | 1494    | 3053 | 2.04                         |

| Affymetrix<br>Probe set ID | Gene symbol   | Gene name                                                                        | Entrez<br>Gene ID | Control | TNF  | Fold change<br>TNF / Control |
|----------------------------|---------------|----------------------------------------------------------------------------------|-------------------|---------|------|------------------------------|
| 1421129_a_at               | Atp2a3        | ATPase, Ca <sup>++</sup> transporting, ubiquitous                                | 53313             | 207     | 422  | 2.04                         |
| 1451784_x_at               | H2-D1         | histocompatibility 2, D region locus 1                                           | 14964             | 1937    | 3949 | 2.04                         |
| 1454857_at                 | Rnf122        | ring finger protein 122                                                          | 68867             | 116     | 236  | 2.04                         |
| 1449029_at                 | Mknk2         | MAP kinase-interacting serine/threonine kinase 2                                 | 17347             | 208     | 420  | 2.02                         |
| 1435193_at                 | A230050P20Rik | RIKEN cDNA A230050P20 gene                                                       | 319278            | 112     | 227  | 2.02                         |
| 1438855_x_at               | Tnfaip2       | tumor necrosis factor, alpha-induced protein 2                                   | 21928             | 439     | 887  | 2.02                         |
| 1449731_s_at               | Nfkbia        | nuclear factor of kappa light chain gene enhancer in<br>B-cells inhibitor, alpha | 18035             | 2215    | 4474 | 2.02                         |
| 1440976_at                 | 1110035M17Rik | RIKEN cDNA 1110035M17 gene                                                       | 432396            | 101     | 203  | 2.02                         |
| 1454974_at                 | Ntn1          | netrin 1                                                                         | 18208             | 213     | 429  | 2.01                         |
| 1417853_at                 | Clca1         | chloride channel calcium activated 1                                             | 12722             | 214     | 429  | 2.00                         |
| 1417040_a_at               | Bok           | Bcl-2-related ovarian killer protein                                             | 51800             | 505     | 251  | -2.01                        |
| 1450429_at                 | Capn6         | calpain 6                                                                        | 12338             | 406     | 201  | -2.02                        |
| 1424007_at                 | Gdf10         | growth differentiation factor 10                                                 | 14560             | 2082    | 1027 | -2.03                        |
| 1437633_at                 | Ankrd11       | ankyrin repeat domain 11                                                         | 77087             | 260     | 128  | -2.03                        |
| 1435820_x_at               | Ddr1          | discoidin domain receptor family, member 1                                       | 12305             | 2889    | 1422 | -2.03                        |
| 1420931_at                 | Mapk8         | mitogen activated protein kinase 8                                               | 26419             | 221     | 109  | -2.03                        |
| 1436279_at                 |               |                                                                                  |                   | 859     | 417  | -2.06                        |
| 1427735_a_at               | Acta1         | actin, alpha 1, skeletal muscle                                                  | 11459             | 709     | 342  | -2.07                        |
| 1454001_at                 |               |                                                                                  |                   | 294     | 141  | -2.09                        |
| 1456793_at                 | Cyt11         | cytokine like 1                                                                  | 231162            | 617     | 295  | -2.09                        |
| 1427038_at                 | Penk1         | preproenkephalin 1                                                               | 18619             | 6522    | 3011 | -2.17                        |
| 1435796_at                 | 4933413A10Rik | RIKEN cDNA 4933413A10 gene                                                       | 243220            | 518     | 239  | -2.17                        |
| 1454366_at                 | 4833419A21Rik | RIKEN cDNA 4833419A21 gene                                                       | 73755             | 221     | 101  | -2.18                        |
| 1420387_at                 | Mpv17         | Mpv17 transgene, kidney disease mutant                                           | 17527             | 2223    | 1017 | -2.19                        |
| 1418839_at                 | Glmn          | glomulin, FKBP associated protein                                                | 170823            | 278     | 127  | -2.19                        |
| 1447982_at                 | 1110008P14Rik | RIKEN cDNA 1110008P14 gene                                                       | 73737             | 1177    | 537  | -2.19                        |
| 1436151_x_at               | BC031781      | cDNA sequence BC031781                                                           | 208768            | 851     | 388  | -2.19                        |
| 1449827_at                 | Acan          | aggrecan                                                                         | 11595             | 2346    | 1061 | -2.21                        |
| 1426963_at                 | Pacs2         | phosphofurin acidic cluster sorting protein 2                                    | 217893            | 591     | 253  | -2.34                        |
| 1420284_at                 | Bat4          | HLA-B associated transcript 4                                                    | 81845             | 1302    | 546  | -2.39                        |
| 1419974_at                 | Scp2          | sterol carrier protein 2, liver                                                  | 20280             | 420     | 173  | -2.43                        |
| 1435684_at                 | Abcc5         | ATP-binding cassette, sub-family C (CFTR/MRP),<br>member 5                       | 27416             | 1717    | 696  | -2.47                        |
| 1427030_at                 | Ccdc52        | coiled-coil domain containing 52                                                 | 212514            | 202     | 80   | -2.51                        |
| 1441921_x_at               | Esrrb         | estrogen related receptor, beta                                                  | 26380             | 206     | 82   | -2.52                        |



| <b>Affymetrix<br/>Probe set ID</b> | <b>Gene symbol</b> | <b>Gene name</b>                                                       | <b>Entrez<br/>Gene ID</b> | <b>Control</b> | <b>TNF</b> | <b>Fold change<br/>TNF / Control</b> |
|------------------------------------|--------------------|------------------------------------------------------------------------|---------------------------|----------------|------------|--------------------------------------|
| 1441891_x_at                       | Elov17             | ELOVL family member 7, elongation of long chain<br>fatty acids (yeast) | 74559                     | 290            | 114        | -2.54                                |
| 1448700_at                         | G0s2               | G0/G1 switch gene 2                                                    | 14373                     | 566            | 218        | -2.59                                |
| 1456291_x_at                       | Scx                | scleraxis                                                              | 20289                     | 307            | 117        | -2.62                                |
| 1445723_at                         | Plcl1              | phospholipase C-like 1                                                 | 227120                    | 223            | 77         | -2.88                                |
| 1432350_at                         | Sync               | syncoilin                                                              | 68828                     | 664            | 230        | -2.88                                |
| 1416725_at                         | Tcf4               | transcription factor 4                                                 | 21413                     | 204            | 71         | -2.89                                |
| 1426984_at                         | 2310067B10Rik      | RIKEN cDNA 2310067B10 gene                                             | 71947                     | 353            | 114        | -3.11                                |
| 1438623_x_at                       | Rbx1               | ring-box 1                                                             | 56438                     | 521            | 162        | -3.21                                |
| 1452292_at                         | Ap2b1              | adaptor-related protein complex 2, beta 1 subunit                      | 71770                     | 1822           | 568        | -3.21                                |
| 1438403_s_at                       | Ramp2              | receptor (calcitonin) activity modifying protein 2                     | 54409                     | 580            | 173        | -3.35                                |

**Table SI.d.  $\alpha$ -LT $\beta$ R-regulated probe sets at 2h.**

| Affymetrix<br>Probe set ID | Gene symbol   | Gene name                                                             | Entrez<br>Gene ID | Control | $\alpha$ -LT $\beta$ R | Fold change<br>$\alpha$ -LT $\beta$ R /<br>Control |
|----------------------------|---------------|-----------------------------------------------------------------------|-------------------|---------|------------------------|----------------------------------------------------|
| 1416218_x_at               | Rpl37a        | ribosomal protein L37a                                                | 19981             | 312     | 937                    | 3.00                                               |
| 1420380_at                 | Ccl2          | chemokine (C-C motif) ligand 2                                        | 20296             | 573     | 1517                   | 2.65                                               |
| 1453806_at                 | Ndufb2        | NADH dehydrogenase (ubiquinone) 1 beta<br>subcomplex, 2               | 68198             | 106     | 263                    | 2.48                                               |
| 1420183_at                 | Lor           | loricrin                                                              | 16939             | 98      | 235                    | 2.40                                               |
| 1417352_s_at               | Snrpa1        | small nuclear ribonucleoprotein polypeptide A'                        | 68981             | 560     | 1333                   | 2.38                                               |
| 1456572_x_at               | Cct4          | chaperonin subunit 4 (delta)                                          | 12464             | 129     | 306                    | 2.37                                               |
| 1449768_at                 |               |                                                                       |                   | 102     | 235                    | 2.30                                               |
| 1434433_x_at               | Wdr61         | WD repeat domain 61                                                   | 66317             | 93      | 212                    | 2.28                                               |
| 1441285_at                 | 4833426J09Rik | RIKEN cDNA 4833426J09 gene                                            | 382051            | 104     | 231                    | 2.22                                               |
| 1438549_a_at               | Srr           | serine racemase                                                       | 27364             | 233     | 499                    | 2.14                                               |
| 1425881_at                 | Psg28         | pregnancy-specific glycoprotein 28                                    | 114871            | 115     | 237                    | 2.06                                               |
| 1460024_at                 | Tnrc6b        | trinucleotide repeat containing 6b                                    | 213988            | 103     | 209                    | 2.02                                               |
| 1445264_at                 | Catsper2      | cation channel, sperm associated 2                                    | 212670            | 209     | 104                    | -2.02                                              |
| 1452809_at                 | 9030607L17Rik | RIKEN cDNA 9030607L17 gene                                            | 71564             | 264     | 128                    | -2.06                                              |
| 1447728_x_at               | Hspa9         | heat shock protein 9                                                  | 15526             | 1092    | 527                    | -2.07                                              |
| 1419092_a_at               | Slk           | STE20-like kinase (yeast)                                             | 20874             | 211     | 101                    | -2.08                                              |
| 1448598_at                 | Mmp17         | matrix metalloproteinase 17                                           | 23948             | 252     | 109                    | -2.31                                              |
| 1429516_at                 | Ubr2          | ubiquitin protein ligase E3 component n-recognin 2                    | 224826            | 208     | 85                     | -2.45                                              |
| 1417154_at                 | Slc25a14      | solute carrier family 25 (mitochondrial carrier,<br>brain), member 14 | 20523             | 218     | 88                     | -2.47                                              |
| 1455578_x_at               | Rpl41         | ribosomal protein L41                                                 | 67945             | 17174   | 4479                   | -3.83                                              |
| 1433792_at                 | Nrip2         | nuclear receptor interacting protein 2                                | 60345             | 267     | 68                     | -3.92                                              |
| 1449363_at                 | Atf3          | activating transcription factor 3                                     | 11910             | 393     | 94                     | -4.19                                              |
| 1454791_a_at               | Rbbp4         | retinoblastoma binding protein 4                                      | 19646             | 1771    | 388                    | -4.56                                              |
| 1456569_x_at               | Gsn           | gelsolin                                                              | 227753            | 321     | 47                     | -6.88                                              |

**Table SI.e.  $\alpha$ -LT $\beta$ R-regulated probe sets at 6h.**

| Affymetrix<br>Probe set ID | Gene symbol   | Gene name                                                                                | Entrez<br>Gene ID | Control | $\alpha$ -LT $\beta$ R | Fold change<br>$\alpha$ -LT $\beta$ R /<br>Control |
|----------------------------|---------------|------------------------------------------------------------------------------------------|-------------------|---------|------------------------|----------------------------------------------------|
| 1432104_a_at               | Allc          | allantoicase                                                                             | 94041             | 32      | 202                    | 6.35                                               |
| 1421228_at                 | Ccl7          | chemokine (C-C motif) ligand 7                                                           | 20306             | 67      | 314                    | 4.68                                               |
| 1420380_at                 | Ccl2          | chemokine (C-C motif) ligand 2                                                           | 20296             | 692     | 3051                   | 4.41                                               |
| 1450829_at                 | Tnfaip3       | tumor necrosis factor, alpha-induced protein 3                                           | 21929             | 123     | 424                    | 3.46                                               |
| 1421392_a_at               | Birc3         | baculoviral IAP repeat-containing 3                                                      | 11796             | 281     | 955                    | 3.40                                               |
| 1458299_s_at               | Nfkbie        | nuclear factor of kappa light polypeptide gene<br>enhancer in B-cells inhibitor, epsilon | 18037             | 190     | 551                    | 2.90                                               |
| 1446190_at                 | Dclk1         | doublecortin-like kinase 1                                                               | 13175             | 193     | 558                    | 2.89                                               |
| 1424923_at                 | Serpina3g     | serine (or cysteine) peptidase inhibitor, clade A,<br>member 3G                          | 20715             | 596     | 1584                   | 2.66                                               |
| 1425902_a_at               | Nfkb2         | nuclear factor of kappa light polypeptide gene<br>enhancer in B-cells 2, p49/p100        | 18034             | 281     | 703                    | 2.50                                               |
| 1440721_at                 | 5930433N17Rik | RIKEN cDNA 5930433N17 gene                                                               | 399623            | 90      | 222                    | 2.47                                               |
| 1433699_at                 | Tnfaip3       | tumor necrosis factor, alpha-induced protein 3                                           | 21929             | 723     | 1761                   | 2.44                                               |
| 1454592_at                 | 9430012M22Rik | RIKEN cDNA 9430012M22 gene                                                               | 77244             | 141     | 329                    | 2.33                                               |
| 1428702_at                 | Ddx28         | DEAD (Asp-Glu-Ala-Asp) box polypeptide 28                                                | 71986             | 193     | 446                    | 2.31                                               |
| 1457455_at                 | Suhw4         | suppressor of hairy wing homolog 4 (Drosophila)                                          | 235469            | 101     | 234                    | 2.31                                               |
| 1435929_at                 | 9630033F20Rik | RIKEN cDNA 9630033F20 gene                                                               | 319801            | 98      | 222                    | 2.28                                               |
| 1449731_s_at               | Nfkbia        | nuclear factor of kappa light chain gene enhancer in<br>B-cells inhibitor, alpha         | 18035             | 2379    | 5391                   | 2.27                                               |
| 1457161_at                 | 9530029O12Rik | RIKEN cDNA 9530029O12 gene                                                               | 399629            | 166     | 374                    | 2.25                                               |
| 1417856_at                 | Relb          | avian reticuloendotheliosis viral (v-rel) oncogene<br>related B                          | 19698             | 243     | 539                    | 2.22                                               |
| 1448306_at                 | Nfkbia        | nuclear factor of kappa light chain gene enhancer in<br>B-cells inhibitor, alpha         | 18035             | 1543    | 3357                   | 2.18                                               |
| 1415899_at                 | Junb          | Jun-B oncogene                                                                           | 16477             | 432     | 924                    | 2.14                                               |
| 1447803_x_at               | Capg          | capping protein (actin filament), gelsolin-like                                          | 12332             | 110     | 232                    | 2.10                                               |
| 1434122_at                 | Fbxo27        | F-box protein 27                                                                         | 233040            | 110     | 229                    | 2.09                                               |
| 1447664_x_at               | AA986860      | expressed sequence AA986860                                                              | 212439            | 109     | 227                    | 2.08                                               |
| 1436865_at                 | Slc26a11      | solute carrier family 26, member 11                                                      | 268512            | 130     | 268                    | 2.05                                               |
| 1435940_at                 | AI836758      | expressed sequence AI836758                                                              | 99719             | 214     | 433                    | 2.02                                               |
| 1449009_at                 | Tgtp          | T-cell specific GTPase                                                                   | 21822             | 225     | 456                    | 2.02                                               |
| 1439233_at                 | Tloc1         | translocation protein 1                                                                  | 69276             | 243     | 120                    | -2.02                                              |
| 1438788_at                 | D5Wsu152e     | DNA segment, Chr 5, Wayne State University 152,<br>expressed                             | 28022             | 231     | 113                    | -2.04                                              |

| Affymetrix<br>Probe set ID | Gene symbol   | Gene name                                                                    | Entrez<br>Gene ID | Control | $\alpha$ -LT $\beta$ R | Fold change<br>$\alpha$ -LT $\beta$ R /<br>Control |
|----------------------------|---------------|------------------------------------------------------------------------------|-------------------|---------|------------------------|----------------------------------------------------|
| 1437629_at                 | Arhgef19      | Rho guanine nucleotide exchange factor (GEF) 19                              | 213649            | 223     | 108                    | -2.06                                              |
| 1453040_at                 | Mcart6        | mitochondrial carrier triple repeat 6                                        | 67062             | 202     | 95                     | -2.12                                              |
| 1445322_x_at               | E430025E21Rik | RIKEN cDNA E430025E21 gene                                                   | 223593            | 453     | 212                    | -2.13                                              |
| 1426237_at                 | Sp2           | Sp2 transcription factor                                                     | 78912             | 591     | 271                    | -2.18                                              |
| 1458465_at                 | Pan3          | PAN3 polyA specific ribonuclease subunit homolog<br>( <i>S. cerevisiae</i> ) | 72587             | 260     | 118                    | -2.20                                              |
| 1423814_at                 | Ddx41         | DEAD (Asp-Glu-Ala-Asp) box polypeptide 41                                    | 72935             | 258     | 115                    | -2.24                                              |
| 1424022_at                 | Osgin1        | oxidative stress induced growth inhibitor 1                                  | 71839             | 310     | 136                    | -2.28                                              |
| 1460373_a_at               | Setd4         | SET domain containing 4                                                      | 224440            | 277     | 118                    | -2.34                                              |
| 1450337_a_at               | Nek8          | NIMA (never in mitosis gene a)-related expressed<br>kinase 8                 | 140859            | 236     | 91                     | -2.59                                              |
| 1437446_at                 | Rab5b         | RAB5B, member RAS oncogene family                                            | 19344             | 202     | 77                     | -2.61                                              |
| 1419955_at                 | Zfand3        | zinc finger, AN1-type domain 3                                               | 21769             | 312     | 94                     | -3.33                                              |
| 1460462_at                 | Med18         | mediator of RNA polymerase II transcription,<br>subunit 18 homolog (yeast)   | 67219             | 651     | 188                    | -3.45                                              |
| 1449711_at                 | Atp6v1e1      | VATPase, H <sup>+</sup> transporting, lysosomal V1 subunit E1                | 11973             | 725     | 170                    | -4.25                                              |
| 1433952_at                 | Tufm          | Tu translation elongation factor, mitochondrial                              | 233870            | 356     | 78                     | -4.59                                              |

**Table SI.f.  $\alpha$ -LT $\beta$ R-regulated probe sets at 24h.**

| Affymetrix<br>Probe set ID | Gene symbol   | Gene name                                                                                | Entrez<br>Gene ID | Control | $\alpha$ -LT $\beta$ R | Fold change<br>$\alpha$ -LT $\beta$ R /<br>Control |
|----------------------------|---------------|------------------------------------------------------------------------------------------|-------------------|---------|------------------------|----------------------------------------------------|
| 1456250_x_at               | Tgfb1         | transforming growth factor, beta induced                                                 | 21810             | 28      | 364                    | 13.14                                              |
| 1437578_at                 | Clca2         | chloride channel calcium activated 2                                                     | 80797             | 64      | 537                    | 8.33                                               |
| 1448650_a_at               | Pole          | polymerase (DNA directed), epsilon                                                       | 18973             | 34      | 239                    | 6.98                                               |
| 1421228_at                 | Ccl7          | chemokine (C-C motif) ligand 7                                                           | 20306             | 44      | 254                    | 5.77                                               |
| 1435940_at                 | AI836758      | expressed sequence AI836758                                                              | 99719             | 178     | 984                    | 5.52                                               |
| 1436002_at                 | C230013L11Rik | RIKEN cDNA C230013L11 gene                                                               | 319712            | 103     | 561                    | 5.47                                               |
| 1419463_at                 | Clca2         | chloride channel calcium activated 2                                                     | 80797             | 767     | 3948                   | 5.14                                               |
| 1449075_at                 | Exd12         | exonuclease 3"-5" domain-like 2                                                          | 97827             | 54      | 253                    | 4.68                                               |
| 1416296_at                 | Il2rg         | interleukin 2 receptor, gamma chain                                                      | 16186             | 259     | 1204                   | 4.65                                               |
| 1454592_at                 | 9430012M22Rik | RIKEN cDNA 9430012M22 gene                                                               | 77244             | 70      | 311                    | 4.47                                               |
| 1427746_x_at               | H2-K1         | histocompatibility 2, K1, K region                                                       | 14972             | 576     | 2549                   | 4.43                                               |
| 1420380_at                 | Ccl2          | chemokine (C-C motif) ligand 2                                                           | 20296             | 370     | 1604                   | 4.34                                               |
| 1418762_at                 | Cd55          | CD55 antigen                                                                             | 13136             | 263     | 1135                   | 4.31                                               |
| 1424270_at                 | Dclk1         | doublecortin-like kinase 1                                                               | 13175             | 388     | 1651                   | 4.25                                               |
| 1446190_at                 | Dclk1         | doublecortin-like kinase 1                                                               | 13175             | 217     | 904                    | 4.16                                               |
| 1424271_at                 | Dclk1         | doublecortin-like kinase 1                                                               | 13175             | 1494    | 5851                   | 3.92                                               |
| 1424923_at                 | Serpina3g     | serine (or cysteine) peptidase inhibitor, clade A,<br>member 3G                          | 20715             | 637     | 2443                   | 3.84                                               |
| 1458299_s_at               | Nfkb1e        | nuclear factor of kappa light polypeptide gene<br>enhancer in B-cells inhibitor, epsilon | 18037             | 129     | 493                    | 3.81                                               |
| 1425902_a_at               | Nfkb2         | nuclear factor of kappa light polypeptide gene<br>enhancer in B-cells 2, p49/p100        | 18034             | 239     | 908                    | 3.79                                               |
| 1449711_at                 | Atp6v1e1      | VATPase, H+ transporting, lysosomal V1 subunit E1                                        | 11973             | 137     | 511                    | 3.73                                               |
| 1460242_at                 | Cd55          | CD55 antigen                                                                             | 13136             | 327     | 1215                   | 3.71                                               |
| 1451289_at                 | Dclk1         | doublecortin-like kinase 1                                                               | 13175             | 1049    | 3857                   | 3.68                                               |
| 1436838_x_at               | Cotl1         | coactosin-like 1 (Dictyostelium)                                                         | 72042             | 110     | 399                    | 3.62                                               |
| 1435690_at                 | 2310008H09Rik | RIKEN cDNA 2310008H09 gene                                                               | 66356             | 96      | 326                    | 3.41                                               |
| 1437967_at                 |               |                                                                                          |                   | 61      | 205                    | 3.37                                               |
| 1419235_s_at               | Helb          | helicase (DNA) B                                                                         | 117599            | 114     | 373                    | 3.28                                               |
| 1429310_at                 | Flrt3         | fibronectin leucine rich transmembrane protein 3                                         | 71436             | 80      | 258                    | 3.21                                               |
| 1423125_at                 | Dclk1         | doublecortin-like kinase 1                                                               | 13175             | 140     | 431                    | 3.08                                               |
| 1416295_a_at               | Il2rg         | interleukin 2 receptor, gamma chain                                                      | 16186             | 631     | 1851                   | 2.93                                               |
| 1437473_at                 | Maf           | avian musculoaponeurotic fibrosarcoma (v-maf)<br>AS42 oncogene homolog                   | 17132             | 101     | 297                    | 2.93                                               |
| 1437463_x_at               | Tgfb1         | transforming growth factor, beta induced                                                 | 21810             | 106     | 307                    | 2.89                                               |

| Affymetrix<br>Probe set ID | Gene symbol | Gene name                                                                                        | Entrez<br>Gene ID | Control | $\alpha$ -LT $\beta$ R | Fold change<br>$\alpha$ -LT $\beta$ R /<br>Control |
|----------------------------|-------------|--------------------------------------------------------------------------------------------------|-------------------|---------|------------------------|----------------------------------------------------|
| 1415804_at                 | Cx3cl1      | chemokine (C-X3-C motif) ligand 1                                                                | 20312             | 278     | 791                    | 2.85                                               |
| 1435039_a_at               | Pip5k1a     | phosphatidylinositol-4-phosphate 5-kinase, type 1<br>alpha                                       | 18720             | 264     | 748                    | 2.83                                               |
| 1454791_a_at               | Rbbp4       | retinoblastoma binding protein 4                                                                 | 19646             | 425     | 1198                   | 2.82                                               |
| 1421392_a_at               | Birc3       | baculoviral IAP repeat-containing 3                                                              | 11796             | 274     | 770                    | 2.81                                               |
| 1423954_at                 | C3          | complement component 3                                                                           | 12266             | 419     | 1165                   | 2.78                                               |
| 1436659_at                 | Dclk1       | doublecortin-like kinase 1                                                                       | 13175             | 3111    | 8575                   | 2.76                                               |
| 1443906_at                 | Cd55        | CD55 antigen                                                                                     | 13136             | 219     | 587                    | 2.68                                               |
| 1418460_at                 | Sh3d19      | SH3 domain protein D19                                                                           | 27059             | 80      | 214                    | 2.68                                               |
| 1416516_at                 | Fscn1       | fascin homolog 1, actin bundling protein<br>(Strongylocentrotus purpuratus)                      | 14086             | 153     | 407                    | 2.65                                               |
| 1417853_at                 | Clca1       | chloride channel calcium activated 1                                                             | 12722             | 214     | 565                    | 2.64                                               |
| 1450383_at                 | Ldlr        | low density lipoprotein receptor                                                                 | 16835             | 202     | 528                    | 2.61                                               |
| 1448306_at                 | Nfkbia      | nuclear factor of kappa light chain gene enhancer in<br>B-cells inhibitor, alpha                 | 18035             | 1392    | 3564                   | 2.56                                               |
| 1429128_x_at               | Nfkb2       | nuclear factor of kappa light polypeptide gene<br>enhancer in B-cells 2, p49/p100                | 18034             | 149     | 370                    | 2.49                                               |
| 1450863_a_at               | Dclk1       | doublecortin-like kinase 1                                                                       | 13175             | 564     | 1378                   | 2.44                                               |
| 1420276_x_at               |             |                                                                                                  |                   | 217     | 529                    | 2.44                                               |
| 1416491_at                 | Numbl       | numb-like                                                                                        | 18223             | 314     | 761                    | 2.42                                               |
| 1428306_at                 | Ddit4       | DNA-damage-inducible transcript 4                                                                | 74747             | 956     | 2294                   | 2.40                                               |
| 1452595_at                 | Adamts4     | a disintegrin-like and metallopeptidase (reprolysin<br>type) with thrombospondin type 1 motif, 4 | 240913            | 169     | 398                    | 2.35                                               |
| 1455137_at                 | Rapgef5     | Rap guanine nucleotide exchange factor (GEF) 5                                                   | 217944            | 248     | 582                    | 2.35                                               |
| 1436003_at                 | Vcam1       | vascular cell adhesion molecule 1                                                                | 22329             | 507     | 1173                   | 2.32                                               |
| 1422805_a_at               | Ing3        | inhibitor of growth family, member 3                                                             | 71777             | 185     | 429                    | 2.32                                               |
| 1428929_s_at               | Slc25a26    | solute carrier family 25 (mitochondrial carrier,<br>phosphate carrier), member 26                | 67582             | 151     | 348                    | 2.31                                               |
| 1448239_at                 | Hmox1       | heme oxygenase (decycling) 1                                                                     | 15368             | 515     | 1184                   | 2.30                                               |
| 1418872_at                 | Abcb1b      | ATP-binding cassette, sub-family B (MDR/TAP),<br>member 1B                                       | 18669             | 218     | 498                    | 2.29                                               |
| 1436403_at                 | BC025575    | cDNA sequence BC025575                                                                           | 217219            | 94      | 215                    | 2.28                                               |
| 1460259_s_at               | Clca2       | chloride channel calcium activated 2                                                             | 80797             | 1512    | 3442                   | 2.28                                               |
| 1418854_at                 | Birc2       | baculoviral IAP repeat-containing 2                                                              | 11797             | 1044    | 2301                   | 2.20                                               |
| 1449014_at                 | Lactb       | lactamase, beta                                                                                  | 80907             | 139     | 305                    | 2.19                                               |

| Affymetrix<br>Probe set ID | Gene symbol   | Gene name                                                                             | Entrez<br>Gene ID | Control | $\alpha$ -LT $\beta$ R | Fold change<br>$\alpha$ -LT $\beta$ R /<br>Control |
|----------------------------|---------------|---------------------------------------------------------------------------------------|-------------------|---------|------------------------|----------------------------------------------------|
| 1449731_s_at               | Nfkbia        | nuclear factor of kappa light chain gene enhancer in B-cells inhibitor, alpha         | 18035             | 2215    | 4858                   | 2.19                                               |
| 1415803_at                 | Cx3cl1        | chemokine (C-X3-C motif) ligand 1                                                     | 20312             | 1104    | 2418                   | 2.19                                               |
| 1421939_a_at               | Stag1         | stromal antigen 1                                                                     | 20842             | 142     | 310                    | 2.19                                               |
| 1426652_at                 | Mcm3          | minichromosome maintenance deficient 3 (S. cerevisiae)                                | 17215             | 201     | 437                    | 2.17                                               |
| 1435697_a_at               | Pscdbp        | pleckstrin homology, Sec7 and coiled-coil domains, binding protein                    | 227929            | 415     | 893                    | 2.15                                               |
| 1455472_at                 | A630071D13Rik | RIKEN cDNA A630071D13 gene                                                            | 103300            | 101     | 216                    | 2.15                                               |
| 1449133_at                 | Sprr1a        | small proline-rich protein 1A                                                         | 20753             | 278     | 596                    | 2.14                                               |
| 1438905_x_at               | C030046I01Rik | RIKEN cDNA C030046I01 gene                                                            | 109284            | 215     | 454                    | 2.11                                               |
| 1451105_at                 | Vash2         | vasohibin 2                                                                           | 226841            | 101     | 210                    | 2.08                                               |
| 1431843_a_at               | Nfkbie        | nuclear factor of kappa light polypeptide gene enhancer in B-cells inhibitor, epsilon | 18037             | 104     | 217                    | 2.08                                               |
| 1425784_a_at               | Olfm1         | olfactomedin 1                                                                        | 56177             | 101     | 210                    | 2.08                                               |
| 1424792_at                 | Rpp40         | ribonuclease P 40 subunit (human)                                                     | 208366            | 128     | 267                    | 2.08                                               |
| 1419156_at                 | Sox4          | SRY-box containing gene 4                                                             | 20677             | 808     | 1630                   | 2.02                                               |
| 1453833_a_at               | Rnaseh1       | ribonuclease H1                                                                       | 19819             | 239     | 483                    | 2.02                                               |
| 1438157_s_at               | Nfkbia        | nuclear factor of kappa light chain gene enhancer in B-cells inhibitor, alpha         | 18035             | 3676    | 7387                   | 2.01                                               |
| 1454857_at                 | Rnf122        | ring finger protein 122                                                               | 68867             | 116     | 233                    | 2.00                                               |
| 1428702_at                 | Ddx28         | DEAD (Asp-Glu-Ala-Asp) box polypeptide 28                                             | 71986             | 500     | 249                    | -2.00                                              |
| 1436037_at                 | Itga4         | integrin alpha 4                                                                      | 16401             | 575     | 286                    | -2.01                                              |
| 1452728_at                 | Kirrel3       | kin of IRRE like 3 (Drosophila)                                                       | 67703             | 277     | 137                    | -2.02                                              |
| 1441921_x_at               | Esrrb         | estrogen related receptor, beta                                                       | 26380             | 206     | 102                    | -2.02                                              |
| 1441911_x_at               | Gart          | phosphoribosylglycinamide formyltransferase                                           | 14450             | 271     | 134                    | -2.03                                              |
| 1459818_x_at               | Zmym3         | zinc finger, MYM-type 3                                                               | 56364             | 556     | 274                    | -2.03                                              |
| 1423653_at                 | Atp1a1        | ATPase, Na <sup>+</sup> /K <sup>+</sup> transporting, alpha 1 polypeptide             | 11928             | 4056    | 1989                   | -2.04                                              |
| 1447885_x_at               | Nedd9         | neural precursor cell expressed, developmentally down-regulated gene 9                | 18003             | 484     | 236                    | -2.05                                              |
| 1452848_at                 | LOC547127     | similar to KIAA1423 protein                                                           | 547127            | 987     | 482                    | -2.05                                              |
| 1437942_x_at               | Tube1         | epsilon-tubulin 1                                                                     | 71924             | 621     | 303                    | -2.05                                              |
| 1424817_at                 | Spefl         | sperm flagellar 1                                                                     | 70997             | 272     | 131                    | -2.07                                              |
| 1455861_at                 | Epb4.115      | erythrocyte protein band 4.1-like 5                                                   | 226352            | 202     | 97                     | -2.08                                              |
| 1438438_at                 | 2900002H16Rik | RIKEN cDNA 2900002H16 gene                                                            | 75695             | 627     | 301                    | -2.08                                              |
| 1427853_a_at               | Hspb1         | heat shock protein 1                                                                  | 15507             | 592     | 284                    | -2.09                                              |

| Affymetrix<br>Probe set ID | Gene symbol   | Gene name                                                                 | Entrez<br>Gene ID | Control | $\alpha$ -LT $\beta$ R | Fold change<br>$\alpha$ -LT $\beta$ R /<br>Control |
|----------------------------|---------------|---------------------------------------------------------------------------|-------------------|---------|------------------------|----------------------------------------------------|
| 1436151_x_at               | BC031781      | cDNA sequence BC031781                                                    | 208768            | 851     | 406                    | -2.10                                              |
| 1456566_x_at               | Rbm14         | RNA binding motif protein 14                                              | 56275             | 1211    | 578                    | -2.10                                              |
| 1449827_at                 | Acan          | aggrecan                                                                  | 11595             | 2346    | 1082                   | -2.17                                              |
| 1451071_a_at               | Atp1a1        | ATPase, Na <sup>+</sup> /K <sup>+</sup> transporting, alpha 1 polypeptide | 11928             | 5665    | 2609                   | -2.17                                              |
| 1438636_s_at               | Susd5         | sushi domain containing 5                                                 | 382111            | 1028    | 461                    | -2.23                                              |
| 1456510_x_at               | Ubie          | UbiE-YGHL1 fusion protein                                                 | 393082            | 877     | 390                    | -2.25                                              |
| 1416147_at                 | Hspa4         | heat shock protein 4                                                      | 15525             | 1358    | 599                    | -2.27                                              |
| 1453530_at                 |               |                                                                           |                   | 216     | 95                     | -2.28                                              |
| 1456291_x_at               | Scx           | scleraxis                                                                 | 20289             | 307     | 135                    | -2.28                                              |
| 1426909_at                 | Uck2          | uridine-cytidine kinase 2                                                 | 80914             | 959     | 420                    | -2.28                                              |
| 1426109_a_at               | Slc14a2       | solute carrier family 14 (urea transporter), member 2                     | 27411             | 288     | 124                    | -2.32                                              |
| 1447982_at                 | 1110008P14Rik | RIKEN cDNA 1110008P14 gene                                                | 73737             | 1177    | 486                    | -2.42                                              |
| 1450115_at                 | Gnaq          | guanine nucleotide binding protein, alpha q polypeptide                   | 14682             | 427     | 169                    | -2.53                                              |
| 1453483_at                 | 1700023E05Rik | RIKEN cDNA 1700023E05 gene                                                | 71868             | 341     | 131                    | -2.60                                              |
| 1423294_at                 | Mest          | mesoderm specific transcript                                              | 17294             | 3233    | 1226                   | -2.64                                              |
| 1452292_at                 | Ap2b1         | adaptor-related protein complex 2, beta 1 subunit                         | 71770             | 1822    | 684                    | -2.67                                              |
| 1419974_at                 | Scp2          | sterol carrier protein 2, liver                                           | 20280             | 420     | 149                    | -2.81                                              |
| 1432350_at                 | Sync          | syncoilin                                                                 | 68828             | 664     | 230                    | -2.88                                              |
| 1420931_at                 | Mapk8         | mitogen activated protein kinase 8                                        | 26419             | 221     | 68                     | -3.24                                              |
| 1438403_s_at               | Ramp2         | receptor (calcitonin) activity modifying protein 2                        | 54409             | 580     | 132                    | -4.39                                              |



**Table SII. SMC mRNAs stimulated by TNF,  $\alpha$ -LT $\beta$ R, and by TNF plus  $\alpha$ -LT $\beta$ R at 24h reveals extent of transcription crosstalk.**

SMCs were stimulated as described in Fig. 1. 24h later, microarrays were prepared and analyzed as described in Materials and Methods. Results are displayed as Venn diagram Fig. S3. Note that 85 genes were recruited by the combined activation of TNF plus  $\alpha$ -LT $\beta$ R versus each agonist alone. Gene symbols and gene names are indicated for ease of reading. Genes were arranged according to foldchange T/C (a), L/C (b), and TL/C (c) with the corresponding p Value (two-sided, paired T test) indicated in the last row.

**Table SII.a. TNF stimulates 86 genes at 24h.**

| Affymetrix Probe set ID | Gene symbol | Gene name                                                                                | Entrez Gene ID | Mean C | Mean T | Mean L | Mean TL | Fold change T/C | Fold change L/C | Fold change TL/C | p Value of T-test |
|-------------------------|-------------|------------------------------------------------------------------------------------------|----------------|--------|--------|--------|---------|-----------------|-----------------|------------------|-------------------|
| 1418126_at              | Ccl5        | chemokine (C-C motif) ligand 5                                                           | 20304          | 13     | 1460   | 257    | 5280    | 114.57          | 20.15           | 414.30           | 0.0001            |
| 1421228_at              | Ccl7        | chemokine (C-C motif) ligand 7                                                           | 20306          | 22     | 899    | 246    | 2303    | 41.62           | 11.39           | 106.61           | 0.01              |
| 1420380_at              | Ccl2        | chemokine (C-C motif) ligand 2                                                           | 20296          | 111    | 2695   | 680    | 6319    | 24.35           | 6.14            | 57.10            | 0.01              |
| 1448881_at              | Hp          | haptoglobin                                                                              | 15439          | 85     | 1148   | 130    | 1212    | 13.56           | 1.53            | 14.32            | 0.02              |
| 1418133_at              | Bcl3        | B-cell leukemia/lymphoma 3                                                               | 12051          | 21     | 211    | 142    | 275     | 10.20           | 6.90            | 13.34            | 0.02              |
| 1427747_a_at            | Lcn2        | lipocalin 2                                                                              | 16819          | 334    | 3132   | 724    | 3515    | 9.39            | 2.17            | 10.54            | 0.04              |
| 1450826_a_at            | Saa3        | serum amyloid A 3                                                                        | 20210          | 95     | 867    | 101    | 1015    | 9.11            | 1.06            | 10.66            | 0.03              |
| 1450696_at              | Psmb9       | proteasome (prosome, macropain) subunit, beta type 9 (large multifunctional peptidase 2) | 16912          | 31     | 270    | 173    | 637     | 8.83            | 5.65            | 20.80            | 0.005             |
| 1423954_at              | C3          | complement component 3                                                                   | 12266          | 500    | 4353   | 2107   | 7194    | 8.70            | 4.21            | 14.38            | 0.04              |
| 1435906_x_at            | Gbp2        | guanylate nucleotide binding protein 2                                                   | 14469          | 291    | 2526   | 660    | 4228    | 8.68            | 2.27            | 14.53            | 0.005             |
| 1453196_a_at            | Oasl2       | 2'-5' oligoadenylate synthetase-like 2                                                   | 23962          | 84     | 692    | 247    | 1463    | 8.25            | 2.95            | 17.45            | 0.009             |
| 1451426_at              | Dhx58       | DEXH (Asp-Glu-X-His) box polypeptide 58                                                  | 80861          | 38     | 300    | 117    | 444     | 7.86            | 3.07            | 11.63            | 0.04              |
| 1422962_a_at            | Psmb8       | proteasome (prosome, macropain) subunit, beta type 8 (large multifunctional peptidase 7) | 16913          | 117    | 783    | 291    | 1419    | 6.71            | 2.49            | 12.17            | 0.005             |
| 1418930_at              | Cxcl10      | chemokine (C-X-C motif) ligand 10                                                        | 15945          | 32     | 201    | 364    | 1554    | 6.29            | 11.37           | 48.60            | 0.03              |
| 1423555_a_at            | Ifi44       | interferon-induced protein 44                                                            | 99899          | 285    | 1749   | 526    | 2917    | 6.13            | 1.84            | 10.22            | 0.03              |
| 1458299_s_at            | Nfkbie      | nuclear factor of kappa light polypeptide gene enhancer in B-cells inhibitor, epsilon    | 18037          | 67     | 398    | 365    | 1156    | 5.96            | 5.47            | 17.31            | 0.02              |
| 1418392_a_at            | Gbp3        | guanylate nucleotide binding protein 3                                                   | 55932          | 268    | 1594   | 533    | 3340    | 5.95            | 1.99            | 12.46            | 0.01              |
| 1418580_at              | Rtp4        | receptor transporter protein 4                                                           | 67775          | 724    | 3892   | 1431   | 5403    | 5.37            | 1.98            | 7.46             | 0.02              |

| Affymetrix Probe set ID | Gene symbol | Gene name                                                    | Entrez Gene ID | Mean C | Mean T | Mean L | Mean TL | Fold change T/C | Fold change L/C | Fold change TL/C | p Value of T-test |
|-------------------------|-------------|--------------------------------------------------------------|----------------|--------|--------|--------|---------|-----------------|-----------------|------------------|-------------------|
| 1449009_at              | Tgtp        | T-cell specific GTPase                                       | 21822          | 345    | 1748   | 602    | 3794    | 5.06            | 1.74            | 10.99            | 0.02              |
| 1453304_s_at            | Ly6e        | lymphocyte antigen 6 complex, locus E                        | 17069          | 559    | 2775   | 1030   | 4701    | 4.96            | 1.84            | 8.40             | 0.005             |
| 1424921_at              | Brd4        | bromodomain containing 4                                     | 57261          | 755    | 3507   | 987    | 3990    | 4.65            | 1.31            | 5.29             | 0.008             |
| 1450783_at              | Ifit1       | interferon-induced protein with tetratricopeptide repeats 1  | 15957          | 536    | 2411   | 913    | 3923    | 4.50            | 1.70            | 7.31             | 0.05              |
| 1424067_at              | Icam1       | intercellular adhesion molecule                              | 15894          | 401    | 1742   | 1455   | 4417    | 4.35            | 3.63            | 11.03            | 0.02              |
| 1418718_at              | Cxcl16      | chemokine (C-X-C motif) ligand 16                            | 66102          | 248    | 1055   | 507    | 1856    | 4.26            | 2.05            | 7.49             | 0.0005            |
| 1428942_at              | Mt2         | metallothionein 2                                            | 17750          | 1717   | 7241   | 4059   | 9659    | 4.22            | 2.36            | 5.63             | 0.008             |
| 1425336_x_at            | H2-K1       | histocompatibility 2, K1, K region                           | 14972          | 2371   | 9605   | 4787   | 11557   | 4.05            | 2.02            | 4.87             | 0.001             |
| 1449591_at              | Casp4       | caspase 4, apoptosis-related cysteine peptidase              | 12363          | 269    | 1074   | 780    | 1271    | 4.00            | 2.91            | 4.73             | 0.003             |
| 1438676_at              | Mpa2l       | macrophage activation 2 like                                 | 100702         | 64     | 249    | 96     | 379     | 3.90            | 1.51            | 5.94             | 0.02              |
| 1448162_at              | Vcam1       | vascular cell adhesion molecule 1                            | 22329          | 1841   | 7170   | 4474   | 10628   | 3.89            | 2.43            | 5.77             | 0.004             |
| 1419132_at              | Tlr2        | toll-like receptor 2                                         | 24088          | 373    | 1305   | 790    | 1825    | 3.50            | 2.12            | 4.89             | 0.004             |
| 1424518_at              | BC020489    | cDNA sequence BC020489                                       | 223672         | 130    | 443    | 160    | 563     | 3.41            | 1.23            | 4.33             | 0.04              |
| 1448550_at              | Lbp         | lipopolysaccharide binding protein                           | 16803          | 142    | 482    | 188    | 468     | 3.39            | 1.33            | 3.30             | 0.05              |
| 1417856_at              | Relb        | avian reticuloendotheliosis viral (v-rel) oncogene related B | 19698          | 179    | 601    | 367    | 847     | 3.35            | 2.05            | 4.73             | 0.005             |
| 1448632_at              | Psmb10      | proteasome (prosome, macropain) subunit, beta type 10        | 19171          | 334    | 1109   | 663    | 2291    | 3.32            | 1.98            | 6.85             | 0.01              |
| 1451784_x_at            | H2-D1       | histocompatibility 2, D region locus 1                       | 14964          | 1874   | 6157   | 2927   | 8183    | 3.29            | 1.56            | 4.37             | 0.004             |
| 1419043_a_at            | Iigp1       | interferon inducible GTPase 1                                | 60440          | 483    | 1569   | 702    | 2624    | 3.25            | 1.45            | 5.44             | 0.03              |
| 1417314_at              | Cfb         | complement factor B                                          | 14962          | 132    | 424    | 134    | 565     | 3.20            | 1.01            | 4.27             | 0.02              |
| 1420499_at              | Gch1        | GTP cyclohydrolase 1                                         | 14528          | 175    | 554    | 224    | 563     | 3.16            | 1.28            | 3.21             | 0.02              |
| 1425545_x_at            | H2-L        | histocompatibility 2, D region                               | 14980          | 2172   | 6795   | 3180   | 8778    | 3.13            | 1.46            | 4.04             | 0.004             |
| 1417244_a_at            | Irf7        | interferon regulatory factor 7                               | 54123          | 286    | 865    | 384    | 1283    | 3.03            | 1.35            | 4.49             | 0.02              |
| 1450034_at              | Stat1       | signal transducer and activator of transcription 1           | 20846          | 946    | 2819   | 1566   | 4274    | 2.98            | 1.66            | 4.52             | 0.01              |
| 1449556_at              | H2-T23      | histocompatibility 2, T region locus 23                      | 15040          | 1254   | 3683   | 1665   | 5016    | 2.94            | 1.33            | 4.00             | 0.007             |
| 1449025_at              | Ifit3       | interferon-induced protein with tetratricopeptide repeats 3  | 15959          | 1358   | 3864   | 1711   | 6053    | 2.84            | 1.26            | 4.46             | 0.03              |
| 1452349_x_at            | Ifi205      | interferon activated gene 205                                | 226695         | 651    | 1826   | 971    | 2806    | 2.81            | 1.49            | 4.31             | 0.03              |

| Affymetrix Probe set ID | Gene symbol | Gene name                                                               | Entrez Gene ID | Mean C | Mean T | Mean L | Mean TL | Fold change T/C | Fold change L/C | Fold change TL/C | p Value of T-test |
|-------------------------|-------------|-------------------------------------------------------------------------|----------------|--------|--------|--------|---------|-----------------|-----------------|------------------|-------------------|
| 1451564_at              | Parp14      | poly (ADP-ribose) polymerase family, member 14                          | 547253         | 164    | 459    | 345    | 1012    | 2.79            | 2.10            | 6.16             | 0.03              |
| 1417292_at              | Ifi47       | interferon gamma inducible protein 47                                   | 15953          | 871    | 2393   | 1567   | 3886    | 2.75            | 1.80            | 4.46             | 0.01              |
| 1433699_at              | Tnfaip3     | tumor necrosis factor, alpha-induced protein 3                          | 21929          | 489    | 1330   | 1090   | 2311    | 2.72            | 2.23            | 4.72             | 0.01              |
| 1457644_s_at            | Cxcl1       | chemokine (C-X-C motif) ligand 1                                        | 14825          | 292    | 794    | 504    | 1303    | 2.72            | 1.73            | 4.46             | 0.02              |
| 1417172_at              | Ube2l6      | ubiquitin-conjugating enzyme E2L 6                                      | 56791          | 129    | 347    | 183    | 377     | 2.68            | 1.41            | 2.91             | 0.03              |
| 1417793_at              | Iigp2       | interferon inducible GTPase 2                                           | 54396          | 423    | 1103   | 632    | 1864    | 2.61            | 1.49            | 4.40             | 0.01              |
| 1439068_at              | Arts1       | type 1 tumor necrosis factor receptor shedding aminopeptidase regulator | 80898          | 178    | 464    | 270    | 557     | 2.61            | 1.52            | 3.13             | 0.02              |
| 1417130_s_at            | Angptl4     | angiopoietin-like 4                                                     | 57875          | 404    | 1039   | 935    | 1402    | 2.57            | 2.32            | 3.47             | 0.009             |
| 1434380_at              | Gbp6        | guanylate binding protein 6                                             | 229900         | 265    | 677    | 333    | 1229    | 2.55            | 1.26            | 4.64             | 0.02              |
| 1424148_a_at            | AW049765    | expressed sequence AW049765                                             | 106766         | 132    | 335    | 224    | 342     | 2.53            | 1.69            | 2.59             | 0.04              |
| 1426276_at              | Ifih1       | interferon induced with helicase C domain 1                             | 71586          | 629    | 1582   | 876    | 2178    | 2.52            | 1.39            | 3.47             | 0.02              |
| 1417961_a_at            | Trim30      | tripartite motif protein 30                                             | 20128          | 507    | 1271   | 548    | 1691    | 2.51            | 1.08            | 3.34             | 0.05              |
| 1422557_s_at            | Mt1         | metallothionein 1                                                       | 17748          | 2025   | 4960   | 3511   | 6722    | 2.45            | 1.73            | 3.32             | 0.01              |
| 1438868_at              | Phf11       | PHD finger protein 11                                                   | 219131         | 902    | 2203   | 1192   | 2948    | 2.44            | 1.32            | 3.27             | 0.04              |
| 1417141_at              | Igtp        | interferon gamma induced GTPase                                         | 16145          | 347    | 847    | 581    | 1144    | 2.44            | 1.67            | 3.30             | 0.02              |
| 1421812_at              | Tapbp       | TAP binding protein                                                     | 21356          | 2751   | 6688   | 3917   | 8239    | 2.43            | 1.42            | 2.99             | 0.004             |
| 1425603_at              | Tmem176a    | transmembrane protein 176A                                              | 66058          | 982    | 2377   | 2302   | 3272    | 2.42            | 2.34            | 3.33             | 0.05              |
| 1443698_at              | Fbxo39      | F-box protein 39                                                        | 327959         | 796    | 1926   | 1036   | 2663    | 2.42            | 1.30            | 3.34             | 0.05              |
| 1454783_at              | Il13ra1     | interleukin 13 receptor, alpha 1                                        | 16164          | 151    | 349    | 261    | 535     | 2.31            | 1.73            | 3.54             | 0.009             |
| 1438561_x_at            | Tmem180     | transmembrane protein 180                                               | 75146          | 121    | 273    | 243    | 274     | 2.26            | 2.01            | 2.27             | 0.05              |
| 1416897_at              | Parp9       | poly (ADP-ribose) polymerase family, member 9                           | 80285          | 620    | 1398   | 869    | 1983    | 2.25            | 1.40            | 3.20             | 0.02              |
| 1454974_at              | Ntn1        | netrin 1                                                                | 18208          | 254    | 572    | 433    | 828     | 2.25            | 1.71            | 3.26             | 0.04              |
| 1438037_at              | Herc5       | hect domain and RLD 5                                                   | 67138          | 264    | 591    | 364    | 855     | 2.24            | 1.38            | 3.25             | 0.02              |
| 1437303_at              | Il6st       | interleukin 6 signal transducer                                         | 16195          | 490    | 1082   | 621    | 1055    | 2.21            | 1.27            | 2.15             | 0.01              |
| 1436172_at              | Samd9l      | sterile alpha motif domain containing 9-like                            | 209086         | 368    | 808    | 507    | 984     | 2.20            | 1.38            | 2.68             | 0.02              |
| 1448380_at              | Lgals3bp    | lectin, galactoside-binding, soluble, 3 binding protein                 | 19039          | 2304   | 5060   | 2725   | 6328    | 2.20            | 1.18            | 2.75             | 0.02              |
| 1415899_at              | Junb        | Jun-B oncogene                                                          | 16477          | 340    | 743    | 680    | 1038    | 2.19            | 2.00            | 3.06             | 0.005             |
| 1443858_at              |             |                                                                         | 552905         | 581    | 1256   | 709    | 1670    | 2.16            | 1.22            | 2.87             | 0.02              |

| Affymetrix Probe set ID | Gene symbol | Gene name                                                                                             | Entrez Gene ID | Mean C | Mean T | Mean L | Mean TL | Fold change T/C | Fold change L/C | Fold change TL/C | p Value of T-test |
|-------------------------|-------------|-------------------------------------------------------------------------------------------------------|----------------|--------|--------|--------|---------|-----------------|-----------------|------------------|-------------------|
| 1456494_a_at            | AI451617    | expressed sequence AI451617                                                                           | 209387         | 245    | 528    | 293    | 720     | 2.15            | 1.19            | 2.94             | 0.05              |
| 1436778_at              | Cybb        | cytochrome b-245, beta polypeptide                                                                    | 13058          | 115    | 246    | 131    | 341     | 2.14            | 1.14            | 2.97             | 0.006             |
| 1420088_at              | Nfkbia      | nuclear factor of kappa light chain gene enhancer in B-cells inhibitor, alpha                         | 18035          | 6521   | 13866  | 13479  | 16284   | 2.13            | 2.07            | 2.50             | 0.004             |
| 1429184_at              | Gvin1       | GTPase, very large interferon inducible 1                                                             | 74558          | 1572   | 3330   | 1836   | 4146    | 2.12            | 1.17            | 2.64             | 0.04              |
| 1435208_at              | Dtx3l       | deltex 3-like (Drosophila)                                                                            | 209200         | 577    | 1223   | 860    | 1699    | 2.12            | 1.49            | 2.94             | 0.02              |
| 1417853_at              | Clca1       | chloride channel calcium activated 1                                                                  | 12722          | 142    | 298    | 367    | 541     | 2.11            | 2.59            | 3.82             | 0.05              |
| 1422573_at              | Ampd3       | AMP deaminase 3                                                                                       | 11717          | 299    | 624    | 511    | 1035    | 2.09            | 1.71            | 3.47             | 0.03              |
| 1440169_x_at            | Ifnar2      | interferon (alpha and beta) receptor 2                                                                | 15976          | 375    | 779    | 595    | 1031    | 2.08            | 1.59            | 2.75             | 0.04              |
| 1426278_at              | Ifi27       | interferon, alpha-inducible protein 27                                                                | 76933          | 330    | 688    | 336    | 813     | 2.08            | 1.02            | 2.46             | 0.04              |
| 1421392_a_at            | Birc3       | baculoviral IAP repeat-containing 3                                                                   | 11796          | 417    | 869    | 923    | 2071    | 2.08            | 2.21            | 4.96             | 0.02              |
| 1452178_at              | Plec1       | plectin 1                                                                                             | 18810          | 230    | 476    | 288    | 589     | 2.07            | 1.25            | 2.56             | 0.005             |
| 1442819_at              | Rhbdl2      | rhomboid, veinlet-like 2 (Drosophila)                                                                 | 230726         | 159    | 328    | 392    | 501     | 2.06            | 2.46            | 3.15             | 0.005             |
| 1436562_at              | Ddx58       | DEAD (Asp-Glu-Ala-Asp) box polypeptide 58                                                             | 230073         | 1245   | 2520   | 2170   | 4150    | 2.02            | 1.74            | 3.33             | 0.008             |
| 1425519_a_at            | Cd74        | CD74 antigen (invariant polypeptide of major histocompatibility complex, class II antigen-associated) | 16149          | 129    | 259    | 152    | 350     | 2.01            | 1.18            | 2.72             | 0.02              |

**Table SII.b.  $\alpha$ -LT $\beta$ R stimulates 23 genes at 24h.**

| Affymetrix Probe set ID | Gene symbol | Gene name                                                                             | Entrez Gene ID | Mean C | Mean T | Mean L | Mean TL | Fold change T/C | Fold change L/C | Fold change TL/C | p Value of T-test |
|-------------------------|-------------|---------------------------------------------------------------------------------------|----------------|--------|--------|--------|---------|-----------------|-----------------|------------------|-------------------|
| 1418930_at              | Cxcl10      | chemokine (C-X-C motif) ligand 10                                                     | 15945          | 32     | 201    | 364    | 1554    | 6.29            | 11.37           | 48.60            | 0.02              |
| 1422562_at              | Rrad        | Ras-related associated with diabetes                                                  | 56437          | 26     | 125    | 239    | 260     | 4.73            | 9.07            | 9.86             | 0.05              |
| 1425902_a_at            | Nfkb2       | nuclear factor of kappa light polypeptide gene enhancer in B-cells 2, p49/p100        | 18034          | 160    | 539    | 958    | 1274    | 3.37            | 5.99            | 7.96             | 0.02              |
| 1458299_s_at            | Nfkbie      | nuclear factor of kappa light polypeptide gene enhancer in B-cells inhibitor, epsilon | 18037          | 67     | 398    | 365    | 1156    | 5.96            | 5.47            | 17.31            | 0.03              |
| 1424271_at              | Dclk1       | doublecortin-like kinase 1                                                            | 13175          | 840    | 2240   | 4326   | 4604    | 2.67            | 5.15            | 5.48             | 0.05              |
| 1424067_at              | Icam1       | intercellular adhesion molecule                                                       | 15894          | 401    | 1742   | 1455   | 4417    | 4.35            | 3.63            | 11.03            | 0.04              |
| 1449591_at              | Casp4       | caspase 4, apoptosis-related cysteine peptidase                                       | 12363          | 269    | 1074   | 780    | 1271    | 4.00            | 2.91            | 4.73             | 0.004             |
| 1419157_at              | Sox4        | SRY-box containing gene 4                                                             | 20677          | 580    | 1087   | 1552   | 1419    | 1.88            | 2.68            | 2.45             | 0.004             |
| 1417853_at              | Clca1       | chloride channel calcium activated 1                                                  | 12722          | 142    | 298    | 367    | 541     | 2.11            | 2.59            | 3.82             | 0.05              |
| 1442819_at              | Rhbdl2      | rhomoid, veinlet-like 2 (Drosophila)                                                  | 230726         | 159    | 328    | 392    | 501     | 2.06            | 2.46            | 3.15             | 0.004             |
| 1448162_at              | Vcam1       | vascular cell adhesion molecule 1                                                     | 22329          | 1841   | 7170   | 4474   | 10628   | 3.89            | 2.43            | 5.77             | 0.02              |
| 1418240_at              | Gbp2        | guanylate nucleotide binding protein 2                                                | 14469          | 292    | 2362   | 690    | 3721    | 8.09            | 2.36            | 12.75            | 0.03              |
| 1415803_at              | Cx3cl1      | chemokine (C-X3-C motif) ligand 1                                                     | 20312          | 621    | 1128   | 1461   | 2593    | 1.82            | 2.35            | 4.18             | 0.04              |
| 1433699_at              | Tnfaip3     | tumor necrosis factor, alpha-induced protein 3                                        | 21929          | 489    | 1330   | 1090   | 2311    | 2.72            | 2.23            | 4.72             | 0.04              |
| 1417936_at              | Ccl9        | chemokine (C-C motif) ligand 9                                                        | 20308          | 866    | 1164   | 1914   | 3403    | 1.34            | 2.21            | 3.93             | 0.03              |
| 1421392_a_at            | Birc3       | baculoviral IAP repeat-containing 3                                                   | 11796          | 417    | 869    | 923    | 2071    | 2.08            | 2.21            | 4.96             | 0.004             |
| 1457780_at              | Stx11       | syntaxin 11                                                                           | 74732          | 246    | 468    | 523    | 943     | 1.90            | 2.13            | 3.84             | 0.003             |
| 1419132_at              | Tlr2        | toll-like receptor 2                                                                  | 24088          | 373    | 1305   | 790    | 1825    | 3.50            | 2.12            | 4.89             | 0.005             |
| 1420088_at              | Nfkbia      | nuclear factor of kappa light chain gene enhancer in B-cells inhibitor, alpha         | 18035          | 6521   | 13866  | 13479  | 16284   | 2.13            | 2.07            | 2.50             | 0.005             |
| 1417856_at              | Relb        | avian reticuloendotheliosis viral (v-rel) oncogene related B                          | 19698          | 179    | 601    | 367    | 847     | 3.35            | 2.05            | 4.73             | 0.02              |
| 1418718_at              | Cxcl16      | chemokine (C-X-C motif) ligand 16                                                     | 66102          | 248    | 1055   | 507    | 1856    | 4.26            | 2.05            | 7.49             | 0.01              |
| 1425336_x_at            | H2-K1       | histocompatibility 2, K1, K region                                                    | 14972          | 2371   | 9605   | 4787   | 11557   | 4.05            | 2.02            | 4.87             | 0.005             |
| 1415899_at              | Junb        | Jun-B oncogene                                                                        | 16477          | 340    | 743    | 680    | 1038    | 2.19            | 2.00            | 3.06             | 0.01              |

**Table SII.c. TNF +  $\alpha$ -LT $\beta$ R stimulates 177 genes at 24h.**

| Affymetrix<br>Probe set ID | Gene symbol | Gene name                                                                                      | Entrez<br>Gene<br>ID | Mean<br>C | Mean<br>T | Mean<br>L | Mean<br>TL | Fold<br>change<br>T/C | Fold<br>change<br>L/C | Fold<br>change<br>TL/C | p Value<br>of<br>T-test |
|----------------------------|-------------|------------------------------------------------------------------------------------------------|----------------------|-----------|-----------|-----------|------------|-----------------------|-----------------------|------------------------|-------------------------|
| 1418126_at                 | Ccl5        | chemokine (C-C motif) ligand 5                                                                 | 20304                | 13        | 1460      | 257       | 5280       | 114.57                | 20.15                 | 414.30                 | 0.0004                  |
| 1421228_at                 | Ccl7        | chemokine (C-C motif) ligand 7                                                                 | 20306                | 22        | 899       | 246       | 2303       | 41.62                 | 11.39                 | 106.61                 | 0.004                   |
| 1420380_at                 | Ccl2        | chemokine (C-C motif) ligand 2                                                                 | 20296                | 111       | 2695      | 680       | 6319       | 24.35                 | 6.14                  | 57.10                  | 0.005                   |
| 1418930_at                 | Cxcl10      | chemokine (C-X-C motif) ligand 10                                                              | 15945                | 32        | 201       | 364       | 1554       | 6.29                  | 11.37                 | 48.60                  | 0.005                   |
| 1450696_at                 | Psbm9       | proteasome (prosome, macropain)<br>subunit, beta type 9 (large<br>multifunctional peptidase 2) | 16912                | 31        | 270       | 173       | 637        | 8.83                  | 5.65                  | 20.80                  | 0.003                   |
| 1429947_a_at               | Zbp1        | Z-DNA binding protein 1                                                                        | 58203                | 15        | 181       | 29        | 289        | 11.83                 | 1.90                  | 18.87                  | 0.02                    |
| 1453196_a_at               | Oasl2       | 2'-5' oligoadenylate synthetase-like 2                                                         | 23962                | 84        | 692       | 247       | 1463       | 8.25                  | 2.95                  | 17.45                  | 0.005                   |
| 1458299_s_at               | Nfkbie      | nuclear factor of kappa light<br>polypeptide gene enhancer in B-cells<br>inhibitor, epsilon    | 18037                | 67        | 398       | 365       | 1156       | 5.96                  | 5.47                  | 17.31                  | 0.009                   |
| 1435906_x_at               | Gbp2        | guanylate nucleotide binding protein<br>2                                                      | 14469                | 291       | 2526      | 660       | 4228       | 8.68                  | 2.27                  | 14.53                  | 0.003                   |
| 1423954_at                 | C3          | complement component 3                                                                         | 12266                | 500       | 4353      | 2107      | 7194       | 8.70                  | 4.21                  | 14.38                  | 0.02                    |
| 1460469_at                 | Tnfrsf9     | tumor necrosis factor receptor<br>superfamily, member 9                                        | 21942                | 49        | 356       | 139       | 699        | 7.32                  | 2.86                  | 14.35                  | 0.005                   |
| 1448881_at                 | Hp          | haptoglobin                                                                                    | 15439                | 85        | 1148      | 130       | 1212       | 13.56                 | 1.53                  | 14.32                  | 0.02                    |
| 1418133_at                 | Bcl3        | B-cell leukemia/lymphoma 3                                                                     | 12051                | 21        | 211       | 142       | 275        | 10.20                 | 6.90                  | 13.34                  | 0.01                    |
| 1418392_a_at               | Gbp3        | guanylate nucleotide binding protein<br>3                                                      | 55932                | 268       | 1594      | 533       | 3340       | 5.95                  | 1.99                  | 12.46                  | 0.003                   |
| 1422962_a_at               | Psbm8       | proteasome (prosome, macropain)<br>subunit, beta type 8 (large<br>multifunctional peptidase 7) | 16913                | 117       | 783       | 291       | 1419       | 6.71                  | 2.49                  | 12.17                  | 0.003                   |
| 1451426_at                 | Dhx58       | DEXH (Asp-Glu-X-His) box<br>polypeptide 58                                                     | 80861                | 38        | 300       | 117       | 444        | 7.86                  | 3.07                  | 11.63                  | 0.02                    |
| 1449277_at                 | Ccl19       | chemokine (C-C motif) ligand 19                                                                | 24047                | 71        | 186       | 191       | 816        | 2.63                  | 2.71                  | 11.55                  | 0.01                    |
| 1451655_at                 | Slfn8       | schlafen 8                                                                                     | 276950               | 20        | 178       | 83        | 224        | 8.85                  | 4.12                  | 11.16                  | 0.04                    |
| 1424067_at                 | Icam1       | intercellular adhesion molecule                                                                | 15894                | 401       | 1742      | 1455      | 4417       | 4.35                  | 3.63                  | 11.03                  | 0.006                   |
| 1449009_at                 | Tgtp        | T-cell specific GTPase                                                                         | 21822                | 345       | 1748      | 602       | 3794       | 5.06                  | 1.74                  | 10.99                  | 0.004                   |
| 1450826_a_at               | Saa3        | serum amyloid A 3                                                                              | 20210                | 95        | 867       | 101       | 1015       | 9.11                  | 1.06                  | 10.66                  | 0.03                    |
| 1427747_a_at               | Lcn2        | lipocalin 2                                                                                    | 16819                | 334       | 3132      | 724       | 3515       | 9.39                  | 2.17                  | 10.54                  | 0.04                    |
| 1424923_at                 | Serpina3g   | serine (or cysteine) peptidase<br>inhibitor, clade A, member 3G                                | 20715                | 40        | 98        | 246       | 407        | 2.46                  | 6.20                  | 10.27                  | 0.04                    |
| 1423555_a_at               | Ifi44       | interferon-induced protein 44                                                                  | 99899                | 285       | 1749      | 526       | 2917       | 6.13                  | 1.84                  | 10.22                  | 0.01                    |

| Affymetrix<br>Probe set ID | Gene symbol | Gene name                                                                      | Entrez<br>Gene<br>ID | Mean<br>C | Mean<br>T | Mean<br>L | Mean<br>TL | Fold<br>change<br>T/C | Fold<br>change<br>L/C | Fold<br>change<br>TL/C | p Value<br>of<br>T-test |
|----------------------------|-------------|--------------------------------------------------------------------------------|----------------------|-----------|-----------|-----------|------------|-----------------------|-----------------------|------------------------|-------------------------|
| 1422562_at                 | Rrad        | Ras-related associated with diabetes                                           | 56437                | 26        | 125       | 239       | 260        | 4.73                  | 9.07                  | 9.86                   | 0.03                    |
| 1451777_at                 | BC013672    | cDNA sequence BC013672                                                         | 234311               | 30        | 171       | 59        | 273        | 5.70                  | 1.97                  | 9.09                   | 0.04                    |
| 1453304_s_at               | Ly6e        | lymphocyte antigen 6 complex, locus E                                          | 17069                | 559       | 2775      | 1030      | 4701       | 4.96                  | 1.84                  | 8.40                   | 0.004                   |
| 1425902_a_at               | Nfkb2       | nuclear factor of kappa light polypeptide gene enhancer in B-cells 2, p49/p100 | 18034                | 160       | 539       | 958       | 1274       | 3.37                  | 5.99                  | 7.96                   | 0.009                   |
| 1418718_at                 | Cxcl16      | chemokine (C-X-C motif) ligand 16                                              | 66102                | 248       | 1055      | 507       | 1856       | 4.26                  | 2.05                  | 7.49                   | 0.0004                  |
| 1418580_at                 | Rtp4        | receptor transporter protein 4                                                 | 67775                | 724       | 3892      | 1431      | 5403       | 5.37                  | 1.98                  | 7.46                   | 0.01                    |
| 1450783_at                 | Ifit1       | interferon-induced protein with tetratricopeptide repeats 1                    | 15957                | 536       | 2411      | 913       | 3923       | 4.50                  | 1.70                  | 7.31                   | 0.02                    |
| 1435940_at                 | AI836758    | expressed sequence AI836758                                                    | 99719                | 154       | 487       | 1156      | 1073       | 3.16                  | 7.52                  | 6.98                   | 0.05                    |
| 1448632_at                 | Psmb10      | proteasome (prosome, macropain) subunit, beta type 10                          | 19171                | 334       | 1109      | 663       | 2291       | 3.32                  | 1.98                  | 6.85                   | 0.004                   |
| 1437932_a_at               | Cldn1       | claudin 1                                                                      | 12737                | 41        | 42        | 100       | 269        | 1.03                  | 2.43                  | 6.56                   | 0.04                    |
| 1426063_a_at               | Gem         | GTP binding protein (gene overexpressed in skeletal muscle)                    | 14579                | 60        | 117       | 124       | 385        | 1.94                  | 2.05                  | 6.37                   | 0.01                    |
| 1451564_at                 | Parp14      | poly (ADP-ribose) polymerase family, member 14                                 | 547253               | 164       | 459       | 345       | 1012       | 2.79                  | 2.10                  | 6.16                   | 0.005                   |
| 1450424_a_at               | Il18bp      | interleukin 18 binding protein                                                 | 16068                | 59        | 298       | 106       | 352        | 5.07                  | 1.81                  | 5.99                   | 0.01                    |
| 1438676_at                 | Mpa2l       | macrophage activation 2 like                                                   | 100702               | 64        | 249       | 96        | 379        | 3.90                  | 1.51                  | 5.94                   | 0.008                   |
| 1448162_at                 | Vcam1       | vascular cell adhesion molecule 1                                              | 22329                | 1841      | 7170      | 4474      | 1062       | 3.89                  | 2.43                  | 5.77                   | 0.002                   |
| 1438855_x_at               | Tnfaip2     | tumor necrosis factor, alpha-induced protein 2                                 | 21928                | 141       | 610       | 271       | 799        | 4.32                  | 1.92                  | 5.66                   | 0.05                    |
| 1428942_at                 | Mt2         | metallothionein 2                                                              | 17750                | 1717      | 7241      | 4059      | 9659       | 4.22                  | 2.36                  | 5.63                   | 0.005                   |
| 1419043_a_at               | Iigp1       | interferon inducible GTPase 1                                                  | 60440                | 483       | 1569      | 702       | 2624       | 3.25                  | 1.45                  | 5.44                   | 0.01                    |
| 1424921_at                 | Brd4        | bromodomain containing 4                                                       | 57261                | 755       | 3507      | 987       | 3990       | 4.65                  | 1.31                  | 5.29                   | 0.003                   |
| 1449204_at                 | Gjb5        | gap junction membrane channel protein beta 5                                   | 14622                | 51        | 135       | 160       | 264        | 2.66                  | 3.15                  | 5.20                   | 0.02                    |
| 1416295_a_at               | Il2rg       | interleukin 2 receptor, gamma chain                                            | 16186                | 90        | 254       | 259       | 455        | 2.81                  | 2.87                  | 5.04                   | 0.02                    |
| 1436659_at                 | Dclk1       | doublecortin-like kinase 1                                                     | 13175                | 1345      | 4106      | 6778      | 6781       | 3.05                  | 5.04                  | 5.04                   | 0.05                    |
| 1421392_a_at               | Birc3       | baculoviral IAP repeat-containing 3                                            | 11796                | 417       | 869       | 923       | 2071       | 2.08                  | 2.21                  | 4.96                   | 0.004                   |
| 1419132_at                 | Tlr2        | toll-like receptor 2                                                           | 24088                | 373       | 1305      | 790       | 1825       | 3.50                  | 2.12                  | 4.89                   | 0.003                   |
| 1425336_x_at               | H2-K1       | histocompatibility 2, K1, K region                                             | 14972                | 2371      | 9605      | 4787      | 1155       | 4.05                  | 2.02                  | 4.87                   | 0.0008                  |

| Affymetrix Probe set ID | Gene symbol | Gene name                                                           | Entrez Gene ID | Mean C | Mean T | Mean L | Mean TL | Fold change T/C | Fold change L/C | Fold change TL/C | p Value of T-test |
|-------------------------|-------------|---------------------------------------------------------------------|----------------|--------|--------|--------|---------|-----------------|-----------------|------------------|-------------------|
| 1417856_at              | Relb        | avian reticuloendotheliosis viral (v-rel) oncogene related B        | 19698          | 179    | 601    | 367    | 847     | 3.35            | 2.05            | 4.73             | 0.005             |
| 1449591_at              | Casp4       | caspase 4, apoptosis-related cysteine peptidase                     | 12363          | 269    | 1074   | 780    | 1271    | 4.00            | 2.91            | 4.73             | 0.0006            |
| 1433699_at              | Tnfaip3     | tumor necrosis factor, alpha-induced protein 3                      | 21929          | 489    | 1330   | 1090   | 2311    | 2.72            | 2.23            | 4.72             | 0.007             |
| 1451821_a_at            | Sp100       | nuclear antigen Sp100                                               | 20684          | 66     | 186    | 81     | 307     | 2.83            | 1.23            | 4.66             | 0.009             |
| 1434380_at              | Gbp6        | guanylate binding protein 6                                         | 229900         | 265    | 677    | 333    | 1229    | 2.55            | 1.26            | 4.64             | 0.01              |
| 1450034_at              | Stat1       | signal transducer and activator of transcription 1                  | 20846          | 946    | 2819   | 1566   | 4274    | 2.98            | 1.66            | 4.52             | 0.005             |
| 1417244_a_at            | Irf7        | interferon regulatory factor 7                                      | 54123          | 286    | 865    | 384    | 1283    | 3.03            | 1.35            | 4.49             | 0.007             |
| 1449025_at              | Ifit3       | interferon-induced protein with tetratricopeptide repeats 3         | 15959          | 1358   | 3864   | 1711   | 6053    | 2.84            | 1.26            | 4.46             | 0.01              |
| 1417292_at              | Ifi47       | interferon gamma inducible protein 47                               | 15953          | 871    | 2393   | 1567   | 3886    | 2.75            | 1.80            | 4.46             | 0.004             |
| 1439831_at              | EG240327    | predicted gene, EG240327                                            | 240327         | 84     | 204    | 119    | 370     | 2.42            | 1.41            | 4.41             | 0.01              |
| 1417793_at              | Iigp2       | interferon inducible GTPase 2                                       | 54396          | 423    | 1103   | 632    | 1864    | 2.61            | 1.49            | 4.40             | 0.007             |
| 1451784_x_at            | H2-D1       | histocompatibility 2, D region locus 1                              | 14964          | 1874   | 6157   | 2927   | 8183    | 3.29            | 1.56            | 4.37             | 0.002             |
| 1448775_at              | Ifi203      | interferon activated gene 203                                       | 15950          | 67     | 179    | 121    | 291     | 2.67            | 1.81            | 4.34             | 0.03              |
| 1424518_at              | BC020489    | cDNA sequence BC020489                                              | 223672         | 130    | 443    | 160    | 563     | 3.41            | 1.23            | 4.33             | 0.03              |
| 1452349_x_at            | Ifi205      | interferon activated gene 205                                       | 226695         | 651    | 1826   | 971    | 2806    | 2.81            | 1.49            | 4.31             | 0.01              |
| 1417314_at              | Cfb         | complement factor B                                                 | 14962          | 132    | 424    | 134    | 565     | 3.20            | 1.01            | 4.27             | 0.02              |
| 1415803_at              | Cx3cl1      | chemokine (C-X3-C motif) ligand 1                                   | 20312          | 621    | 1128   | 1461   | 2593    | 1.82            | 2.35            | 4.18             | 0.01              |
| 1425545_x_at            | H2-L        | histocompatibility 2, D region                                      | 14980          | 2172   | 6795   | 3180   | 8778    | 3.13            | 1.46            | 4.04             | 0.003             |
| 1449556_at              | H2-T23      | histocompatibility 2, T region locus 23                             | 15040          | 1254   | 3683   | 1665   | 5016    | 2.94            | 1.33            | 4.00             | 0.004             |
| 1418191_at              | Usp18       | ubiquitin specific peptidase 18                                     | 24110          | 458    | 1240   | 548    | 1800    | 2.71            | 1.20            | 3.93             | 0.03              |
| 1417936_at              | Ccl9        | chemokine (C-C motif) ligand 9                                      | 20308          | 866    | 1164   | 1914   | 3403    | 1.34            | 2.21            | 3.93             | 0.005             |
| 1450165_at              | Slfn2       | schlafen 2                                                          | 20556          | 116    | 193    | 134    | 453     | 1.67            | 1.16            | 3.92             | 0.01              |
| 1450484_a_at            | Tyki        | thymidylate kinase family LPS-inducible member                      | 22169          | 88     | 165    | 114    | 342     | 1.88            | 1.30            | 3.90             | 0.03              |
| 1453228_at              | Stx11       | syntaxin 11                                                         | 74732          | 362    | 586    | 693    | 1409    | 1.62            | 1.92            | 3.89             | 0.003             |
| 1434015_at              | Slc2a6      | solute carrier family 2 (facilitated glucose transporter), member 6 | 227659         | 64     | 207    | 136    | 249     | 3.24            | 2.12            | 3.89             | 0.01              |
| 1417853_at              | Clca1       | chloride channel calcium activated 1                                | 12722          | 142    | 298    | 367    | 541     | 2.11            | 2.59            | 3.82             | 0.01              |



| Affymetrix Probe set ID | Gene symbol | Gene name                                        | Entrez Gene ID | Mean C | Mean T | Mean L | Mean TL | Fold change T/C | Fold change L/C | Fold change TL/C | p Value of T-test |
|-------------------------|-------------|--------------------------------------------------|----------------|--------|--------|--------|---------|-----------------|-----------------|------------------|-------------------|
| 1429159_at              | Ith5        | inter-alpha (globulin) inhibitor H5              | 209378         | 78     | 119    | 93     | 285     | 1.53            | 1.19            | 3.66             | 0.02              |
| 1426276_at              | Ifih1       | interferon induced with helicase C domain 1      | 71586          | 629    | 1582   | 876    | 2178    | 2.52            | 1.39            | 3.47             | 0.01              |
| 1417130_s_at            | Angptl4     | angiopoietin-like 4                              | 57875          | 404    | 1039   | 935    | 1402    | 2.57            | 2.32            | 3.47             | 0.02              |
| 1422573_at              | Ampd3       | AMP deaminase 3                                  | 11717          | 299    | 624    | 511    | 1035    | 2.09            | 1.71            | 3.47             | 0.01              |
| 1435396_at              | Stxbp6      | syntaxin binding protein 6 (amisyn)              | 217517         | 145    | 208    | 230    | 500     | 1.44            | 1.59            | 3.45             | 0.01              |
| 1449133_at              | Sprr1a      | small proline-rich protein 1A                    | 20753          | 227    | 348    | 408    | 780     | 1.53            | 1.79            | 3.43             | 0.04              |
| 1417961_a_at            | Trim30      | tripartite motif protein 30                      | 20128          | 507    | 1271   | 548    | 1691    | 2.51            | 1.08            | 3.34             | 0.02              |
| 1443698_at              | Fbxo39      | F-box protein 39                                 | 327959         | 796    | 1926   | 1036   | 2663    | 2.42            | 1.30            | 3.34             | 0.02              |
| 1436562_at              | Ddx58       | DEAD (Asp-Glu-Ala-Asp) box polypeptide 58        | 230073         | 1245   | 2520   | 2170   | 4150    | 2.02            | 1.74            | 3.33             | 0.004             |
| 1422557_s_at            | Mt1         | metallothionein 1                                | 17748          | 2025   | 4960   | 3511   | 6722    | 2.45            | 1.73            | 3.32             | 0.004             |
| 1417141_at              | Igtp        | interferon gamma induced GTPase                  | 16145          | 347    | 847    | 581    | 1144    | 2.44            | 1.67            | 3.30             | 0.008             |
| 1438868_at              | Phf11       | PHD finger protein 11                            | 219131         | 902    | 2203   | 1192   | 2948    | 2.44            | 1.32            | 3.27             | 0.01              |
| 1454974_at              | Ntn1        | netrin 1                                         | 18208          | 254    | 572    | 433    | 828     | 2.25            | 1.71            | 3.26             | 0.01              |
| 1448859_at              | Cxcl13      | chemokine (C-X-C motif) ligand 13                | 55985          | 156    | 245    | 189    | 507     | 1.57            | 1.21            | 3.25             | 0.02              |
| 1420499_at              | Gch1        | GTP cyclohydrolase 1                             | 14528          | 175    | 554    | 224    | 563     | 3.16            | 1.28            | 3.21             | 0.02              |
| 1416897_at              | Parp9       | poly (ADP-ribose) polymerase family, member 9    | 80285          | 620    | 1398   | 869    | 1983    | 2.25            | 1.40            | 3.20             | 0.008             |
| 1442819_at              | Rhbdl2      | rhomboid, veinlet-like 2 (Drosophila)            | 230726         | 159    | 328    | 392    | 501     | 2.06            | 2.46            | 3.15             | 0.0009            |
| 1423909_at              | Tmem176a    | transmembrane protein 176A                       | 66058          | 1153   | 2874   | 2613   | 3590    | 2.49            | 2.27            | 3.11             | 0.03              |
| 1415899_at              | Junb        | Jun-B oncogene                                   | 16477          | 340    | 743    | 680    | 1038    | 2.19            | 2.00            | 3.06             | 0.001             |
| 1421812_at              | Tapbp       | TAP binding protein                              | 21356          | 2751   | 6688   | 3917   | 8239    | 2.43            | 1.42            | 2.99             | 0.003             |
| 1455500_at              | Rnf213      | ring finger protein 213                          | 629974         | 1013   | 1795   | 1276   | 3032    | 1.77            | 1.26            | 2.99             | 0.02              |
| 1436778_at              | Cybb        | cytochrome b-245, beta polypeptide               | 13058          | 115    | 246    | 131    | 341     | 2.14            | 1.14            | 2.97             | 0.01              |
| 1435208_at              | Dtx3l       | deltex 3-like (Drosophila)                       | 209200         | 577    | 1223   | 860    | 1699    | 2.12            | 1.49            | 2.94             | 0.007             |
| 1456494_a_at            | AI451617    | expressed sequence AI451617                      | 209387         | 245    | 528    | 293    | 720     | 2.15            | 1.19            | 2.94             | 0.03              |
| 1417172_at              | Ube2l6      | ubiquitin-conjugating enzyme E2L 6               | 56791          | 129    | 347    | 183    | 377     | 2.68            | 1.41            | 2.91             | 0.02              |
| 1438498_at              | Zmynd15     | zinc finger, MYND-type containing 15             | 574428         | 63     | 137    | 99     | 183     | 2.16            | 1.57            | 2.90             | 0.05              |
| 1429310_at              | Flrt3       | fibronectin leucine rich transmembrane protein 3 | 71436          | 119    | 150    | 240    | 342     | 1.26            | 2.02            | 2.87             | 0.03              |
| 1436838_x_at            | Cotl1       | coactosin-like 1 (Dictyostelium)                 | 72042          | 129    | 202    | 292    | 370     | 1.57            | 2.27            | 2.87             | 0.01              |
| 1443858_at              |             |                                                  | 552905         | 581    | 1256   | 709    | 1670    | 2.16            | 1.22            | 2.87             | 0.007             |
| 1418854_at              | Birc2       | baculoviral IAP repeat-containing 2              | 11797          | 1009   | 1519   | 2010   | 2825    | 1.51            | 1.99            | 2.80             | 0.008             |
| 1425719_a_at            | Nmi         | N-myc (and STAT) interactor                      | 64685          | 282    | 549    | 390    | 788     | 1.94            | 1.38            | 2.79             | 0.007             |

| Affymetrix Probe set ID | Gene symbol | Gene name                                                                                             | Entrez Gene ID | Mean C | Mean T | Mean L | Mean TL | Fold change T/C | Fold change L/C | Fold change TL/C | p Value of T-test |
|-------------------------|-------------|-------------------------------------------------------------------------------------------------------|----------------|--------|--------|--------|---------|-----------------|-----------------|------------------|-------------------|
| 1448380_at              | Lgals3bp    | lectin, galactoside-binding, soluble, 3 binding protein                                               | 19039          | 2304   | 5060   | 2725   | 6328    | 2.20            | 1.18            | 2.75             | 0.009             |
| 1440169_x_at            | Ifnar2      | interferon (alpha and beta) receptor 2                                                                | 15976          | 375    | 779    | 595    | 1031    | 2.08            | 1.59            | 2.75             | 0.01              |
| 1417300_at              | Smpd13b     | sphingomyelin phosphodiesterase, acid-like 3B                                                         | 100340         | 148    | 274    | 175    | 402     | 1.85            | 1.19            | 2.72             | 0.004             |
| 1425519_a_at            | Cd74        | CD74 antigen (invariant polypeptide of major histocompatibility complex, class II antigen-associated) | 16149          | 129    | 259    | 152    | 350     | 2.01            | 1.18            | 2.72             | 0.01              |
| 1426774_at              | Parp12      | poly (ADP-ribose) polymerase family, member 12                                                        | 243771         | 800    | 1520   | 1082   | 2156    | 1.90            | 1.35            | 2.70             | 0.005             |
| 1427165_at              | Il13ra1     | interleukin 13 receptor, alpha 1                                                                      | 16164          | 204    | 383    | 301    | 550     | 1.87            | 1.47            | 2.69             | 0.003             |
| 1450403_at              | Stat2       | signal transducer and activator of transcription 2                                                    | 20847          | 383    | 746    | 494    | 1024    | 1.95            | 1.29            | 2.67             | 0.007             |
| 1429184_at              | Gvin1       | GTPase, very large interferon inducible 1                                                             | 74558          | 1572   | 3330   | 1836   | 4146    | 2.12            | 1.17            | 2.64             | 0.01              |
| 1434322_at              | Micall2     | MICAL-like 2                                                                                          | 231830         | 161    | 319    | 344    | 422     | 1.98            | 2.13            | 2.62             | 0.03              |
| 1433930_at              | Hpse        | heparanase                                                                                            | 15442          | 173    | 295    | 286    | 453     | 1.71            | 1.66            | 2.62             | 0.01              |
| 1424857_a_at            | Trim34      | tripartite motif protein 34                                                                           | 94094          | 429    | 850    | 538    | 1119    | 1.98            | 1.26            | 2.61             | 0.02              |
| 1424148_a_at            | AW049765    | expressed sequence AW049765                                                                           | 106766         | 132    | 335    | 224    | 342     | 2.53            | 1.69            | 2.59             | 0.02              |
| 1452178_at              | Plec1       | plectin 1                                                                                             | 18810          | 230    | 476    | 288    | 589     | 2.07            | 1.25            | 2.56             | 0.005             |
| 1420088_at              | Nfkbia      | nuclear factor of kappa light chain gene enhancer in B-cells inhibitor, alpha                         | 18035          | 6521   | 1386   | 1347   | 1628    | 2.13            | 2.07            | 2.50             | 0.002             |
| 1429570_at              | Mlkl        | mixed lineage kinase domain-like                                                                      | 74568          | 354    | 627    | 452    | 873     | 1.77            | 1.28            | 2.46             | 0.03              |
| 1426278_at              | Ifi27       | interferon, alpha-inducible protein 27                                                                | 76933          | 330    | 688    | 336    | 813     | 2.08            | 1.02            | 2.46             | 0.02              |
| 1450672_a_at            | Trex1       | three prime repair exonuclease 1                                                                      | 22040          | 288    | 454    | 430    | 702     | 1.58            | 1.49            | 2.44             | 0.01              |
| 1417470_at              | Apobec3     | apolipoprotein B editing complex 3                                                                    | 80287          | 175    | 282    | 259    | 427     | 1.61            | 1.48            | 2.44             | 0.008             |
| 1416016_at              | Tap1        | transporter 1, ATP-binding cassette, sub-family B (MDR/TAP)                                           | 21354          | 446    | 715    | 588    | 1074    | 1.61            | 1.32            | 2.41             | 0.005             |
| 1448940_at              | Trim21      | tripartite motif protein 21                                                                           | 20821          | 456    | 819    | 617    | 1096    | 1.79            | 1.35            | 2.40             | 0.008             |
| 1460603_at              | Samd9l      | sterile alpha motif domain containing 9-like                                                          | 209086         | 1750   | 3161   | 2401   | 4144    | 1.81            | 1.37            | 2.37             | 0.007             |
| 1453913_a_at            | Tap2        | transporter 2, ATP-binding cassette, sub-family B (MDR/TAP)                                           | 21355          | 424    | 673    | 582    | 1000    | 1.59            | 1.37            | 2.36             | 0.007             |
| 1426501_a_at            | T2bp        | Traf2 binding protein                                                                                 | 211550         | 156    | 277    | 291    | 360     | 1.78            | 1.87            | 2.31             | 0.005             |
| 1441855_x_at            | Cxcl1       | chemokine (C-X-C motif) ligand 1                                                                      | 14825          | 1015   | 1759   | 1305   | 2341    | 1.73            | 1.29            | 2.31             | 0.009             |

| Affymetrix Probe set ID | Gene symbol | Gene name                                                      | Entrez Gene ID | Mean C | Mean T | Mean L | Mean TL | Fold change T/C | Fold change L/C | Fold change TL/C | p Value of T-test |
|-------------------------|-------------|----------------------------------------------------------------|----------------|--------|--------|--------|---------|-----------------|-----------------|------------------|-------------------|
| 1428384_at              | D4Bwg0951e  | DNA segment, Chr 4, Brigham & Women's Genetics 0951 expressed  | 52829          | 2224   | 3310   | 4469   | 5124    | 1.49            | 2.01            | 2.30             | 0.04              |
| 1455724_at              |             |                                                                |                | 348    | 573    | 666    | 797     | 1.64            | 1.91            | 2.29             | 0.002             |
| 1418099_at              | Tnfrsf1b    | tumor necrosis factor receptor superfamily, member 1b          | 21938          | 240    | 307    | 361    | 547     | 1.28            | 1.51            | 2.28             | 0.02              |
| 1422782_s_at            | Tlr3        | toll-like receptor 3                                           | 142980         | 425    | 769    | 568    | 970     | 1.81            | 1.34            | 2.28             | 0.003             |
| 1451544_at              | Tapbpl      | TAP binding protein-like                                       | 213233         | 218    | 325    | 287    | 496     | 1.49            | 1.32            | 2.28             | 0.004             |
| 1427739_a_at            | Trp53       | transformation related protein 53                              | 22059          | 660    | 1086   | 1246   | 1499    | 1.64            | 1.89            | 2.27             | 0.002             |
| 1438561_x_at            | Tmem180     | transmembrane protein 180                                      | 75146          | 121    | 273    | 243    | 274     | 2.26            | 2.01            | 2.27             | 0.04              |
| 1455292_x_at            | Rsl1        | regulator of sex limited protein 1                             | 380855         | 206    | 370    | 368    | 467     | 1.80            | 1.79            | 2.27             | 0.02              |
| 1426511_at              | Susd2       | sushi domain containing 2                                      | 71733          | 231    | 331    | 274    | 519     | 1.43            | 1.19            | 2.25             | 0.007             |
| 1427689_a_at            | Tnip1       | TNFAIP3 interacting protein 1                                  | 57783          | 1491   | 2342   | 2027   | 3343    | 1.57            | 1.36            | 2.24             | 0.002             |
| 1417719_at              | Sap30       | sin3 associated polypeptide                                    | 60406          | 228    | 352    | 333    | 513     | 1.54            | 1.46            | 2.24             | 0.008             |
| 1437226_x_at            | Marcks11    | MARCKS-like 1                                                  | 17357          | 718    | 888    | 1124   | 1599    | 1.24            | 1.56            | 2.23             | 0.04              |
| 1422742_at              | Hivep1      | human immunodeficiency virus type I enhancer binding protein 1 | 110521         | 399    | 620    | 642    | 888     | 1.55            | 1.61            | 2.22             | 0.003             |
| 1421217_a_at            | Lgals9      | lectin, galactose binding, soluble 9                           | 16859          | 2063   | 3331   | 2545   | 4549    | 1.61            | 1.23            | 2.21             | 0.02              |
| 1421358_at              | H2-M3       | histocompatibility 2, M region locus 3                         | 14991          | 440    | 771    | 582    | 971     | 1.75            | 1.32            | 2.21             | 0.002             |
| 1448436_a_at            | Irf1        | interferon regulatory factor 1                                 | 16362          | 806    | 1295   | 1220   | 1777    | 1.61            | 1.51            | 2.20             | 0.002             |
| 1440831_at              | Bach1       | BTB and CNC homology 1                                         | 12013          | 921    | 1210   | 1391   | 2025    | 1.31            | 1.51            | 2.20             | 0.007             |
| 1421008_at              | Rsad2       | radical S-adenosyl methionine domain containing 2              | 58185          | 121    | 174    | 152    | 264     | 1.44            | 1.26            | 2.19             | 0.04              |
| 1452483_a_at            | Cd44        | CD44 antigen                                                   | 12505          | 841    | 1216   | 1320   | 1845    | 1.45            | 1.57            | 2.19             | 0.04              |
| 1448167_at              | Ifngr1      | interferon gamma receptor 1                                    | 15979          | 1036   | 1513   | 1841   | 2261    | 1.46            | 1.78            | 2.18             | 0.009             |
| 1460444_at              | Arrb1       | arrestin, beta 1                                               | 109689         | 172    | 212    | 259    | 372     | 1.24            | 1.51            | 2.17             | 0.02              |
| 1456586_x_at            | Mvp         | major vault protein                                            | 78388          | 731    | 1307   | 1146   | 1582    | 1.79            | 1.57            | 2.16             | 0.004             |
| 1437303_at              | Il6st       | interleukin 6 signal transducer                                | 16195          | 490    | 1082   | 621    | 1055    | 2.21            | 1.27            | 2.15             | 0.01              |
| 1421928_at              | Epha4       | Eph receptor A4                                                | 13838          | 211    | 338    | 376    | 452     | 1.60            | 1.78            | 2.15             | 0.05              |
| 1450387_s_at            | Ak311       | adenylate kinase 3 alpha-like 1                                | 11639          | 760    | 1344   | 1020   | 1631    | 1.77            | 1.34            | 2.15             | 0.01              |
| 1449875_s_at            | H2-T10      | histocompatibility 2, T region locus 10                        | 15024          | 1735   | 2878   | 1932   | 3688    | 1.66            | 1.11            | 2.13             | 0.009             |
| 1418825_at              | Irgm        | immunity-related GTPase family, M                              | 15944          | 2177   | 4176   | 2663   | 4619    | 1.92            | 1.22            | 2.12             | 0.03              |
| 1417346_at              | Pycard      | PYD and CARD domain containing                                 | 66824          | 183    | 234    | 250    | 387     | 1.28            | 1.37            | 2.11             | 0.03              |
| 1417189_at              | Psme2       | proteasome (prosome, macropain) 28 subunit, beta               | 19188          | 2076   | 3611   | 2568   | 4384    | 1.74            | 1.24            | 2.11             | 0.003             |

| Affymetrix Probe set ID | Gene symbol | Gene name                                                               | Entrez Gene ID | Mean C | Mean T | Mean L | Mean TL | Fold change T/C | Fold change L/C | Fold change TL/C | p Value of T-test |
|-------------------------|-------------|-------------------------------------------------------------------------|----------------|--------|--------|--------|---------|-----------------|-----------------|------------------|-------------------|
| 1418403_at              | Adam19      | a disintegrin and metallopeptidase domain 19 (meltrin beta)             | 11492          | 116    | 175    | 184    | 245     | 1.51            | 1.59            | 2.11             | 0.03              |
| 1418004_a_at            | Tmem176b    | transmembrane protein 176B                                              | 65963          | 3116   | 5364   | 5248   | 6534    | 1.72            | 1.68            | 2.10             | 0.02              |
| 1445897_s_at            | Ifi35       | interferon-induced protein 35                                           | 70110          | 2919   | 5011   | 3451   | 6124    | 1.72            | 1.18            | 2.10             | 0.007             |
| 1448914_a_at            | Csfl        | colony stimulating factor 1 (macrophage)                                | 12977          | 3862   | 5953   | 5180   | 8053    | 1.54            | 1.34            | 2.09             | 0.01              |
| 1418587_at              | Traf3       | Tnf receptor-associated factor 3                                        | 22031          | 1203   | 2026   | 2211   | 2504    | 1.68            | 1.84            | 2.08             | 0.0008            |
| 1422528_a_at            | Zfp3611     | zinc finger protein 36, C3H type-like 1                                 | 12192          | 571    | 609    | 1036   | 1181    | 1.07            | 1.82            | 2.07             | 0.01              |
| 1420913_at              | Slco2a1     | solute carrier organic anion transporter family, member 2a1             | 24059          | 1486   | 2355   | 2018   | 3070    | 1.58            | 1.36            | 2.07             | 0.002             |
| 1417822_at              | D17H6S56E-5 | DNA segment, Chr 17, human D6S56E 5                                     | 110956         | 1031   | 1312   | 1432   | 2126    | 1.27            | 1.39            | 2.06             | 0.004             |
| 1425394_at              | BC023105    | cDNA sequence BC023105                                                  | 207269         | 107    | 142    | 95     | 220     | 1.33            | 0.89            | 2.06             | 0.02              |
| 1428660_s_at            | Tor3a       | torsin family 3, member A                                               | 30935          | 507    | 787    | 596    | 1039    | 1.55            | 1.18            | 2.05             | 0.007             |
| 1422754_at              | Tmod1       | tropomodulin 1                                                          | 21916          | 173    | 315    | 267    | 355     | 1.82            | 1.54            | 2.05             | 0.007             |
| 1431095_a_at            | Herc5       | hect domain and RLD 5                                                   | 67138          | 374    | 548    | 395    | 762     | 1.47            | 1.06            | 2.04             | 0.02              |
| 1421236_at              | Ripk2       | receptor (TNFRSF)-interacting serine-threonine kinase 2                 | 192656         | 384    | 634    | 508    | 780     | 1.65            | 1.32            | 2.03             | 0.05              |
| 1416942_at              | Arts1       | type 1 tumor necrosis factor receptor shedding aminopeptidase regulator | 80898          | 443    | 693    | 423    | 897     | 1.57            | 0.95            | 2.03             | 0.005             |
| 1419155_a_at            | Sox4        | SRY-box containing gene 4                                               | 20677          | 1019   | 1425   | 1967   | 2057    | 1.40            | 1.93            | 2.02             | 0.008             |
| 1423557_at              | Ifngr2      | interferon gamma receptor 2                                             | 15980          | 1091   | 1797   | 1816   | 2198    | 1.65            | 1.66            | 2.02             | 0.01              |
| 1427091_at              | Znfx1       | zinc finger, NFX1-type containing 1                                     | 98999          | 367    | 593    | 463    | 740     | 1.61            | 1.26            | 2.01             | 0.005             |
| 1432478_a_at            | Ibrdc3      | IBR domain containing 3                                                 | 75234          | 202    | 210    | 284    | 404     | 1.04            | 1.40            | 2.00             | 0.02              |

**Table SIII. Differential induction of TNF,  $\alpha$ -LT $\beta$ R and TNF +  $\alpha$ -LT $\beta$ R-induced mRNAs at 24 h reveals distinctive and synergistic induction of TNFR1 and LT $\beta$ R-induced mRNAs as described in Heatmaps of Fig. 2.** Gene symbols and gene names are indicated for ease of reading. **(a1)** TNF effect >  $\alpha$ -LT $\beta$ R effect with no hyperinduction as defined below; **(a2)**  $\alpha$ -LT $\beta$ R effect > TNF effect with no hyperinduction; **(a3)** TNF plus  $\alpha$ -LT $\beta$ R hyperinduction. Synergistic hyperinduction is defined by two conditions: (1) (TNF +  $\alpha$ -LT $\beta$ R) effect  $\geq 1.5$ {*Factor of Synergy*} x (TNF effect +  $\alpha$ -LT $\beta$ R effect); (2) Two-sided, paired T-test of (TNF +  $\alpha$ -LT $\beta$ R) effect against (TNF effect +  $\alpha$ -LT $\beta$ R effect),  $P \leq 0.05$  (p value of synergy); **(b1)** TNF effect >  $\alpha$ -LT $\beta$ R effect (Top20); **(b2)**  $\alpha$ -LT $\beta$ R effect > TNF effect (Top20); **(b3)** TNF plus  $\alpha$ -LT $\beta$ R hyperinduction (Top20).**(c)** Interferon signature; **(d1)** Immune response (GO:0006955); **(d2)** Regulation of immune response (GO:0050776); **(d3)** Inflammatory response (GO:0006954); **(d4)** Chemotaxis (GO:0006935); **(d5)** Regulation of developmental process (GO:0050793); **(d6)** Immune system development (GO:0002520); **(d7)** Chemokine activity (GO:0008009); **(d8)** Cell adhesion (GO:0007155); **(d9)** Transcription factor activity (GO:0003700); **(d10)** Antigen processing and presentation (GO:0019882); **(d11)** Cytokine binding (GO:0019955); **(e)** Down-regulated genes.

**Table SIII.a1. TNF effect >  $\alpha$ -LT $\beta$ R effect.**

| Affymetrix Probe set ID | Gene symbol    | Gene name                                | Entrez Gene ID | Mean C | Mean T | Mean L | Mean TL | Fold change T/C | Fold change L/C | Fold change TL/C | Fold change T/L | p Value of ANOVA |
|-------------------------|----------------|------------------------------------------|----------------|--------|--------|--------|---------|-----------------|-----------------|------------------|-----------------|------------------|
| 1448881_at              | Hp             | haptoglobin                              | 15439          | 85     | 1148   | 130    | 1212    | 13.56           | 1.53            | 14.32            | 8.85            | 0.003            |
| 1450826_a_at            | Saa3           | serum amyloid A 3                        | 20210          | 95     | 867    | 101    | 1015    | 9.11            | 1.06            | 10.66            | 8.62            | 0.008            |
| 1447927_at              | Mpa2l          | macrophage activation 2 like             | 100702         | 11     | 387    | 63     | 798     | 36.65           | 5.95            | 75.60            | 6.16            | 0.004            |
| 1427746_x_at            | H2-K1          | histocompatibility 2, K1, K region       | 14972          | 484    | 7251   | 1624   | 9607    | 14.99           | 3.36            | 19.86            | 4.47            | <0.0001          |
| 1436003_at              | Vcam1          | vascular cell adhesion molecule 1        | 22329          | 103    | 1996   | 453    | 2899    | 19.47           | 4.41            | 28.28            | 4.41            | 0.0002           |
| 1427747_a_at            | Lcn2           | lipocalin 2                              | 16819          | 334    | 3132   | 724    | 3515    | 9.39            | 2.17            | 10.54            | 4.33            | 0.02             |
| 1435906_x_at            | Gbp2           | guanylate nucleotide binding protein 2   | 14469          | 291    | 2526   | 660    | 4228    | 8.68            | 2.27            | 14.53            | 3.82            | 0.0002           |
| 1424921_at              | Brd4           | bromodomain containing 4                 | 57261          | 755    | 3507   | 987    | 3990    | 4.65            | 1.31            | 5.29             | 3.55            | 0.0002           |
| 1424948_x_at            | H2-K1          | histocompatibility 2, K1, K region       | 14972          | 417    | 2437   | 696    | 3628    | 5.84            | 1.67            | 8.70             | 3.50            | <0.0001          |
| 1453939_x_at            | LOC677168      | similar to ISG15 ubiquitin-like modifier | 677168         | 30     | 261    | 76     | 333     | 8.74            | 2.53            | 11.12            | 3.45            | 0.0005           |
| 1418240_at              | Gbp2           | guanylate nucleotide binding protein 2   | 14469          | 292    | 2362   | 690    | 3721    | 8.09            | 2.36            | 12.75            | 3.42            | <0.0001          |
| 1453238_s_at            | 1200016E24 Rik | RIKEN cDNA 1200016E24 gene               | 319202         | 322    | 1138   | 349    | 1230    | 3.54            | 1.08            | 3.82             | 3.27            | <0.0001          |
| 1417314_at              | Cfb            | complement factor B                      | 14962          | 132    | 424    | 134    | 565     | 3.20            | 1.01            | 4.27             | 3.17            | 0.01             |
| 1450424_a_at            | Il18bp         | interleukin 18 binding protein           | 16068          | 59     | 298    | 106    | 352     | 5.07            | 1.81            | 5.99             | 2.80            | 0.0009           |
| 1453196_a_at            | Oasl2          | 2'-5' oligoadenylate synthetase-like 2   | 23962          | 84     | 692    | 247    | 1463    | 8.25            | 2.95            | 17.45            | 2.80            | 0.0005           |
| 1424518_at              | BC020489       | cDNA sequence BC020489                   | 223672         | 130    | 443    | 160    | 563     | 3.41            | 1.23            | 4.33             | 2.76            | 0.02             |
| 1418580_at              | Rtp4           | receptor transporter protein 4           | 67775          | 724    | 3892   | 1431   | 5403    | 5.37            | 1.98            | 7.46             | 2.72            | 0.003            |

| Affymetrix Probe set ID | Gene symbol | Gene name                                | Entrez Gene ID | Mean C | Mean T | Mean L | Mean TL | Fold change T/C | Fold change L/C | Fold change TL/C | Fold change T/L | p Value of ANOVA |
|-------------------------|-------------|------------------------------------------|----------------|--------|--------|--------|---------|-----------------|-----------------|------------------|-----------------|------------------|
| 1431591_s_at            | LOC677168   | similar to ISG15 ubiquitin-like modifier | 677168         | 547    | 2194   | 809    | 3154    | 4.01            | 1.48            | 5.76             | 2.71            | 0.003            |
| 1453304_s_at            | Ly6e        | lymphocyte antigen 6 complex, locus E    | 17069          | 559    | 2775   | 1030   | 4701    | 4.96            | 1.84            | 8.40             | 2.70            | 0.0001           |
| 1451314_a_at            | Vcam1       | vascular cell adhesion molecule 1        | 22329          | 559    | 3670   | 1363   | 5081    | 6.56            | 2.44            | 9.08             | 2.69            | <0.0001          |
| 1431008_at              | 0610037M15  | RIKEN cDNA 0610037M15 gene               | 68395          | 77     | 395    | 153    | 624     | 5.14            | 1.99            | 8.10             | 2.58            | 0.001            |
| 1448550_at              | Lbp         | lipopolysaccharide binding protein       | 16803          | 142    | 482    | 188    | 468     | 3.39            | 1.33            | 3.30             | 2.56            | 0.03             |
| 1451426_at              | Dhx58       | DEXH (Asp-Glu-X-His) box polypeptide 58  | 80861          | 38     | 300    | 117    | 444     | 7.86            | 3.07            | 11.63            | 2.56            | 0.02             |
| 1451683_x_at            | H2-D1       | histocompatibility 2, D region locus 1   | 14964          | 943    | 3294   | 1290   | 4254    | 3.49            | 1.37            | 4.51             | 2.55            | 0.0001           |
| 1420499_at              | Gch1        | GTP cyclohydrolase 1                     | 14528          | 175    | 554    | 224    | 563     | 3.16            | 1.28            | 3.21             | 2.47            | 0.01             |
| 1417961_a_at            | Trim30      | tripartite motif protein 30              | 20128          | 507    | 1271   | 548    | 1691    | 2.51            | 1.08            | 3.34             | 2.32            | 0.01             |
| 1451821_a_at            | Sp100       | nuclear antigen Sp100                    | 20684          | 66     | 186    | 81     | 307     | 2.83            | 1.23            | 4.66             | 2.29            | 0.001            |
| 1417244_a_at            | Irf7        | interferon regulatory factor 7           | 54123          | 286    | 865    | 384    | 1283    | 3.03            | 1.35            | 4.49             | 2.25            | 0.004            |
| 1451860_a_at            | Trim30      | tripartite motif protein 30              | 20128          | 275    | 770    | 347    | 1097    | 2.80            | 1.26            | 3.99             | 2.22            | 0.003            |
| 1449556_at              | H2-T23      | histocompatibility 2, T region locus 23  | 15040          | 1254   | 3683   | 1665   | 5016    | 2.94            | 1.33            | 4.00             | 2.21            | 0.0002           |
| 1451931_x_at            | H2-L        | histocompatibility 2, D region           | 14980          | 1623   | 5204   | 2390   | 7010    | 3.21            | 1.47            | 4.32             | 2.18            | <0.0001          |
| 1426906_at              | Ifi205      | interferon activated gene 205            | 226695         | 120    | 482    | 223    | 748     | 4.02            | 1.86            | 6.23             | 2.16            | 0.004            |
| 1451655_at              | Slfn8       | schlafen 8                               | 276950         | 20     | 178    | 83     | 224     | 8.85            | 4.12            | 11.16            | 2.14            | 0.02             |
| 1425545_x_at            | H2-L        | histocompatibility 2, D region           | 14980          | 2172   | 6795   | 3180   | 8778    | 3.13            | 1.46            | 4.04             | 2.14            | <0.0001          |
| 1451784_x_at            | H2-D1       | histocompatibility 2, D region locus 1   | 14964          | 1874   | 6157   | 2927   | 8183    | 3.29            | 1.56            | 4.37             | 2.10            | <0.0001          |
| 1452231_x_at            | Ifi205      | interferon activated gene 205            | 226695         | 184    | 656    | 317    | 1090    | 3.57            | 1.73            | 5.94             | 2.07            | 0.002            |
| 1423954_at              | C3          | complement component 3                   | 12266          | 500    | 4353   | 2107   | 7194    | 8.70            | 4.21            | 14.38            | 2.07            | 0.02             |
| 1450534_x_at            | H2-D1       | histocompatibility 2, D region locus 1   | 14964          | 224    | 773    | 376    | 808     | 3.45            | 1.68            | 3.61             | 2.06            | 0.0004           |
| 1426278_at              | Ifi27       | interferon, alpha-inducible protein 27   | 76933          | 330    | 688    | 336    | 813     | 2.08            | 1.02            | 2.46             | 2.05            | 0.007            |
| 1429692_s_at            | Gch1        | GTP cyclohydrolase 1                     | 14528          | 177    | 423    | 209    | 416     | 2.38            | 1.18            | 2.35             | 2.03            | 0.008            |
| 1425336_x_at            | H2-K1       | histocompatibility 2, K1, K region       | 14972          | 2371   | 9605   | 4787   | 11557   | 4.05            | 2.02            | 4.87             | 2.01            | <0.0001          |
| 1417172_at              | Ube2l6      | ubiquitin-conjugating enzyme E2L 6       | 56791          | 129    | 347    | 183    | 377     | 2.68            | 1.41            | 2.91             | 1.90            | 0.01             |
| 1452349_x_at            | Ifi205      | interferon activated gene 205            | 226695         | 651    | 1826   | 971    | 2806    | 2.81            | 1.49            | 4.31             | 1.88            | 0.003            |
| 1436778_at              | Cybb        | cytochrome b-245, beta polypeptide       | 13058          | 115    | 246    | 131    | 341     | 2.14            | 1.14            | 2.97             | 1.88            | 0.004            |
| 1432026_a_at            | Herc5       | hect domain and RLD 5                    | 67138          | 108    | 226    | 120    | 345     | 2.10            | 1.12            | 3.20             | 1.88            | 0.003            |

| Affymetrix Probe set ID | Gene symbol    | Gene name                                                                                             | Entrez Gene ID | Mean C | Mean T | Mean L | Mean TL | Fold change T/C | Fold change L/C | Fold change TL/C | Fold change T/L | p Value of ANOVA |
|-------------------------|----------------|-------------------------------------------------------------------------------------------------------|----------------|--------|--------|--------|---------|-----------------|-----------------|------------------|-----------------|------------------|
| 1443698_at              | Fbxo39         | F-box protein 39                                                                                      | 327959         | 796    | 1926   | 1036   | 2663    | 2.42            | 1.30            | 3.34             | 1.86            | 0.01             |
| 1448380_at              | Lgals3bp       | lectin, galactoside-binding, soluble, 3 binding protein                                               | 19039          | 2304   | 5060   | 2725   | 6328    | 2.20            | 1.18            | 2.75             | 1.86            | 0.002            |
| 1438868_at              | Phf11          | PHD finger protein 11                                                                                 | 219131         | 902    | 2203   | 1192   | 2948    | 2.44            | 1.32            | 3.27             | 1.85            | 0.01             |
| 1420915_at              | Stat1          | signal transducer and activator of transcription 1                                                    | 20846          | 472    | 1320   | 718    | 1775    | 2.79            | 1.52            | 3.76             | 1.84            | 0.0008           |
| 1429184_at              | Gvin1          | GTPase, very large interferon inducible 1                                                             | 74558          | 1572   | 3330   | 1836   | 4146    | 2.12            | 1.17            | 2.64             | 1.81            | 0.003            |
| 1450033_a_at            | Stat1          | signal transducer and activator of transcription 1                                                    | 20846          | 588    | 1804   | 997    | 2544    | 3.07            | 1.70            | 4.33             | 1.81            | 0.001            |
| 1426276_at              | Ifih1          | interferon induced with helicase C domain 1                                                           | 71586          | 629    | 1582   | 876    | 2178    | 2.52            | 1.39            | 3.47             | 1.81            | 0.003            |
| 1456494_a_at            | AI451617       | expressed sequence AI451617                                                                           | 209387         | 245    | 528    | 293    | 720     | 2.15            | 1.19            | 2.94             | 1.80            | 0.02             |
| 1450034_at              | Stat1          | signal transducer and activator of transcription 1                                                    | 20846          | 946    | 2819   | 1566   | 4274    | 2.98            | 1.66            | 4.52             | 1.80            | 0.0009           |
| 1428942_at              | Mt2            | metallothionein 2                                                                                     | 17750          | 1717   | 7241   | 4059   | 9659    | 4.22            | 2.36            | 5.63             | 1.78            | 0.001            |
| 1443858_at              |                |                                                                                                       | 552905         | 581    | 1256   | 709    | 1670    | 2.16            | 1.22            | 2.87             | 1.77            | 0.001            |
| 1417793_at              | Iigp2          | interferon inducible GTPase 2                                                                         | 54396          | 423    | 1103   | 632    | 1864    | 2.61            | 1.49            | 4.40             | 1.74            | 0.0006           |
| 1437303_at              | Il6st          | interleukin 6 signal transducer                                                                       | 16195          | 490    | 1082   | 621    | 1055    | 2.21            | 1.27            | 2.15             | 1.74            | 0.002            |
| 1452348_s_at            | Ifi205         | interferon activated gene 205                                                                         | 226695         | 352    | 972    | 564    | 1545    | 2.76            | 1.60            | 4.38             | 1.72            | 0.004            |
| 1439068_at              | Arts1          | type 1 tumor necrosis factor receptor shedding aminopeptidase regulator                               | 80898          | 178    | 464    | 270    | 557     | 2.61            | 1.52            | 3.13             | 1.72            | 0.002            |
| 1421812_at              | Tapbp          | TAP binding protein                                                                                   | 21356          | 2751   | 6688   | 3917   | 8239    | 2.43            | 1.42            | 2.99             | 1.71            | <0.0001          |
| 1425519_a_at            | Cd74           | CD74 antigen (invariant polypeptide of major histocompatibility complex, class II antigen-associated) | 16149          | 129    | 259    | 152    | 350     | 2.01            | 1.18            | 2.72             | 1.70            | 0.002            |
| 1426324_at              | H2-D1          | histocompatibility 2, D region locus 1                                                                | 14964          | 97     | 494    | 291    | 694     | 5.11            | 3.01            | 7.18             | 1.70            | 0.003            |
| 1438027_at              | 5830443L24 Rik | RIKEN cDNA 5830443L24 gene                                                                            | 76074          | 14     | 71     | 42     | 201     | 5.14            | 3.03            | 14.48            | 1.69            | 0.003            |
| 1435137_s_at            | 1200016E24 Rik | RIKEN cDNA 1200016E24 gene                                                                            | 319202         | 346    | 720    | 433    | 939     | 2.08            | 1.25            | 2.71             | 1.66            | 0.0002           |
| 1452178_at              | Plec1          | plectin 1                                                                                             | 18810          | 230    | 476    | 288    | 589     | 2.07            | 1.25            | 2.56             | 1.65            | 0.0004           |
| 1419132_at              | Tlr2           | toll-like receptor 2                                                                                  | 24088          | 373    | 1305   | 790    | 1825    | 3.50            | 2.12            | 4.89             | 1.65            | <0.0001          |
| 1416942_at              | Arts1          | type 1 tumor necrosis factor receptor shedding aminopeptidase regulator                               | 80898          | 443    | 693    | 423    | 897     | 1.57            | 0.95            | 2.03             | 1.64            | <0.0001          |

| Affymetrix Probe set ID | Gene symbol | Gene name                                                                                | Entrez Gene ID | Mean C | Mean T | Mean L | Mean TL | Fold change T/C | Fold change L/C | Fold change TL/C | Fold change T/L | p Value of ANOVA |
|-------------------------|-------------|------------------------------------------------------------------------------------------|----------------|--------|--------|--------|---------|-----------------|-----------------|------------------|-----------------|------------------|
| 1417856_at              | Relb        | avian reticuloendotheliosis viral (v-rel) oncogene related B                             | 19698          | 179    | 601    | 367    | 847     | 3.35            | 2.05            | 4.73             | 1.64            | 0.0003           |
| 1438037_at              | Herc5       | hect domain and RLD 5                                                                    | 67138          | 264    | 591    | 364    | 855     | 2.24            | 1.38            | 3.25             | 1.62            | 0.006            |
| 1417851_at              | Cxcl13      | chemokine (C-X-C motif) ligand 13                                                        | 55985          | 50     | 109    | 67     | 324     | 2.17            | 1.34            | 6.45             | 1.62            | 0.001            |
| 1416897_at              | Parp9       | poly (ADP-ribose) polymerase family, member 9                                            | 80285          | 620    | 1398   | 869    | 1983    | 2.25            | 1.40            | 3.20             | 1.61            | 0.002            |
| 1448162_at              | Vcam1       | vascular cell adhesion molecule 1                                                        | 22329          | 1841   | 7170   | 4474   | 10628   | 3.89            | 2.43            | 5.77             | 1.60            | <0.0001          |
| 1436172_at              | Samd9l      | sterile alpha motif domain containing 9-like                                             | 209086         | 368    | 808    | 507    | 984     | 2.20            | 1.38            | 2.68             | 1.59            | 0.004            |
| 1424857_a_at            | Trim34      | tripartite motif protein 34                                                              | 94094          | 429    | 850    | 538    | 1119    | 1.98            | 1.26            | 2.61             | 1.58            | 0.01             |
| 1457644_s_at            | Cxcl1       | chemokine (C-X-C motif) ligand 1                                                         | 14825          | 292    | 794    | 504    | 1303    | 2.72            | 1.73            | 4.46             | 1.58            | 0.006            |
| 1418825_at              | Irgm        | immunity-related GTPase family, M                                                        | 15944          | 2177   | 4176   | 2663   | 4619    | 1.92            | 1.22            | 2.12             | 1.57            | 0.03             |
| 1450696_at              | Psmb9       | proteasome (prosome, macropain) subunit, beta type 9 (large multifunctional peptidase 2) | 16912          | 31     | 270    | 173    | 637     | 8.83            | 5.65            | 20.80            | 1.56            | 0.0003           |
| 1421911_at              | Stat2       | signal transducer and activator of transcription 2                                       | 20847          | 250    | 472    | 304    | 653     | 1.89            | 1.22            | 2.61             | 1.56            | 0.002            |
| 1415989_at              | Vcam1       | vascular cell adhesion molecule 1                                                        | 22329          | 838    | 3396   | 2185   | 6175    | 4.05            | 2.61            | 7.37             | 1.55            | <0.0001          |
| 1450378_at              | Tapbp       | TAP binding protein                                                                      | 21356          | 802    | 1871   | 1209   | 2627    | 2.33            | 1.51            | 3.27             | 1.55            | 0.0001           |
| 1417292_at              | Ifi47       | interferon gamma inducible protein 47                                                    | 15953          | 871    | 2393   | 1567   | 3886    | 2.75            | 1.80            | 4.46             | 1.53            | 0.0003           |
| 1434015_at              | Slc2a6      | solute carrier family 2 (facilitated glucose transporter), member 6                      | 227659         | 64     | 207    | 136    | 249     | 3.24            | 2.12            | 3.89             | 1.53            | 0.007            |
| 1450403_at              | Stat2       | signal transducer and activator of transcription 2                                       | 20847          | 383    | 746    | 494    | 1024    | 1.95            | 1.29            | 2.67             | 1.51            | 0.001            |
| 1425156_at              | Gbp6        | guanylate binding protein 6                                                              | 229900         | 59     | 166    | 110    | 203     | 2.84            | 1.88            | 3.46             | 1.51            | 0.003            |
| 1424148_a_at            | AW049765    | expressed sequence AW049765                                                              | 106766         | 132    | 335    | 224    | 342     | 2.53            | 1.69            | 2.59             | 1.50            | 0.009            |
| 1449875_s_at            | H2-T10      | histocompatibility 2, T region locus 10                                                  | 15024          | 1735   | 2878   | 1932   | 3688    | 1.66            | 1.11            | 2.13             | 1.49            | 0.001            |
| 1425394_at              | BC023105    | cDNA sequence BC023105                                                                   | 207269         | 107    | 142    | 95     | 220     | 1.33            | 0.89            | 2.06             | 1.48            | 0.03             |
| 1418133_at              | Bcl3        | B-cell leukemia/lymphoma 3                                                               | 12051          | 21     | 211    | 142    | 275     | 10.20           | 6.90            | 13.34            | 1.48            | 0.002            |
| 1448775_at              | Ifi203      | interferon activated gene 203                                                            | 15950          | 67     | 179    | 121    | 291     | 2.67            | 1.81            | 4.34             | 1.48            | 0.009            |
| 1417141_at              | Igtp        | interferon gamma induced GTPase                                                          | 16145          | 347    | 847    | 581    | 1144    | 2.44            | 1.67            | 3.30             | 1.46            | 0.003            |
| 1445897_s_at            | Ifi35       | interferon-induced protein 35                                                            | 70110          | 2919   | 5011   | 3451   | 6124    | 1.72            | 1.18            | 2.10             | 1.45            | 0.002            |
| 1450484_a_at            | Tyki        | thymidylate kinase family LPS-inducible member                                           | 22169          | 88     | 165    | 114    | 342     | 1.88            | 1.30            | 3.90             | 1.45            | 0.04             |



| Affymetrix Probe set ID | Gene symbol    | Gene name                                        | Entrez Gene ID | Mean C | Mean T | Mean L | Mean TL | Fold change T/C | Fold change L/C | Fold change TL/C | Fold change T/L | p Value of ANOVA |
|-------------------------|----------------|--------------------------------------------------|----------------|--------|--------|--------|---------|-----------------|-----------------|------------------|-----------------|------------------|
| 1450165_at              | Slfn2          | schlafen 2                                       | 20556          | 116    | 193    | 134    | 453     | 1.67            | 1.16            | 3.92             | 1.45            | 0.003            |
| 1435208_at              | Dtx3l          | deltex 3-like (Drosophila)                       | 209200         | 577    | 1223   | 860    | 1699    | 2.12            | 1.49            | 2.94             | 1.42            | 0.0006           |
| 1422557_s_at            | Mt1            | metallothionein 1                                | 17748          | 2025   | 4960   | 3511   | 6722    | 2.45            | 1.73            | 3.32             | 1.41            | 0.003            |
| 1455500_at              | Rnf213         | ring finger protein 213                          | 629974         | 1013   | 1795   | 1276   | 3032    | 1.77            | 1.26            | 2.99             | 1.41            | 0.004            |
| 1417189_at              | Psme2          | proteasome (prosome, macropain) 28 subunit, beta | 19188          | 2076   | 3611   | 2568   | 4384    | 1.74            | 1.24            | 2.11             | 1.41            | 0.0001           |
| 1425719_a_at            | Nmi            | N-myc (and STAT) interactor                      | 64685          | 282    | 549    | 390    | 788     | 1.94            | 1.38            | 2.79             | 1.41            | 0.002            |
| 1426774_at              | Parp12         | poly (ADP-ribose) polymerase family, member 12   | 243771         | 800    | 1520   | 1082   | 2156    | 1.90            | 1.35            | 2.70             | 1.40            | 0.0004           |
| 1439825_at              | Dtx3l          | deltex 3-like (Drosophila)                       | 209200         | 181    | 407    | 289    | 506     | 2.25            | 1.60            | 2.80             | 1.40            | 0.0002           |
| 1456890_at              | Ddx58          | DEAD (Asp-Glu-Ala-Asp) box polypeptide 58        | 230073         | 299    | 693    | 496    | 978     | 2.32            | 1.66            | 3.27             | 1.40            | 0.0001           |
| 1427932_s_at            | 1200016E24 Rik | RIKEN cDNA 1200016E24 gene                       | 319202         | 974    | 1662   | 1191   | 2115    | 1.71            | 1.22            | 2.17             | 1.39            | 0.001            |
| 1431095_a_at            | Herc5          | hect domain and RLD 5                            | 67138          | 374    | 548    | 395    | 762     | 1.47            | 1.06            | 2.04             | 1.39            | 0.03             |
| 1438498_at              | Zmynd15        | zinc finger, MYND-type containing 15             | 574428         | 63     | 137    | 99     | 183     | 2.16            | 1.57            | 2.90             | 1.38            | 0.03             |
| 1449591_at              | Casp4          | caspase 4, apoptosis-related cysteine peptidase  | 12363          | 269    | 1074   | 780    | 1271    | 4.00            | 2.91            | 4.73             | 1.38            | <0.0001          |
| 1422782_s_at            | Tlr3           | toll-like receptor 3                             | 142980         | 425    | 769    | 568    | 970     | 1.81            | 1.34            | 2.28             | 1.35            | 0.0008           |
| 1441855_x_at            | Cxcl1          | chemokine (C-X-C motif) ligand 1                 | 14825          | 1015   | 1759   | 1305   | 2341    | 1.73            | 1.29            | 2.31             | 1.35            | 0.003            |
| 1451775_s_at            | Il13ra1        | interleukin 13 receptor, alpha 1                 | 16164          | 207    | 376    | 279    | 532     | 1.81            | 1.35            | 2.57             | 1.34            | 0.0002           |
| 1454783_at              | Il13ra1        | interleukin 13 receptor, alpha 1                 | 16164          | 151    | 349    | 261    | 535     | 2.31            | 1.73            | 3.54             | 1.34            | 0.0003           |
| 1448940_at              | Trim21         | tripartite motif protein 21                      | 20821          | 456    | 819    | 617    | 1096    | 1.79            | 1.35            | 2.40             | 1.33            | 0.0006           |
| 1421358_at              | H2-M3          | histocompatibility 2, M region locus 3           | 14991          | 440    | 771    | 582    | 971     | 1.75            | 1.32            | 2.21             | 1.33            | 0.0001           |
| 1428660_s_at            | Tor3a          | torsin family 3, member A                        | 30935          | 507    | 787    | 596    | 1039    | 1.55            | 1.18            | 2.05             | 1.32            | 0.001            |
| 1454974_at              | Ntn1           | netrin 1                                         | 18208          | 254    | 572    | 433    | 828     | 2.25            | 1.71            | 3.26             | 1.32            | 0.008            |
| 1450387_s_at            | Ak3l1          | adenylate kinase 3 alpha-like 1                  | 11639          | 760    | 1344   | 1020   | 1631    | 1.77            | 1.34            | 2.15             | 1.32            | 0.03             |
| 1460603_at              | Samd9l         | sterile alpha motif domain containing 9-like     | 209086         | 1750   | 3161   | 2401   | 4144    | 1.81            | 1.37            | 2.37             | 1.32            | 0.002            |
| 1427164_at              | Il13ra1        | interleukin 13 receptor, alpha 1                 | 16164          | 65     | 163    | 124    | 271     | 2.51            | 1.91            | 4.16             | 1.31            | 0.003            |
| 1440169_x_at            | Ifnar2         | interferon (alpha and beta) receptor 2           | 15976          | 375    | 779    | 595    | 1031    | 2.08            | 1.59            | 2.75             | 1.31            | 0.007            |
| 1421217_a_at            | Lgals9         | lectin, galactose binding, soluble 9             | 16859          | 2063   | 3331   | 2545   | 4549    | 1.61            | 1.23            | 2.21             | 1.31            | 0.02             |
| 1436183_at              | 9830115L13 Rik | RIKEN cDNA 9830115L13 gene                       | 319257         | 969    | 1579   | 1230   | 2120    | 1.63            | 1.27            | 2.19             | 1.28            | 0.008            |

| Affymetrix Probe set ID | Gene symbol | Gene name                                                                             | Entrez Gene ID | Mean C | Mean T | Mean L | Mean TL | Fold change T/C | Fold change L/C | Fold change TL/C | Fold change T/L | p Value of ANOVA |
|-------------------------|-------------|---------------------------------------------------------------------------------------|----------------|--------|--------|--------|---------|-----------------|-----------------|------------------|-----------------|------------------|
| 1429159_at              | Itih5       | inter-alpha (globulin) inhibitor H5                                                   | 209378         | 78     | 119    | 93     | 285     | 1.53            | 1.19            | 3.66             | 1.28            | 0.005            |
| 1427091_at              | Znfx1       | zinc finger, NFX1-type containing 1                                                   | 98999          | 367    | 593    | 463    | 740     | 1.61            | 1.26            | 2.01             | 1.28            | 0.001            |
| 1427165_at              | Il13ra1     | interleukin 13 receptor, alpha 1                                                      | 16164          | 204    | 383    | 301    | 550     | 1.87            | 1.47            | 2.69             | 1.27            | 0.0002           |
| 1421236_at              | Ripk2       | receptor (TNFRSF)-interacting serine-threonine kinase 2                               | 192656         | 384    | 634    | 508    | 780     | 1.65            | 1.32            | 2.03             | 1.25            | 0.04             |
| 1444242_at              |             |                                                                                       |                | 722    | 1213   | 974    | 1517    | 1.68            | 1.35            | 2.10             | 1.24            | 0.01             |
| 1422573_at              | Ampd3       | AMP deaminase 3                                                                       | 11717          | 299    | 624    | 511    | 1035    | 2.09            | 1.71            | 3.47             | 1.22            | 0.007            |
| 1433699_at              | Tnfaip3     | tumor necrosis factor, alpha-induced protein 3                                        | 21929          | 489    | 1330   | 1090   | 2311    | 2.72            | 2.23            | 4.72             | 1.22            | 0.001            |
| 1421830_at              | Ak3l1       | adenylate kinase 3 alpha-like 1                                                       | 11639          | 653    | 1145   | 940    | 1375    | 1.75            | 1.44            | 2.11             | 1.22            | 0.02             |
| 1416016_at              | Tap1        | transporter 1, ATP-binding cassette, sub-family B (MDR/TAP)                           | 21354          | 446    | 715    | 588    | 1074    | 1.61            | 1.32            | 2.41             | 1.22            | 0.0003           |
| 1426511_at              | Susd2       | sushi domain containing 2                                                             | 71733          | 231    | 331    | 274    | 519     | 1.43            | 1.19            | 2.25             | 1.21            | 0.02             |
| 1422754_at              | Tmod1       | tropomodulin 1                                                                        | 21916          | 173    | 315    | 267    | 355     | 1.82            | 1.54            | 2.05             | 1.18            | 0.001            |
| 1455581_x_at            | Samd9l      | sterile alpha motif domain containing 9-like                                          | 209086         | 891    | 1413   | 1204   | 1875    | 1.59            | 1.35            | 2.11             | 1.17            | 0.008            |
| 1417978_at              | Eif4e3      | eukaryotic translation initiation factor 4E member 3                                  | 66892          | 241    | 348    | 297    | 521     | 1.44            | 1.23            | 2.16             | 1.17            | 0.04             |
| 1420913_at              | Slco2a1     | solute carrier organic anion transporter family, member 2a1                           | 24059          | 1486   | 2355   | 2018   | 3070    | 1.58            | 1.36            | 2.07             | 1.17            | <0.0001          |
| 1436562_at              | Ddx58       | DEAD (Asp-Glu-Ala-Asp) box polypeptide 58                                             | 230073         | 1245   | 2520   | 2170   | 4150    | 2.02            | 1.74            | 3.33             | 1.16            | 0.0004           |
| 1453913_a_at            | Tap2        | transporter 2, ATP-binding cassette, sub-family B (MDR/TAP)                           | 21355          | 424    | 673    | 582    | 1000    | 1.59            | 1.37            | 2.36             | 1.16            | 0.0008           |
| 1441811_x_at            | Tmem176a    | transmembrane protein 176A                                                            | 66058          | 669    | 1659   | 1436   | 2021    | 2.48            | 2.15            | 3.02             | 1.16            | 0.02             |
| 1427689_a_at            | Tnfr1       | TNFAIP3 interacting protein 1                                                         | 57783          | 1491   | 2342   | 2027   | 3343    | 1.57            | 1.36            | 2.24             | 1.16            | 0.001            |
| 1448914_a_at            | Csfl        | colony stimulating factor 1 (macrophage)                                              | 12977          | 3862   | 5953   | 5180   | 8053    | 1.54            | 1.34            | 2.09             | 1.15            | 0.02             |
| 1448306_at              | Nfkbia      | nuclear factor of kappa light chain gene enhancer in B-cells inhibitor, alpha         | 18035          | 895    | 3742   | 3262   | 5965    | 4.18            | 3.64            | 6.66             | 1.15            | <0.0001          |
| 1456586_x_at            | Mvp         | major vault protein                                                                   | 78388          | 731    | 1307   | 1146   | 1582    | 1.79            | 1.57            | 2.16             | 1.14            | 0.0005           |
| 1431843_a_at            | Nfkbie      | nuclear factor of kappa light polypeptide gene enhancer in B-cells inhibitor, epsilon | 18037          | 53     | 207    | 183    | 430     | 3.94            | 3.48            | 8.19             | 1.13            | 0.004            |
| 1451544_at              | Tapbpl      | TAP binding protein-like                                                              | 213233         | 218    | 325    | 287    | 496     | 1.49            | 1.32            | 2.28             | 1.13            | 0.002            |

| Affymetrix Probe set ID | Gene symbol | Gene name                                                                     | Entrez Gene ID | Mean C | Mean T | Mean L | Mean TL | Fold change T/C | Fold change L/C | Fold change TL/C | Fold change T/L | p Value of ANOVA |
|-------------------------|-------------|-------------------------------------------------------------------------------|----------------|--------|--------|--------|---------|-----------------|-----------------|------------------|-----------------|------------------|
| 1438561_x_at            | Tmem180     | transmembrane protein 180                                                     | 75146          | 121    | 273    | 243    | 274     | 2.26            | 2.01            | 2.27             | 1.12            | 0.02             |
| 1417130_s_at            | Angptl4     | angiopoietin-like 4                                                           | 57875          | 404    | 1039   | 935    | 1402    | 2.57            | 2.32            | 3.47             | 1.11            | 0.02             |
| 1452840_at              | 1500009L16  | RIKEN cDNA 1500009L16 gene                                                    | 69784          | 301    | 430    | 388    | 636     | 1.43            | 1.29            | 2.11             | 1.11            | 0.03             |
| 1449731_s_at            | Nfkbia      | nuclear factor of kappa light chain gene enhancer in B-cells inhibitor, alpha | 18035          | 1466   | 5182   | 4695   | 8323    | 3.54            | 3.20            | 5.68             | 1.10            | <0.0001          |
| 1423909_at              | Tmem176a    | transmembrane protein 176A                                                    | 66058          | 1153   | 2874   | 2613   | 3590    | 2.49            | 2.27            | 3.11             | 1.10            | 0.02             |
| 1415899_at              | Junb        | Jun-B oncogene                                                                | 16477          | 340    | 743    | 680    | 1038    | 2.19            | 2.00            | 3.06             | 1.09            | 0.0001           |
| 1417470_at              | Apobec3     | apolipoprotein B editing complex 3                                            | 80287          | 175    | 282    | 259    | 427     | 1.61            | 1.48            | 2.44             | 1.09            | 0.008            |
| 1438157_s_at            | Nfkbia      | nuclear factor of kappa light chain gene enhancer in B-cells inhibitor, alpha | 18035          | 2808   | 8462   | 7853   | 11604   | 3.01            | 2.80            | 4.13             | 1.08            | <0.0001          |
| 1420089_at              | Nfkbia      | nuclear factor of kappa light chain gene enhancer in B-cells inhibitor, alpha | 18035          | 333    | 600    | 560    | 877     | 1.80            | 1.68            | 2.63             | 1.07            | 0.0008           |
| 1448436_a_at            | Irf1        | interferon regulatory factor 1                                                | 16362          | 806    | 1295   | 1220   | 1777    | 1.61            | 1.51            | 2.20             | 1.06            | <0.0001          |
| 1450672_a_at            | Trex1       | three prime repair exonuclease 1                                              | 22040          | 288    | 454    | 430    | 702     | 1.58            | 1.49            | 2.44             | 1.06            | 0.003            |
| 1417719_at              | Sap30       | sin3 associated polypeptide                                                   | 60406          | 228    | 352    | 333    | 513     | 1.54            | 1.46            | 2.24             | 1.06            | 0.003            |
| 1425603_at              | Tmem176a    | transmembrane protein 176A                                                    | 66058          | 982    | 2377   | 2302   | 3272    | 2.42            | 2.34            | 3.33             | 1.03            | 0.01             |
| 1420088_at              | Nfkbia      | nuclear factor of kappa light chain gene enhancer in B-cells inhibitor, alpha | 18035          | 6521   | 13866  | 13479  | 16284   | 2.13            | 2.07            | 2.50             | 1.03            | <0.0001          |
| 1433930_at              | Hpse        | heparanase                                                                    | 15442          | 173    | 295    | 286    | 453     | 1.71            | 1.66            | 2.62             | 1.03            | 0.02             |
| 1418004_a_at            | Tmem176b    | transmembrane protein 176B                                                    | 65963          | 3116   | 5364   | 5248   | 6534    | 1.72            | 1.68            | 2.10             | 1.02            | 0.01             |
| 1439475_at              | 2810487A22  | RIKEN cDNA 2810487A22 gene                                                    | 72807          | 138    | 266    | 262    | 322     | 1.93            | 1.90            | 2.33             | 1.01            | 0.009            |
| 1455292_x_at            | Rsl1        | regulator of sex limited protein 1                                            | 380855         | 206    | 370    | 368    | 467     | 1.80            | 1.79            | 2.27             | 1.01            | 0.02             |

**Table SIII.a2.  $\alpha$ -LT $\beta$ R effect > TNF effect.**

| Affymetrix<br>Probe set ID | Gene symbol | Gene name                                                                      | Entrez<br>Gene<br>ID | Mean<br>C | Mean<br>T | Mean<br>L | Mean<br>TL | Fold<br>change<br>T/C | Fold<br>change<br>L/C | Fold<br>change<br>TL/C | Fold<br>change<br>L/T | p Value<br>of<br>ANOVA |
|----------------------------|-------------|--------------------------------------------------------------------------------|----------------------|-----------|-----------|-----------|------------|-----------------------|-----------------------|------------------------|-----------------------|------------------------|
| 1446190_at                 | Dclk1       | doublecortin-like kinase 1                                                     | 13175                | 169       | 201       | 514       | 406        | 1.19                  | 3.04                  | 2.40                   | 2.56                  | 0.01                   |
| 1424923_at                 | Serpina3g   | serine (or cysteine) peptidase inhibitor, clade A, member 3G                   | 20715                | 40        | 98        | 246       | 407        | 2.46                  | 6.20                  | 10.27                  | 2.50                  | 0.02                   |
| 1435940_at                 | AI836758    | expressed sequence AI836758                                                    | 99719                | 154       | 487       | 1156      | 1073       | 3.16                  | 7.52                  | 6.98                   | 2.38                  | 0.02                   |
| 1424270_at                 | Dclk1       | doublecortin-like kinase 1                                                     | 13175                | 134       | 507       | 1154      | 1056       | 3.77                  | 8.59                  | 7.86                   | 2.27                  | 0.01                   |
| 1436002_at                 | C230013L11  | RIKEN cDNA C230013L11 gene                                                     | 319712               | 78        | 292       | 645       | 1039       | 3.75                  | 8.31                  | 13.37                  | 2.22                  | 0.02                   |
|                            | Rik         |                                                                                |                      |           |           |           |            |                       |                       |                        |                       |                        |
| 1450863_a_at               | Dclk1       | doublecortin-like kinase 1                                                     | 13175                | 422       | 788       | 1628      | 1566       | 1.87                  | 3.86                  | 3.71                   | 2.08                  | 0.01                   |
| 1423125_at                 | Dclk1       | doublecortin-like kinase 1                                                     | 13175                | 164       | 243       | 479       | 455        | 1.49                  | 2.93                  | 2.79                   | 1.96                  | 0.02                   |
| 1424271_at                 | Dclk1       | doublecortin-like kinase 1                                                     | 13175                | 840       | 2240      | 4326      | 4604       | 2.67                  | 5.15                  | 5.48                   | 1.92                  | 0.02                   |
| 1422562_at                 | Rrad        | Ras-related associated with diabetes                                           | 56437                | 26        | 125       | 239       | 260        | 4.73                  | 9.07                  | 9.86                   | 1.92                  | 0.008                  |
| 1425902_a_at               | Nfkb2       | nuclear factor of kappa light polypeptide gene enhancer in B-cells 2, p49/p100 | 18034                | 160       | 539       | 958       | 1274       | 3.37                  | 5.99                  | 7.96                   | 1.79                  | 0.0009                 |
| 1451289_at                 | Dclk1       | doublecortin-like kinase 1                                                     | 13175                | 430       | 1366      | 2408      | 2459       | 3.18                  | 5.61                  | 5.72                   | 1.75                  | 0.02                   |
| 1422528_a_at               | Zfp3611     | zinc finger protein 36, C3H type-like 1                                        | 12192                | 571       | 609       | 1036      | 1181       | 1.07                  | 1.82                  | 2.07                   | 1.69                  | 0.003                  |
| 1436659_at                 | Dclk1       | doublecortin-like kinase 1                                                     | 13175                | 1345      | 4106      | 6778      | 6781       | 3.05                  | 5.04                  | 5.04                   | 1.64                  | 0.03                   |
| 1419156_at                 | Sox4        | SRY-box containing gene 4                                                      | 20677                | 467       | 796       | 1285      | 1347       | 1.71                  | 2.75                  | 2.89                   | 1.61                  | 0.001                  |
| 1436838_x_at               | Cotl1       | coactosin-like 1 (Dictyostelium)                                               | 72042                | 129       | 202       | 292       | 370        | 1.57                  | 2.27                  | 2.87                   | 1.45                  | 0.006                  |
| 1419157_at                 | Sox4        | SRY-box containing gene 4                                                      | 20677                | 580       | 1087      | 1552      | 1419       | 1.88                  | 2.68                  | 2.45                   | 1.43                  | 0.0006                 |
| 1419155_a_at               | Sox4        | SRY-box containing gene 4                                                      | 20677                | 1019      | 1425      | 1967      | 2057       | 1.40                  | 1.93                  | 2.02                   | 1.39                  | 0.01                   |
| 1428384_at                 | D4Bwg0951e  | DNA segment, Chr 4, Brigham & Women's Genetics 0951 expressed                  | 52829                | 2224      | 3310      | 4469      | 5124       | 1.49                  | 2.01                  | 2.30                   | 1.35                  | 0.05                   |
| 1432478_a_at               | Ibrdc3      | IBR domain containing 3                                                        | 75234                | 202       | 210       | 284       | 404        | 1.04                  | 1.40                  | 2.00                   | 1.35                  | 0.007                  |
| 1449370_at                 | Sox4        | SRY-box containing gene 4                                                      | 20677                | 273       | 490       | 654       | 865        | 1.79                  | 2.40                  | 3.17                   | 1.33                  | 0.0002                 |
| 1418854_at                 | Birc2       | baculoviral IAP repeat-containing 2                                            | 11797                | 1009      | 1519      | 2010      | 2825       | 1.51                  | 1.99                  | 2.80                   | 1.32                  | 0.005                  |
| 1415803_at                 | Cx3cl1      | chemokine (C-X3-C motif) ligand 1                                              | 20312                | 621       | 1128      | 1461      | 2593       | 1.82                  | 2.35                  | 4.18                   | 1.30                  | 0.004                  |
| 1417853_at                 | Clca1       | chloride channel calcium activated 1                                           | 12722                | 142       | 298       | 367       | 541        | 2.11                  | 2.59                  | 3.82                   | 1.23                  | 0.005                  |
| 1448167_at                 | Ifngr1      | interferon gamma receptor 1                                                    | 15979                | 1036      | 1513      | 1841      | 2261       | 1.46                  | 1.78                  | 2.18                   | 1.22                  | 0.006                  |
| 1429128_x_at               | Nfkb2       | nuclear factor of kappa light polypeptide gene enhancer in B-cells 2, p49/p100 | 18034                | 213       | 359       | 436       | 500        | 1.68                  | 2.04                  | 2.34                   | 1.22                  | 0.01                   |
| 1442819_at                 | Rhbdl2      | rhomboid, veinlet-like 2 (Drosophila)                                          | 230726               | 159       | 328       | 392       | 501        | 2.06                  | 2.46                  | 3.15                   | 1.19                  | <0.0001                |

| Affymetrix Probe set ID | Gene symbol    | Gene name                                                      | Entrez Gene ID | Mean C | Mean T | Mean L | Mean TL | Fold change T/C | Fold change L/C | Fold change TL/C | Fold change L/T | p Value of ANOVA |
|-------------------------|----------------|----------------------------------------------------------------|----------------|--------|--------|--------|---------|-----------------|-----------------|------------------|-----------------|------------------|
| 1449204_at              | Gjb5           | gap junction membrane channel protein beta 5                   | 14622          | 51     | 135    | 160    | 264     | 2.66            | 3.15            | 5.20             | 1.19            | 0.02             |
| 1418099_at              | Tnfrsf1b       | tumor necrosis factor receptor superfamily, member 1b          | 21938          | 240    | 307    | 361    | 547     | 1.28            | 1.51            | 2.28             | 1.18            | 0.02             |
| 1435488_at              | 1110019K23 Rik | RIKEN cDNA 1110019K23 gene                                     | 665563         | 450    | 834    | 977    | 1159    | 1.85            | 2.17            | 2.58             | 1.18            | 0.004            |
| 1455724_at              |                |                                                                |                | 348    | 573    | 666    | 797     | 1.64            | 1.91            | 2.29             | 1.16            | 0.0002           |
| 1440831_at              | Bach1          | BTB and CNC homology 1                                         | 12013          | 921    | 1210   | 1391   | 2025    | 1.31            | 1.51            | 2.20             | 1.15            | 0.001            |
| 1427739_a_at            | Trp53          | transformation related protein 53                              | 22059          | 660    | 1086   | 1246   | 1499    | 1.64            | 1.89            | 2.27             | 1.15            | 0.0004           |
| 1457780_at              | Stx11          | syntaxin 11                                                    | 74732          | 246    | 468    | 523    | 943     | 1.90            | 2.13            | 3.84             | 1.12            | <0.0001          |
| 1435396_at              | Stxbp6         | syntaxin binding protein 6 (amisyn)                            | 217517         | 145    | 208    | 230    | 500     | 1.44            | 1.59            | 3.45             | 1.10            | 0.04             |
| 1437087_at              | 2210408K08 Rik | RIKEN cDNA 2210408K08 gene                                     | 108743         | 424    | 551    | 604    | 900     | 1.30            | 1.42            | 2.12             | 1.10            | <0.0001          |
| 1417822_at              | D17H6S56E-5    | DNA segment, Chr 17, human D6S56E 5                            | 110956         | 1031   | 1312   | 1432   | 2126    | 1.27            | 1.39            | 2.06             | 1.09            | 0.002            |
| 1418587_at              | Traf3          | Tnf receptor-associated factor 3                               | 22031          | 1203   | 2026   | 2211   | 2504    | 1.68            | 1.84            | 2.08             | 1.09            | 0.0001           |
| 1457270_at              | B230343A10 Rik | RIKEN cDNA B230343A10 gene                                     | 320013         | 131    | 228    | 248    | 414     | 1.73            | 1.89            | 3.15             | 1.09            | 0.004            |
| 1417821_at              | D17H6S56E-5    | DNA segment, Chr 17, human D6S56E 5                            | 110956         | 704    | 1004   | 1091   | 1500    | 1.43            | 1.55            | 2.13             | 1.09            | 0.005            |
| 1434322_at              | Mical2         | MICAL-like 2                                                   | 231830         | 161    | 319    | 344    | 422     | 1.98            | 2.13            | 2.62             | 1.08            | 0.01             |
| 1417346_at              | Pycard         | PYD and CARD domain containing                                 | 66824          | 183    | 234    | 250    | 387     | 1.28            | 1.37            | 2.11             | 1.06            | 0.03             |
| 1421392_a_at            | Birc3          | baculoviral IAP repeat-containing 3                            | 11796          | 417    | 869    | 923    | 2071    | 2.08            | 2.21            | 4.96             | 1.06            | 0.0005           |
| 1426063_a_at            | Gem            | GTP binding protein (gene overexpressed in skeletal muscle)    | 14579          | 60     | 117    | 124    | 385     | 1.94            | 2.05            | 6.37             | 1.05            | 0.02             |
| 1426501_a_at            | T2bp           | Traf2 binding protein                                          | 211550         | 156    | 277    | 291    | 360     | 1.78            | 1.87            | 2.31             | 1.05            | 0.002            |
| 1422742_at              | Hivep1         | human immunodeficiency virus type I enhancer binding protein 1 | 110521         | 399    | 620    | 642    | 888     | 1.55            | 1.61            | 2.22             | 1.03            | 0.0003           |
| 1416295_a_at            | Il2rg          | interleukin 2 receptor, gamma chain                            | 16186          | 90     | 254    | 259    | 455     | 2.81            | 2.87            | 5.04             | 1.02            | 0.02             |
| 1423557_at              | Ifngr2         | interferon gamma receptor 2                                    | 15980          | 1091   | 1797   | 1816   | 2198    | 1.65            | 1.66            | 2.02             | 1.01            | 0.004            |

**Table SIII.a3. TNF plus  $\alpha$ -LT $\beta$ R hyperinduction.**

| Affymetrix Probe set ID | Gene symbol | Gene name                                                   | Entrez Gene ID | Mean C | Mean T | Mean L | Mean TL | Fold change T/C | Fold change L/C | Fold change TL/C | p Value of ANOVA | p Value of Synergy | Synergy |
|-------------------------|-------------|-------------------------------------------------------------|----------------|--------|--------|--------|---------|-----------------|-----------------|------------------|------------------|--------------------|---------|
| 1460407_at              | Spib        | Spi-B transcription factor (Spi-1/PU.1 related)             | 272382         | 85     | 98     | 132    | 377     | 1.15            | 1.55            | 4.43             | 0.05             | 0.03               | 5.60    |
| 1437932_a_at            | Cldn1       | claudin 1                                                   | 12737          | 41     | 42     | 100    | 269     | 1.03            | 2.43            | 6.56             | 0.03             | 0.04               | 3.93    |
| 1449277_at              | Ccl19       | chemokine (C-C motif) ligand 19                             | 24047          | 71     | 186    | 191    | 816     | 2.63            | 2.71            | 11.55            | 0.009            | 0.0003             | 3.22    |
| 1418126_at              | Ccl5        | chemokine (C-C motif) ligand 5                              | 20304          | 13     | 1460   | 257    | 5280    | 114.57          | 20.15           | 414.30           | <0.0001          | 0.005              | 3.13    |
| 1418930_at              | Cxcl10      | chemokine (C-X-C motif) ligand 10                           | 15945          | 32     | 201    | 364    | 1554    | 6.29            | 11.37           | 48.60            | 0.0003           | 0.01               | 3.07    |
| 1448859_at              | Cxcl13      | chemokine (C-X-C motif) ligand 13                           | 55985          | 156    | 245    | 189    | 507     | 1.57            | 1.21            | 3.25             | 0.01             | 0.005              | 2.97    |
| 1449009_at              | Tgtp        | T-cell specific GTPase                                      | 21822          | 345    | 1748   | 602    | 3794    | 5.06            | 1.74            | 10.99            | 0.0006           | 0.04               | 2.24    |
| 1434380_at              | Gbp6        | guanylate binding protein 6                                 | 229900         | 265    | 677    | 333    | 1229    | 2.55            | 1.26            | 4.64             | 0.002            | 0.01               | 2.16    |
| 1421228_at              | Ccl7        | chemokine (C-C motif) ligand 7                              | 20306          | 22     | 899    | 246    | 2303    | 41.62           | 11.39           | 106.61           | 0.0007           | 0.03               | 2.09    |
| 1420380_at              | Ccl2        | chemokine (C-C motif) ligand 2                              | 20296          | 111    | 2695   | 680    | 6319    | 24.35           | 6.14            | 57.10            | 0.0008           | 0.04               | 1.99    |
| 1450829_at              | Tnfaip3     | tumor necrosis factor, alpha-induced protein 3              | 21929          | 139    | 272    | 219    | 556     | 1.95            | 1.57            | 4.00             | 0.0001           | 0.01               | 1.98    |
| 1448898_at              | Ccl9        | chemokine (C-C motif) ligand 9                              | 20308          | 452    | 649    | 1088   | 2051    | 1.44            | 2.41            | 4.54             | 0.0009           | 0.01               | 1.96    |
| 1418392_a_at            | Gbp3        | guanylate nucleotide binding protein 3                      | 55932          | 268    | 1594   | 533    | 3340    | 5.95            | 1.99            | 12.46            | 0.0006           | 0.02               | 1.95    |
| 1453228_at              | Stx11       | syntaxin 11                                                 | 74732          | 362    | 586    | 693    | 1409    | 1.62            | 1.92            | 3.89             | <0.0001          | 0.004              | 1.92    |
| 1417936_at              | Ccl9        | chemokine (C-C motif) ligand 9                              | 20308          | 866    | 1164   | 1914   | 3403    | 1.34            | 2.21            | 3.93             | 0.0009           | 0.02               | 1.92    |
| 1448632_at              | Psmb10      | proteasome (prosome, macropain) subunit, beta type 10       | 19171          | 334    | 1109   | 663    | 2291    | 3.32            | 1.98            | 6.85             | 0.0006           | 0.03               | 1.89    |
| 1439831_at              | EG240327    | predicted gene, EG240327                                    | 240327         | 84     | 204    | 119    | 370     | 2.42            | 1.41            | 4.41             | 0.004            | 0.01               | 1.87    |
| 1451564_at              | Parp14      | poly (ADP-ribose) polymerase family, member 14              | 547253         | 164    | 459    | 345    | 1012    | 2.79            | 2.10            | 6.16             | 0.001            | 0.03               | 1.80    |
| 1449195_s_at            | Cxcl16      | chemokine (C-X-C motif) ligand 16                           | 66102          | 99     | 585    | 247    | 1206    | 5.91            | 2.49            | 12.19            | 0.0001           | 0.03               | 1.79    |
| 1453757_at              | Herc5       | hect domain and RLD 5                                       | 67138          | 99     | 200    | 129    | 330     | 2.01            | 1.29            | 3.32             | 0.002            | 0.01               | 1.78    |
| 1415804_at              | Cx3cl1      | chemokine (C-X3-C motif) ligand 1                           | 20312          | 215    | 325    | 421    | 805     | 1.52            | 1.96            | 3.75             | 0.03             | 0.01               | 1.78    |
| 1449025_at              | Ifit3       | interferon-induced protein with tetratricopeptide repeats 3 | 15959          | 1358   | 3864   | 1711   | 6053    | 2.84            | 1.26            | 4.46             | 0.004            | 0.03               | 1.76    |
| 1419043_a_at            | Iigp1       | interferon inducible GTPase 1                               | 60440          | 483    | 1569   | 702    | 2624    | 3.25            | 1.45            | 5.44             | 0.005            | 0.01               | 1.76    |

| Affymetrix Probe set ID | Gene symbol | Gene name                                                                                | Entrez Gene ID | Mean C | Mean T | Mean L | Mean TL | Fold change T/C | Fold change L/C | Fold change TL/C | p Value of ANOVA | p Value of Synergy | Synergy |
|-------------------------|-------------|------------------------------------------------------------------------------------------|----------------|--------|--------|--------|---------|-----------------|-----------------|------------------|------------------|--------------------|---------|
| 1458299_s_at            | Nfkbie      | nuclear factor of kappa light polypeptide gene enhancer in B-cells inhibitor, epsilon    | 18037          | 67     | 398    | 365    | 1156    | 5.96            | 5.47            | 17.31            | 0.003            | 0.04               | 1.74    |
| 1438716_at              | AI451617    | expressed sequence AI451617                                                              | 209387         | 174    | 270    | 202    | 389     | 1.55            | 1.16            | 2.24             | 0.001            | 0.05               | 1.73    |
| 1419042_at              | Iigp1       | interferon inducible GTPase 1                                                            | 60440          | 262    | 979    | 417    | 1676    | 3.73            | 1.59            | 6.39             | 0.005            | 0.02               | 1.72    |
| 1424067_at              | Icam1       | intercellular adhesion molecule                                                          | 15894          | 401    | 1742   | 1455   | 4417    | 4.35            | 3.63            | 11.03            | 0.0008           | 0.01               | 1.71    |
| 1417300_at              | Smpdl3b     | sphingomyelin phosphodiesterase, acid-like 3B                                            | 100340         | 148    | 274    | 175    | 402     | 1.85            | 1.19            | 2.72             | 0.003            | 0.05               | 1.69    |
| 1418191_at              | Usp18       | ubiquitin specific peptidase 18                                                          | 24110          | 458    | 1240   | 548    | 1800    | 2.71            | 1.20            | 3.93             | 0.02             | 0.04               | 1.68    |
| 1451777_at              | BC013672    | cDNA sequence BC013672                                                                   | 234311         | 30     | 171    | 59     | 273     | 5.70            | 1.97            | 9.09             | 0.01             | 0.02               | 1.67    |
| 1460469_at              | Tnfrsf9     | tumor necrosis factor receptor superfamily, member 9                                     | 21942          | 49     | 356    | 139    | 699     | 7.32            | 2.86            | 14.35            | 0.0002           | 0.002              | 1.64    |
| 1450783_at              | Ifit1       | interferon-induced protein with tetratricopeptide repeats 1                              | 15957          | 536    | 2411   | 913    | 3923    | 4.50            | 1.70            | 7.31             | 0.01             | 0.03               | 1.64    |
| 1460444_at              | Arrb1       | arrestin, beta 1                                                                         | 109689         | 172    | 212    | 259    | 372     | 1.24            | 1.51            | 2.17             | 0.02             | 0.008              | 1.59    |
| 1419209_at              | Cxcl1       | chemokine (C-X-C motif) ligand 1                                                         | 14825          | 107    | 760    | 369    | 1530    | 7.11            | 3.45            | 14.33            | 0.004            | 0.04               | 1.56    |
| 1422962_a_at            | Psmb8       | proteasome (prosome, macropain) subunit, beta type 8 (large multifunctional peptidase 7) | 16913          | 117    | 783    | 291    | 1419    | 6.71            | 2.49            | 12.17            | <0.0001          | 0.003              | 1.56    |
| 1423555_a_at            | Ifi44       | interferon-induced protein 44                                                            | 99899          | 285    | 1749   | 526    | 2917    | 6.13            | 1.84            | 10.22            | 0.008            | 0.03               | 1.55    |
| 1429947_a_at            | Zbp1        | Z-DNA binding protein 1                                                                  | 58203          | 15     | 181    | 29     | 289     | 11.83           | 1.90            | 18.87            | 0.01             | 0.04               | 1.53    |
| 1438676_at              | Mpa2l       | macrophage activation 2 like                                                             | 100702         | 64     | 249    | 96     | 379     | 3.90            | 1.51            | 5.94             | 0.001            | 0.04               | 1.52    |
| 1429310_at              | Flrt3       | fibronectin leucine rich transmembrane protein 3                                         | 71436          | 119    | 150    | 240    | 342     | 1.26            | 2.02            | 2.87             | 0.03             | 0.03               | 1.51    |
| 1418718_at              | Cxcl16      | chemokine (C-X-C motif) ligand 16                                                        | 66102          | 248    | 1055   | 507    | 1856    | 4.26            | 2.05            | 7.49             | <0.0001          | 0.0006             | 1.50    |

**Table SIII.b1. TNF effect >  $\alpha$ -LT $\beta$ R effect (Top20).**

| Affymetrix<br>Probe set ID | Gene symbol | Gene name                               | Entrez<br>Gene<br>ID | Mean<br>C | Mean<br>T | Mean<br>L | Mean<br>TL | Fold<br>change<br>T/C | Fold<br>change<br>L/C | Fold<br>change<br>TL/C | Fold<br>change<br>T/L | p Value<br>of<br>ANOVA |
|----------------------------|-------------|-----------------------------------------|----------------------|-----------|-----------|-----------|------------|-----------------------|-----------------------|------------------------|-----------------------|------------------------|
| 1448881_at                 | Hp          | haptoglobin                             | 15439                | 85        | 1148      | 130       | 1212       | 13.56                 | 1.53                  | 14.32                  | 8.85                  | 0.003                  |
| 1450826_a_at               | Saa3        | serum amyloid A 3                       | 20210                | 95        | 867       | 101       | 1015       | 9.11                  | 1.06                  | 10.66                  | 8.62                  | 0.008                  |
| 1447927_at                 | Mpa2l       | macrophage activation 2 like            | 100702               | 11        | 387       | 63        | 798        | 36.65                 | 5.95                  | 75.60                  | 6.16                  | 0.004                  |
| 1427746_x_at               | H2-K1       | histocompatibility 2, K1, K region      | 14972                | 484       | 7251      | 1624      | 9607       | 14.99                 | 3.36                  | 19.86                  | 4.47                  | <0.0001                |
| 1436003_at                 | Vcam1       | vascular cell adhesion molecule 1       | 22329                | 103       | 1996      | 453       | 2899       | 19.47                 | 4.41                  | 28.28                  | 4.41                  | 0.0002                 |
| 1427747_a_at               | Lcn2        | lipocalin 2                             | 16819                | 334       | 3132      | 724       | 3515       | 9.39                  | 2.17                  | 10.54                  | 4.33                  | 0.02                   |
| 1435906_x_at               | Gbp2        | guanylate nucleotide binding protein 2  | 14469                | 291       | 2526      | 660       | 4228       | 8.68                  | 2.27                  | 14.53                  | 3.82                  | 0.0002                 |
| 1424921_at                 | Brd4        | bromodomain containing 4                | 57261                | 755       | 3507      | 987       | 3990       | 4.65                  | 1.31                  | 5.29                   | 3.55                  | 0.0002                 |
| 1417314_at                 | Cfb         | complement factor B                     | 14962                | 132       | 424       | 134       | 565        | 3.20                  | 1.01                  | 4.27                   | 3.17                  | 0.01                   |
| 1450424_a_at               | Il18bp      | interleukin 18 binding protein          | 16068                | 59        | 298       | 106       | 352        | 5.07                  | 1.81                  | 5.99                   | 2.80                  | 0.0009                 |
| 1453196_a_at               | Oasl2       | 2'-5' oligoadenylate synthetase-like 2  | 23962                | 84        | 692       | 247       | 1463       | 8.25                  | 2.95                  | 17.45                  | 2.80                  | 0.0005                 |
| 1424518_at                 | BC020489    | cDNA sequence BC020489                  | 223672               | 130       | 443       | 160       | 563        | 3.41                  | 1.23                  | 4.33                   | 2.76                  | 0.02                   |
| 1418580_at                 | Rtp4        | receptor transporter protein 4          | 67775                | 724       | 3892      | 1431      | 5403       | 5.37                  | 1.98                  | 7.46                   | 2.72                  | 0.003                  |
| 1453304_s_at               | Ly6e        | lymphocyte antigen 6 complex, locus E   | 17069                | 559       | 2775      | 1030      | 4701       | 4.96                  | 1.84                  | 8.40                   | 2.70                  | 0.0001                 |
| 1448550_at                 | Lbp         | lipopolysaccharide binding protein      | 16803                | 142       | 482       | 188       | 468        | 3.39                  | 1.33                  | 3.30                   | 2.56                  | 0.03                   |
| 1451426_at                 | Dhx58       | DEXH (Asp-Glu-X-His) box polypeptide 58 | 80861                | 38        | 300       | 117       | 444        | 7.86                  | 3.07                  | 11.63                  | 2.56                  | 0.02                   |
| 1451683_x_at               | H2-D1       | histocompatibility 2, D region locus 1  | 14964                | 943       | 3294      | 1290      | 4254       | 3.49                  | 1.37                  | 4.51                   | 2.55                  | 0.0001                 |
| 1420499_at                 | Gch1        | GTP cyclohydrolase 1                    | 14528                | 175       | 554       | 224       | 563        | 3.16                  | 1.28                  | 3.21                   | 2.47                  | 0.01                   |
| 1417961_a_at               | Trim30      | tripartite motif protein 30             | 20128                | 507       | 1271      | 548       | 1691       | 2.51                  | 1.08                  | 3.34                   | 2.32                  | 0.01                   |
| 1451821_a_at               | Sp100       | nuclear antigen Sp100                   | 20684                | 66        | 186       | 81        | 307        | 2.83                  | 1.23                  | 4.66                   | 2.29                  | 0.001                  |



**Table SIII.b2.  $\alpha$ -LT $\beta$ R effect > TNF effect (Top20).**

| Affymetrix<br>Probe set ID | Gene symbol | Gene name                                                                      | Entrez<br>Gene<br>ID | Mean<br>C | Mean<br>T | Mean<br>L | Mean<br>TL | Fold<br>change<br>T/C | Fold<br>change<br>L/C | Fold<br>change<br>TL/C | Fold<br>change<br>L/T | p Value<br>of<br>ANOVA |
|----------------------------|-------------|--------------------------------------------------------------------------------|----------------------|-----------|-----------|-----------|------------|-----------------------|-----------------------|------------------------|-----------------------|------------------------|
| 1446190_at                 | Dclk1       | doublecortin-like kinase 1                                                     | 13175                | 169       | 201       | 514       | 406        | 1.19                  | 3.04                  | 2.40                   | 2.56                  | 0.01                   |
| 1424923_at                 | Serpina3g   | serine (or cysteine) peptidase inhibitor, clade A, member 3G                   | 20715                | 40        | 98        | 246       | 407        | 2.46                  | 6.20                  | 10.27                  | 2.50                  | 0.02                   |
| 1435940_at                 | AI836758    | expressed sequence AI836758                                                    | 99719                | 154       | 487       | 1156      | 1073       | 3.16                  | 7.52                  | 6.98                   | 2.38                  | 0.02                   |
| 1422562_at                 | Rrad        | Ras-related associated with diabetes                                           | 56437                | 26        | 125       | 239       | 260        | 4.73                  | 9.07                  | 9.86                   | 1.92                  | 0.008                  |
| 1425902_a_at               | Nfkb2       | nuclear factor of kappa light polypeptide gene enhancer in B-cells 2, p49/p100 | 18034                | 160       | 539       | 958       | 1274       | 3.37                  | 5.99                  | 7.96                   | 1.79                  | 0.0009                 |
| 1422528_a_at               | Zfp361l1    | zinc finger protein 36, C3H type-like 1                                        | 12192                | 571       | 609       | 1036      | 1181       | 1.07                  | 1.82                  | 2.07                   | 1.69                  | 0.003                  |
| 1419156_at                 | Sox4        | SRY-box containing gene 4                                                      | 20677                | 467       | 796       | 1285      | 1347       | 1.71                  | 2.75                  | 2.89                   | 1.61                  | 0.001                  |
| 1436838_x_at               | Cotl1       | coactosin-like 1 (Dictyostelium)                                               | 72042                | 129       | 202       | 292       | 370        | 1.57                  | 2.27                  | 2.87                   | 1.45                  | 0.006                  |
| 1428384_at                 | D4Bwg0951e  | DNA segment, Chr 4, Brigham & Women's Genetics 0951 expressed                  | 52829                | 2224      | 3310      | 4469      | 5124       | 1.49                  | 2.01                  | 2.30                   | 1.35                  | 0.05                   |
| 1432478_a_at               | Ibrdc3      | IBR domain containing 3                                                        | 75234                | 202       | 210       | 284       | 404        | 1.04                  | 1.40                  | 2.00                   | 1.35                  | 0.007                  |
| 1418854_at                 | Birc2       | baculoviral IAP repeat-containing 2                                            | 11797                | 1009      | 1519      | 2010      | 2825       | 1.51                  | 1.99                  | 2.80                   | 1.32                  | 0.005                  |
| 1415803_at                 | Cx3cl1      | chemokine (C-X3-C motif) ligand 1                                              | 20312                | 621       | 1128      | 1461      | 2593       | 1.82                  | 2.35                  | 4.18                   | 1.30                  | 0.004                  |
| 1417853_at                 | Clca1       | chloride channel calcium activated 1                                           | 12722                | 142       | 298       | 367       | 541        | 2.11                  | 2.59                  | 3.82                   | 1.23                  | 0.005                  |
| 1448167_at                 | Ifngr1      | interferon gamma receptor 1                                                    | 15979                | 1036      | 1513      | 1841      | 2261       | 1.46                  | 1.78                  | 2.18                   | 1.22                  | 0.006                  |
| 1442819_at                 | Rhbdl2      | rhomboid, veinlet-like 2 (Drosophila)                                          | 230726               | 159       | 328       | 392       | 501        | 2.06                  | 2.46                  | 3.15                   | 1.19                  | <0.0001                |
| 1449204_at                 | Gjb5        | gap junction membrane channel protein beta 5                                   | 14622                | 51        | 135       | 160       | 264        | 2.66                  | 3.15                  | 5.20                   | 1.19                  | 0.02                   |
| 1418099_at                 | Tnfrsf1b    | tumor necrosis factor receptor superfamily, member 1b                          | 21938                | 240       | 307       | 361       | 547        | 1.28                  | 1.51                  | 2.28                   | 1.18                  | 0.02                   |
| 1455724_at                 | Prrgl       | proline rich Gla (G-carboxyglutamic acid) 1                                    | 546336               | 348       | 573       | 666       | 797        | 1.64                  | 1.91                  | 2.29                   | 1.16                  | 0.0002                 |
| 1440831_at                 | Bach1       | BTB and CNC homology 1                                                         | 12013                | 921       | 1210      | 1391      | 2025       | 1.31                  | 1.51                  | 2.20                   | 1.15                  | 0.001                  |
| 1427739_a_at               | Trp53       | transformation related protein 53                                              | 22059                | 660       | 1086      | 1246      | 1499       | 1.64                  | 1.89                  | 2.27                   | 1.15                  | 0.0004                 |

**Table SIII.b3. TNF plus  $\alpha$ -LT $\beta$ R hyperinduction (Top20).**

| Affymetrix Probe set ID | Gene symbol | Gene name                                                   | Entrez Gene ID | Mean C | Mean T | Mean L | Mean TL | Fold change T/C | Fold change L/C | Fold change TL/C | p Value of ANOVA | p Value of Synergy | Synergy |
|-------------------------|-------------|-------------------------------------------------------------|----------------|--------|--------|--------|---------|-----------------|-----------------|------------------|------------------|--------------------|---------|
| 1460407_at              | Spib        | Spi-B transcription factor (Spi-1/PU.1 related)             | 272382         | 85     | 98     | 132    | 377     | 1.15            | 1.55            | 4.43             | 0.05             | 0.03               | 5.60    |
| 1437932_a_at            | Cldn1       | claudin 1                                                   | 12737          | 41     | 42     | 100    | 269     | 1.03            | 2.43            | 6.56             | 0.03             | 0.04               | 3.93    |
| 1449277_at              | Ccl19       | chemokine (C-C motif) ligand 19                             | 24047          | 71     | 186    | 191    | 816     | 2.63            | 2.71            | 11.55            | 0.009            | 0.0003             | 3.22    |
| 1418126_at              | Ccl5        | chemokine (C-C motif) ligand 5                              | 20304          | 13     | 1460   | 257    | 5280    | 114.57          | 20.15           | 414.30           | <0.0001          | 0.005              | 3.13    |
| 1418930_at              | Cxcl10      | chemokine (C-X-C motif) ligand 10                           | 15945          | 32     | 201    | 364    | 1554    | 6.29            | 11.37           | 48.60            | 0.0003           | 0.01               | 3.07    |
| 1448859_at              | Cxcl13      | chemokine (C-X-C motif) ligand 13                           | 55985          | 156    | 245    | 189    | 507     | 1.57            | 1.21            | 3.25             | 0.01             | 0.005              | 2.97    |
| 1449009_at              | Tgtp        | T-cell specific GTPase                                      | 21822          | 345    | 1748   | 602    | 3794    | 5.06            | 1.74            | 10.99            | 0.0006           | 0.04               | 2.24    |
| 1434380_at              | Gbp6        | guanylate binding protein 6                                 | 229900         | 265    | 677    | 333    | 1229    | 2.55            | 1.26            | 4.64             | 0.002            | 0.01               | 2.16    |
| 1421228_at              | Ccl7        | chemokine (C-C motif) ligand 7                              | 20306          | 22     | 899    | 246    | 2303    | 41.62           | 11.39           | 106.61           | 0.0007           | 0.03               | 2.09    |
| 1420380_at              | Ccl2        | chemokine (C-C motif) ligand 2                              | 20296          | 111    | 2695   | 680    | 6319    | 24.35           | 6.14            | 57.10            | 0.0008           | 0.04               | 1.99    |
| 1450829_at              | Tnfaip3     | tumor necrosis factor, alpha-induced protein 3              | 21929          | 139    | 272    | 219    | 556     | 1.95            | 1.57            | 4.00             | 0.0001           | 0.01               | 1.98    |
| 1448898_at              | Ccl9        | chemokine (C-C motif) ligand 9                              | 20308          | 452    | 649    | 1088   | 2051    | 1.44            | 2.41            | 4.54             | 0.0009           | 0.01               | 1.96    |
| 1418392_a_at            | Gbp3        | guanylate nucleotide binding protein 3                      | 55932          | 268    | 1594   | 533    | 3340    | 5.95            | 1.99            | 12.46            | 0.0006           | 0.02               | 1.95    |
| 1453228_at              | Stx11       | syntaxin 11                                                 | 74732          | 362    | 586    | 693    | 1409    | 1.62            | 1.92            | 3.89             | <0.0001          | 0.004              | 1.92    |
| 1448632_at              | Psmb10      | proteasome (prosome, macropain) subunit, beta type 10       | 19171          | 334    | 1109   | 663    | 2291    | 3.32            | 1.98            | 6.85             | 0.0006           | 0.03               | 1.89    |
| 1439831_at              | EG240327    | predicted gene, EG240327                                    | 240327         | 84     | 204    | 119    | 370     | 2.42            | 1.41            | 4.41             | 0.004            | 0.01               | 1.87    |
| 1451564_at              | Parp14      | poly (ADP-ribose) polymerase family, member 14              | 547253         | 164    | 459    | 345    | 1012    | 2.79            | 2.10            | 6.16             | 0.001            | 0.03               | 1.80    |
| 1449195_s_at            | Cxcl16      | chemokine (C-X-C motif) ligand 16                           | 66102          | 99     | 585    | 247    | 1206    | 5.91            | 2.49            | 12.19            | 0.0001           | 0.03               | 1.79    |
| 1453757_at              | Herc5       | hect domain and RLD 5                                       | 67138          | 99     | 200    | 129    | 330     | 2.01            | 1.29            | 3.32             | 0.002            | 0.01               | 1.78    |
| 1449025_at              | Ifit3       | interferon-induced protein with tetratricopeptide repeats 3 | 15959          | 1358   | 3864   | 1711   | 6053    | 2.84            | 1.26            | 4.46             | 0.004            | 0.03               | 1.76    |

**Table SIII.c. Interferon signature.**

| Affymetrix<br>Probe set ID | Gene symbol | Gene name                                                                           | Entrez<br>Gene<br>ID | Mean<br>C | Mean<br>T | Mean<br>L | Mean<br>TL | Fold<br>change<br>T/C | Fold<br>change<br>L/C | Fold<br>change<br>TL/C | Fold<br>change<br>T/L | p Value<br>of<br>ANOVA |
|----------------------------|-------------|-------------------------------------------------------------------------------------|----------------------|-----------|-----------|-----------|------------|-----------------------|-----------------------|------------------------|-----------------------|------------------------|
| 1420088_at                 | Nfkbia      | nuclear factor of kappa light polypeptide gene enhancer in B-cells inhibitor, alpha | 18035                | 6521      | 13866     | 13479     | 16284      | 2.13                  | 2.07                  | 2.50                   | 1.03                  | <0.0001                |
| 1438157_s_at               | Nfkbia      | nuclear factor of kappa light polypeptide gene enhancer in B-cells inhibitor, alpha | 18035                | 2808      | 8462      | 7853      | 11604      | 3.01                  | 2.80                  | 4.13                   | 1.08                  | <0.0001                |
| 1425336_x_at               | H2-K1       | histocompatibility 2, K1, K region                                                  | 14972                | 2371      | 9605      | 4787      | 11557      | 4.05                  | 2.02                  | 4.87                   | 2.01                  | <0.0001                |
| 1448162_at                 | Vcam1       | vascular cell adhesion molecule 1                                                   | 22329                | 1841      | 7170      | 4474      | 10628      | 3.89                  | 2.43                  | 5.77                   | 1.60                  | <0.0001                |
| 1428942_at                 | Mt2         | metallothionein 2                                                                   | 17750                | 1717      | 7241      | 4059      | 9659       | 4.22                  | 2.36                  | 5.63                   | 1.78                  | 0.001                  |
| 1427746_x_at               | H2-K1       | histocompatibility 2, K1, K region                                                  | 14972                | 484       | 7251      | 1624      | 9607       | 14.99                 | 3.36                  | 19.86                  | 4.47                  | <0.0001                |
| 1425545_x_at               | H2-L        | histocompatibility 2, D region                                                      | 14980                | 2172      | 6795      | 3180      | 8778       | 3.13                  | 1.46                  | 4.04                   | 2.14                  | <0.0001                |
| 1449731_s_at               | Nfkbia      | nuclear factor of kappa light polypeptide gene enhancer in B-cells inhibitor, alpha | 18035                | 1466      | 5182      | 4695      | 8323       | 3.54                  | 3.20                  | 5.68                   | 1.10                  | <0.0001                |
| 1421812_at                 | Tapbp       | TAP binding protein                                                                 | 21356                | 2751      | 6688      | 3917      | 8239       | 2.43                  | 1.42                  | 2.99                   | 1.71                  | <0.0001                |
| 1451784_x_at               | H2-D1       | histocompatibility 2, D region locus 1                                              | 14964                | 1874      | 6157      | 2927      | 8183       | 3.29                  | 1.56                  | 4.37                   | 2.10                  | <0.0001                |
| 1448914_a_at               | Csf1        | colony stimulating factor 1 (macrophage)                                            | 12977                | 3862      | 5953      | 5180      | 8053       | 1.54                  | 1.34                  | 2.09                   | 1.15                  | 0.02                   |
| 1423954_at                 | C3          | complement component 3                                                              | 12266                | 500       | 4353      | 2107      | 7194       | 8.70                  | 4.21                  | 14.38                  | 2.07                  | 0.02                   |
| 1422557_s_at               | Mt1         | metallothionein 1                                                                   | 17748                | 2025      | 4960      | 3511      | 6722       | 2.45                  | 1.73                  | 3.32                   | 1.41                  | 0.003                  |
| 1448380_at                 | Lgals3bp    | lectin, galactoside-binding, soluble, 3 binding protein                             | 19039                | 2304      | 5060      | 2725      | 6328       | 2.20                  | 1.18                  | 2.75                   | 1.86                  | 0.002                  |
| 1420380_at                 | Ccl2        | chemokine (C-C motif) ligand 2                                                      | 20296                | 111       | 2695      | 680       | 6319       | 24.35                 | 6.14                  | 57.10                  | 3.96                  | 0.0008                 |
| 1415989_at                 | Vcam1       | vascular cell adhesion molecule 1                                                   | 22329                | 838       | 3396      | 2185      | 6175       | 4.05                  | 2.61                  | 7.37                   | 1.55                  | <0.0001                |
| 1445897_s_at               | Ifi35       | interferon-induced protein 35                                                       | 70110                | 2919      | 5011      | 3451      | 6124       | 1.72                  | 1.18                  | 2.10                   | 1.45                  | 0.002                  |
| 1449025_at                 | Ifit3       | interferon-induced protein with tetratricopeptide repeats 3                         | 15959                | 1358      | 3864      | 1711      | 6053       | 2.84                  | 1.26                  | 4.46                   | 2.26                  | 0.004                  |
| 1448306_at                 | Nfkbia      | nuclear factor of kappa light polypeptide gene enhancer in B-cells inhibitor, alpha | 18035                | 895       | 3742      | 3262      | 5965       | 4.18                  | 3.64                  | 6.66                   | 1.15                  | <0.0001                |
| 1418580_at                 | Rtp4        | receptor transporter protein 4                                                      | 67775                | 724       | 3892      | 1431      | 5403       | 5.37                  | 1.98                  | 7.46                   | 2.72                  | 0.003                  |
| 1418126_at                 | Ccl5        | chemokine (C-C motif) ligand 5                                                      | 20304                | 13        | 1460      | 257       | 5280       | 114.57                | 20.15                 | 414.30                 | 5.69                  | <0.0001                |
| 1451314_a_at               | Vcam1       | vascular cell adhesion molecule 1                                                   | 22329                | 559       | 3670      | 1363      | 5081       | 6.56                  | 2.44                  | 9.08                   | 2.69                  | <0.0001                |
| 1449556_at                 | H2-T23      | histocompatibility 2, T region locus                                                | 15040                | 1254      | 3683      | 1665      | 5016       | 2.94                  | 1.33                  | 4.00                   | 2.21                  | 0.0002                 |

| Affymetrix Probe set ID | Gene symbol | Gene name                                                   | Entrez Gene ID | Mean C | Mean T | Mean L | Mean TL | Fold change T/C | Fold change L/C | Fold change TL/C | Fold change T/L | p Value of ANOVA |
|-------------------------|-------------|-------------------------------------------------------------|----------------|--------|--------|--------|---------|-----------------|-----------------|------------------|-----------------|------------------|
| 1453304_s_at            | Ly6e        | lymphocyte antigen 6 complex, locus E                       | 17069          | 559    | 2775   | 1030   | 4701    | 4.96            | 1.84            | 8.40             | 2.70            | 0.0001           |
| 1418825_at              | Irgm1       | immunity-related GTPase family M member 1                   | 15944          | 2177   | 4176   | 2663   | 4619    | 1.92            | 1.22            | 2.12             | 1.57            | 0.03             |
| 1421217_a_at            | Lgals9      | lectin, galactose binding, soluble 9                        | 16859          | 2063   | 3331   | 2545   | 4549    | 1.61            | 1.23            | 2.21             | 1.31            | 0.02             |
| 1424067_at              | Icam1       | intercellular adhesion molecule 1                           | 15894          | 401    | 1742   | 1455   | 4417    | 4.35            | 3.63            | 11.03            | 1.20            | 0.0008           |
| 1450034_at              | Stat1       | signal transducer and activator of transcription 1          | 20846          | 946    | 2819   | 1566   | 4274    | 2.98            | 1.66            | 4.52             | 1.80            | 0.0009           |
| 1451683_x_at            | H2-K1       | histocompatibility 2, K1, K region                          | 14972          | 943    | 3294   | 1290   | 4254    | 3.49            | 1.37            | 4.51             | 2.55            | 0.0001           |
| 1435906_x_at            | Gbp2        | guanylate binding protein 2                                 | 14469          | 291    | 2526   | 660    | 4228    | 8.68            | 2.27            | 14.53            | 3.82            | 0.0002           |
| 1436562_at              | Ddx58       | DEAD (Asp-Glu-Ala-Asp) box polypeptide 58                   | 230073         | 1245   | 2520   | 2170   | 4150    | 2.02            | 1.74            | 3.33             | 1.16            | 0.0004           |
| 1460603_at              | Samd9l      | sterile alpha motif domain containing 9-like                | 209086         | 1750   | 3161   | 2401   | 4144    | 1.81            | 1.37            | 2.37             | 1.32            | 0.002            |
| 1424921_at              | Brd4        | bromodomain containing 4                                    | 57261          | 755    | 3507   | 987    | 3990    | 4.65            | 1.31            | 5.29             | 3.55            | 0.0002           |
| 1450783_at              | Ifit1       | interferon-induced protein with tetratricopeptide repeats 1 | 15957          | 536    | 2411   | 913    | 3923    | 4.50            | 1.70            | 7.31             | 2.64            | 0.01             |
| 1417292_at              | Ifi47       | interferon gamma inducible protein 47                       | 15953          | 871    | 2393   | 1567   | 3886    | 2.75            | 1.80            | 4.46             | 1.53            | 0.0003           |
| 1449009_at              | Tgtp        | T-cell specific GTPase                                      | 21822          | 345    | 1748   | 602    | 3794    | 5.06            | 1.74            | 10.99            | 2.90            | 0.0006           |
| 1418240_at              | Gbp2        | guanylate binding protein 2                                 | 14469          | 292    | 2362   | 690    | 3721    | 8.09            | 2.36            | 12.75            | 3.42            | <0.0001          |
| 1424948_x_at            | H2-K1       | histocompatibility 2, K1, K region                          | 14972          | 417    | 2437   | 696    | 3628    | 5.84            | 1.67            | 8.70             | 3.50            | <0.0001          |
| 1418392_a_at            | Gbp3        | guanylate binding protein 3                                 | 55932          | 268    | 1594   | 533    | 3340    | 5.95            | 1.99            | 12.46            | 2.99            | 0.0006           |
| 1431591_s_at            | 677168      | predicted gene, 677168                                      | 677168         | 547    | 2194   | 809    | 3154    | 4.01            | 1.48            | 5.76             | 2.71            | 0.003            |
| 1420913_at              | Slco2a1     | solute carrier organic anion transporter family, member 2a1 | 24059          | 1486   | 2355   | 2018   | 3070    | 1.58            | 1.36            | 2.07             | 1.17            | <0.0001          |
| 1423555_a_at            | Ifi44       | interferon-induced protein 44                               | 99899          | 285    | 1749   | 526    | 2917    | 6.13            | 1.84            | 10.22            | 3.33            | 0.008            |
| 1436003_at              | Vcam1       | vascular cell adhesion molecule 1                           | 22329          | 103    | 1996   | 453    | 2899    | 19.47           | 4.41            | 28.28            | 4.41            | 0.0002           |
| 1418854_at              | Birc2       | baculoviral IAP repeat-containing 2                         | 11797          | 1009   | 1519   | 2010   | 2825    | 1.51            | 1.99            | 2.80             | 0.76            | 0.005            |
| 1452349_x_at            | Ifi205      | interferon activated gene 205                               | 226695         | 651    | 1826   | 971    | 2806    | 2.81            | 1.49            | 4.31             | 1.88            | 0.003            |
| 1443698_at              | Xaf1        | XIAP associated factor 1                                    | 327959         | 796    | 1926   | 1036   | 2663    | 2.42            | 1.30            | 3.34             | 1.86            | 0.01             |
| 1450378_at              | Tapbp       | TAP binding protein                                         | 21356          | 802    | 1871   | 1209   | 2627    | 2.33            | 1.51            | 3.27             | 1.55            | 0.0001           |
| 1415803_at              | Cx3cl1      | chemokine (C-X3-C motif) ligand 1                           | 20312          | 621    | 1128   | 1461   | 2593    | 1.82            | 2.35            | 4.18             | 0.77            | 0.004            |
| 1450033_a_at            | Stat1       | signal transducer and activator of transcription 1          | 20846          | 588    | 1804   | 997    | 2544    | 3.07            | 1.70            | 4.33             | 1.81            | 0.001            |
| 1441855_x_at            | Cxcl1       | chemokine (C-X-C motif) ligand 1                            | 14825          | 1015   | 1759   | 1305   | 2341    | 1.73            | 1.29            | 2.31             | 1.35            | 0.003            |

| Affymetrix Probe set ID | Gene symbol    | Gene name                                                                                | Entrez Gene ID | Mean C | Mean T | Mean L | Mean TL | Fold change T/C | Fold change L/C | Fold change TL/C | Fold change T/L | p Value of ANOVA |
|-------------------------|----------------|------------------------------------------------------------------------------------------|----------------|--------|--------|--------|---------|-----------------|-----------------|------------------|-----------------|------------------|
| 1433699_at              | Tnfaip3        | tumor necrosis factor, alpha-induced protein 3                                           | 21929          | 489    | 1330   | 1090   | 2311    | 2.72            | 2.23            | 4.72             | 1.22            | 0.001            |
| 1421228_at              | Ccl7           | chemokine (C-C motif) ligand 7                                                           | 20306          | 22     | 899    | 246    | 2303    | 41.62           | 11.39           | 106.61           | 3.66            | 0.0007           |
| 1448632_at              | Psmb10         | proteasome (prosome, macropain) subunit, beta type 10                                    | 19171          | 334    | 1109   | 663    | 2291    | 3.32            | 1.98            | 6.85             | 1.67            | 0.0006           |
| 1448167_at              | Ifngr1         | interferon gamma receptor 1                                                              | 15979          | 1036   | 1513   | 1841   | 2261    | 1.46            | 1.78            | 2.18             | 0.82            | 0.006            |
| 1423557_at              | Ifngr2         | interferon gamma receptor 2                                                              | 15980          | 1091   | 1797   | 1816   | 2198    | 1.65            | 1.66            | 2.02             | 0.99            | 0.004            |
| 1426276_at              | Ifih1          | interferon induced with helicase C domain 1                                              | 71586          | 629    | 1582   | 876    | 2178    | 2.52            | 1.39            | 3.47             | 1.81            | 0.003            |
| 1426774_at              | Parp12         | poly (ADP-ribose) polymerase family, member 12                                           | 243771         | 800    | 1520   | 1082   | 2156    | 1.90            | 1.35            | 2.70             | 1.40            | 0.0004           |
| 1436183_at              | 9830115L13 Rik | RIKEN cDNA 9830115L13 gene                                                               | 319257         | 969    | 1579   | 1230   | 2120    | 1.63            | 1.27            | 2.19             | 1.28            | 0.008            |
| 1421392_a_at            | Birc3          | baculoviral IAP repeat-containing 3                                                      | 11796          | 417    | 869    | 923    | 2071    | 2.08            | 2.21            | 4.96             | 0.94            | 0.0005           |
| 1417793_at              | Iigp2          | interferon inducible GTPase 2                                                            | 54396          | 423    | 1103   | 632    | 1864    | 2.61            | 1.49            | 4.40             | 1.74            | 0.0006           |
| 1418718_at              | Cxcl16         | chemokine (C-X-C motif) ligand 16                                                        | 66102          | 248    | 1055   | 507    | 1856    | 4.26            | 2.05            | 7.49             | 2.08            | <0.0001          |
| 1419132_at              | Tlr2           | toll-like receptor 2                                                                     | 24088          | 373    | 1305   | 790    | 1825    | 3.50            | 2.12            | 4.89             | 1.65            | <0.0001          |
| 1418191_at              | Usp18          | ubiquitin specific peptidase 18                                                          | 24110          | 458    | 1240   | 548    | 1800    | 2.71            | 1.20            | 3.93             | 2.26            | 0.02             |
| 1448436_a_at            | Irf1           | interferon regulatory factor 1                                                           | 16362          | 806    | 1295   | 1220   | 1777    | 1.61            | 1.51            | 2.20             | 1.06            | <0.0001          |
| 1420915_at              | Stat1          | signal transducer and activator of transcription 1                                       | 20846          | 472    | 1320   | 718    | 1775    | 2.79            | 1.52            | 3.76             | 1.84            | 0.0008           |
| 1435208_at              | Dtx3l          | deltex 3-like (Drosophila)                                                               | 209200         | 577    | 1223   | 860    | 1699    | 2.12            | 1.49            | 2.94             | 1.42            | 0.0006           |
| 1456586_x_at            | Mvp            | major vault protein                                                                      | 78388          | 731    | 1307   | 1146   | 1582    | 1.79            | 1.57            | 2.16             | 1.14            | 0.0005           |
| 1418930_at              | Cxcl10         | chemokine (C-X-C motif) ligand 10                                                        | 15945          | 32     | 201    | 364    | 1554    | 6.29            | 11.37           | 48.6             | 0.55            | 0.0003           |
| 1452348_s_at            | Ifi205         | interferon activated gene 205                                                            | 226695         | 352    | 972    | 564    | 1545    | 2.76            | 1.60            | 4.38             | 1.72            | 0.004            |
| 1419209_at              | Cxcl1          | chemokine (C-X-C motif) ligand 1                                                         | 14825          | 107    | 760    | 369    | 1530    | 7.11            | 3.45            | 14.33            | 2.06            | 0.004            |
| 1444242_at              | Slco2a1        | solute carrier organic anion transporter family, member 2a1                              | 24059          | 722    | 1213   | 974    | 1517    | 1.68            | 1.35            | 2.10             | 1.24            | 0.01             |
| 1427739_a_at            | Trp53          | transformation related protein 53                                                        | 22059          | 660    | 1086   | 1246   | 1499    | 1.64            | 1.89            | 2.27             | 0.87            | 0.0004           |
| 1422962_a_at            | Psmb8          | proteasome (prosome, macropain) subunit, beta type 8 (large multifunctional peptidase 7) | 16913          | 117    | 783    | 291    | 1419    | 6.71            | 2.49            | 12.17            | 2.69            | <0.0001          |
| 1457644_s_at            | Cxcl1          | chemokine (C-X-C motif) ligand 1                                                         | 14825          | 292    | 794    | 504    | 1303    | 2.72            | 1.73            | 4.46             | 1.58            | 0.006            |
| 1417244_a_at            | Irf7           | interferon regulatory factor 7                                                           | 54123          | 286    | 865    | 384    | 1283    | 3.03            | 1.35            | 4.49             | 2.25            | 0.004            |
| 1449591_at              | Casp4          | caspase 4, apoptosis-related cysteine peptidase                                          | 12363          | 269    | 1074   | 780    | 1271    | 4.00            | 2.91            | 4.73             | 1.38            | <0.0001          |

| Affymetrix<br>Probe set ID | Gene symbol | Gene name                                                                                      | Entrez<br>Gene<br>ID | Mean<br>C | Mean<br>T | Mean<br>L | Mean<br>TL | Fold<br>change<br>T/C | Fold<br>change<br>L/C | Fold<br>change<br>TL/C | Fold<br>change<br>T/L | p Value<br>of<br>ANOVA |
|----------------------------|-------------|------------------------------------------------------------------------------------------------|----------------------|-----------|-----------|-----------|------------|-----------------------|-----------------------|------------------------|-----------------------|------------------------|
| 1448881_at                 | Hp          | haptoglobin                                                                                    | 15439                | 85        | 1148      | 130       | 1212       | 13.56                 | 1.53                  | 14.32                  | 8.85                  | 0.003                  |
| 1449195_s_at               | Cxcl16      | chemokine (C-X-C motif) ligand 16                                                              | 66102                | 99        | 585       | 247       | 1206       | 5.91                  | 2.49                  | 12.19                  | 2.37                  | 0.0001                 |
| 1417141_at                 | Igtp        | interferon gamma induced GTPase                                                                | 16145                | 347       | 847       | 581       | 1144       | 2.44                  | 1.67                  | 3.30                   | 1.46                  | 0.003                  |
| 1424857_a_at               | Trim34      | tripartite motif-containing 34                                                                 | 94094                | 429       | 850       | 538       | 1119       | 1.98                  | 1.26                  | 2.61                   | 1.58                  | 0.01                   |
| 1448940_at                 | Trim21      | tripartite motif-containing 21                                                                 | 20821                | 456       | 819       | 617       | 1096       | 1.79                  | 1.35                  | 2.40                   | 1.33                  | 0.0006                 |
| 1452231_x_at               | Ifi205      | interferon activated gene 205                                                                  | 226695               | 184       | 656       | 317       | 1090       | 3.57                  | 1.73                  | 5.94                   | 2.07                  | 0.002                  |
| 1416016_at                 | Psmb9       | proteasome (prosome, macropain)<br>subunit, beta type 9 (large<br>multifunctional peptidase 2) | 16912                | 446       | 715       | 588       | 1074       | 1.61                  | 1.32                  | 2.41                   | 1.22                  | 0.0003                 |
| 1428660_s_at               | Tor3a       | torsin family 3, member A                                                                      | 30935                | 507       | 787       | 596       | 1039       | 1.55                  | 1.18                  | 2.05                   | 1.32                  | 0.001                  |
| 1422573_at                 | Ampd3       | adenosine monophosphate deaminase<br>3                                                         | 11717                | 299       | 624       | 511       | 1035       | 2.09                  | 1.71                  | 3.47                   | 1.22                  | 0.007                  |
| 1450403_at                 | Stat2       | signal transducer and activator of<br>transcription 2                                          | 20847                | 383       | 746       | 494       | 1024       | 1.95                  | 1.29                  | 2.67                   | 1.51                  | 0.001                  |
| 1453913_a_at               | Tap2        | transporter 2, ATP-binding cassette,<br>sub-family B (MDR/TAP)                                 | 21355                | 424       | 673       | 582       | 1000       | 1.59                  | 1.37                  | 2.36                   | 1.16                  | 0.0008                 |
| 1456890_at                 | Ddx58       | DEAD (Asp-Glu-Ala-Asp) box<br>polypeptide 58                                                   | 230073               | 299       | 693       | 496       | 978        | 2.32                  | 1.66                  | 3.27                   | 1.40                  | 0.0001                 |
| 1422782_s_at               | Tlr3        | toll-like receptor 3                                                                           | 142980               | 425       | 769       | 568       | 970        | 1.81                  | 1.34                  | 2.28                   | 1.35                  | 0.0008                 |
| 1420089_at                 | Nfkbia      | nuclear factor of kappa light<br>polypeptide gene enhancer in B-cells<br>inhibitor, alpha      | 18035                | 333       | 600       | 560       | 877        | 1.80                  | 1.68                  | 2.63                   | 1.07                  | 0.0008                 |
| 1438037_at                 | Herc5       | hect domain and RLD 5                                                                          | 67138                | 264       | 591       | 364       | 855        | 2.24                  | 1.38                  | 3.25                   | 1.62                  | 0.006                  |
| 1426278_at                 | Ifi27       | interferon, alpha-inducible protein 27                                                         | 76933                | 330       | 688       | 336       | 813        | 2.08                  | 1.02                  | 2.46                   | 2.05                  | 0.007                  |
| 1450534_x_at               | H2-K1       | histocompatibility 2, K1, K region                                                             | 14972                | 224       | 773       | 376       | 808        | 3.45                  | 1.68                  | 3.61                   | 2.06                  | 0.0004                 |
| 1415804_at                 | Cx3cl1      | chemokine (C-X3-C motif) ligand 1                                                              | 20312                | 215       | 325       | 421       | 805        | 1.52                  | 1.96                  | 3.75                   | 0.77                  | 0.03                   |
| 1425719_a_at               | Nmi         | N-myc (and STAT) interactor                                                                    | 64685                | 282       | 549       | 390       | 788        | 1.94                  | 1.38                  | 2.79                   | 1.41                  | 0.002                  |
| 1431095_a_at               | Herc5       | hect domain and RLD 5                                                                          | 67138                | 374       | 548       | 395       | 762        | 1.47                  | 1.06                  | 2.04                   | 1.39                  | 0.03                   |
| 1426906_at                 | Ifi205      | interferon activated gene 205                                                                  | 226695               | 120       | 482       | 223       | 748        | 4.02                  | 1.86                  | 6.23                   | 2.16                  | 0.004                  |
| 1427091_at                 | Znfx1       | zinc finger, NFX1-type containing 1                                                            | 98999                | 367       | 593       | 463       | 740        | 1.61                  | 1.26                  | 2.01                   | 1.28                  | 0.001                  |
| 1450672_a_at               | Trex1       | three prime repair exonuclease 1                                                               | 22040                | 288       | 454       | 430       | 702        | 1.58                  | 1.49                  | 2.44                   | 1.06                  | 0.003                  |
| 1426324_at                 | H2-K1       | histocompatibility 2, K1, K region                                                             | 14972                | 97        | 494       | 291       | 694        | 5.11                  | 3.01                  | 7.18                   | 1.70                  | 0.003                  |
| 1421911_at                 | Stat2       | signal transducer and activator of<br>transcription 2                                          | 20847                | 250       | 472       | 304       | 653        | 1.89                  | 1.22                  | 2.61                   | 1.56                  | 0.002                  |

| Affymetrix Probe set ID | Gene symbol | Gene name                                                                                             | Entrez Gene ID | Mean C | Mean T | Mean L | Mean TL | Fold change T/C | Fold change L/C | Fold change TL/C | Fold change T/L | p Value of ANOVA |
|-------------------------|-------------|-------------------------------------------------------------------------------------------------------|----------------|--------|--------|--------|---------|-----------------|-----------------|------------------|-----------------|------------------|
| 1450696_at              | Psmb9       | proteasome (prosome, macropain) subunit, beta type 9 (large multifunctional peptidase 2)              | 16912          | 31     | 270    | 173    | 637     | 8.83            | 5.65            | 20.80            | 1.56            | 0.0003           |
| 1452178_at              | Plec1       | plectin 1                                                                                             | 18810          | 230    | 476    | 288    | 589     | 2.07            | 1.25            | 2.56             | 1.65            | 0.0004           |
| 1417314_at              | Cfb         | complement factor B                                                                                   | 14962          | 132    | 424    | 134    | 565     | 3.20            | 1.01            | 4.27             | 3.17            | 0.01             |
| 1420499_at              | Gch1        | GTP cyclohydrolase 1                                                                                  | 14528          | 175    | 554    | 224    | 563     | 3.16            | 1.28            | 3.21             | 2.47            | 0.01             |
| 1424518_at              | Apol9a      | apolipoprotein L 9a                                                                                   | 223672         | 130    | 443    | 160    | 563     | 3.41            | 1.23            | 4.33             | 2.76            | 0.02             |
| 1450829_at              | Tnfaip3     | tumor necrosis factor, alpha-induced protein 3                                                        | 21929          | 139    | 272    | 219    | 556     | 1.95            | 1.57            | 4.00             | 1.24            | 0.0001           |
| 1427165_at              | Il13ra1     | interleukin 13 receptor, alpha 1                                                                      | 16164          | 204    | 383    | 301    | 550     | 1.87            | 1.47            | 2.69             | 1.27            | 0.0002           |
| 1418099_at              | Tnfrsf1b    | tumor necrosis factor receptor superfamily, member 1b                                                 | 21938          | 240    | 307    | 361    | 547     | 1.28            | 1.51            | 2.28             | 0.85            | 0.02             |
| 1454783_at              | Il13ra1     | interleukin 13 receptor, alpha 1                                                                      | 16164          | 151    | 349    | 261    | 535     | 2.31            | 1.73            | 3.54             | 1.34            | 0.0003           |
| 1451775_s_at            | Il13ra1     | interleukin 13 receptor, alpha 1                                                                      | 16164          | 207    | 376    | 279    | 532     | 1.81            | 1.35            | 2.57             | 1.34            | 0.0002           |
| 1439825_at              | Dtx3l       | deltex 3-like (Drosophila)                                                                            | 209200         | 181    | 407    | 289    | 506     | 2.25            | 1.60            | 2.80             | 1.40            | 0.0002           |
| 1451426_at              | Dhx58       | DEXH (Asp-Glu-X-His) box polypeptide 58                                                               | 80861          | 38     | 300    | 117    | 444     | 7.86            | 3.07            | 11.63            | 2.56            | 0.02             |
| 1417470_at              | Apobec3     | apolipoprotein B editing complex 3                                                                    | 80287          | 175    | 282    | 259    | 427     | 1.61            | 1.48            | 2.44             | 1.09            | 0.008            |
| 1434322_at              | Micall2     | MICAL-like 2                                                                                          | 231830         | 161    | 319    | 344    | 422     | 1.98            | 2.13            | 2.62             | 0.93            | 0.01             |
| 1429692_s_at            | Gch1        | GTP cyclohydrolase 1                                                                                  | 14528          | 177    | 423    | 209    | 416     | 2.38            | 1.18            | 2.35             | 2.03            | 0.008            |
| 1432478_a_at            | Rnf19b      | ring finger protein 19B                                                                               | 75234          | 202    | 210    | 284    | 404     | 1.04            | 1.40            | 2.00             | 0.74            | 0.007            |
| 1426063_a_at            | Gem         | GTP binding protein (gene overexpressed in skeletal muscle)                                           | 14579          | 60     | 117    | 124    | 385     | 1.94            | 2.05            | 6.37             | 0.95            | 0.02             |
| 1425519_a_at            | Cd74        | CD74 antigen (invariant polypeptide of major histocompatibility complex, class II antigen-associated) | 16149          | 129    | 259    | 152    | 350     | 2.01            | 1.18            | 2.72             | 1.70            | 0.002            |
| 1432026_a_at            | Herc5       | hect domain and RLD 5                                                                                 | 67138          | 108    | 226    | 120    | 345     | 2.10            | 1.12            | 3.20             | 1.88            | 0.003            |
| 1450484_a_at            | Cmpk2       | cytidine monophosphate (UMP-CMP) kinase 2, mitochondrial                                              | 22169          | 88     | 165    | 114    | 342     | 1.88            | 1.30            | 3.90             | 1.45            | 0.04             |
| 1436778_at              | Cybb        | cytochrome b-245, beta polypeptide                                                                    | 13058          | 115    | 246    | 131    | 341     | 2.14            | 1.14            | 2.97             | 1.88            | 0.004            |
| 1453757_at              | Herc5       | hect domain and RLD 5                                                                                 | 67138          | 99     | 200    | 129    | 330     | 2.01            | 1.29            | 3.32             | 1.56            | 0.002            |
| 1451821_a_at            | Sp100       | nuclear antigen Sp100                                                                                 | 20684          | 66     | 186    | 81     | 307     | 2.83            | 1.23            | 4.66             | 2.29            | 0.001            |
| 1448775_at              | Ifi203      | interferon activated gene 203                                                                         | 15950          | 67     | 179    | 121    | 291     | 2.67            | 1.81            | 4.34             | 1.48            | 0.009            |
| 1418133_at              | Bcl3        | B-cell leukemia/lymphoma 3                                                                            | 12051          | 21     | 211    | 142    | 275     | 10.20           | 6.90            | 13.34            | 1.48            | 0.002            |
| 1427164_at              | Il13ra1     | interleukin 13 receptor, alpha 1                                                                      | 16164          | 65     | 163    | 124    | 271     | 2.51            | 1.91            | 4.16             | 1.31            | 0.003            |
| 1437932_a_at            | Cldn1       | claudin 1                                                                                             | 12737          | 41     | 42     | 100    | 269     | 1.03            | 2.43            | 6.56             | 0.42            | 0.03             |

| <b>Affymetrix<br/>Probe set ID</b> | <b>Gene symbol</b> | <b>Gene name</b>                     | <b>Entrez<br/>Gene<br/>ID</b> | <b>Mean<br/>C</b> | <b>Mean<br/>T</b> | <b>Mean<br/>L</b> | <b>Mean<br/>TL</b> | <b>Fold<br/>change<br/>T/C</b> | <b>Fold<br/>change<br/>L/C</b> | <b>Fold<br/>change<br/>TL/C</b> | <b>Fold<br/>change<br/>T/L</b> | <b>p Value<br/>of<br/>ANOVA</b> |
|------------------------------------|--------------------|--------------------------------------|-------------------------------|-------------------|-------------------|-------------------|--------------------|--------------------------------|--------------------------------|---------------------------------|--------------------------------|---------------------------------|
| 1422562_at                         | Rrad               | Ras-related associated with diabetes | 56437                         | 26                | 125               | 239               | 260                | 4.73                           | 9.07                           | 9.86                            | 0.52                           | 0.008                           |



**Table SIII.d1. Immune response (GO:0006955).**

| Affymetrix<br>Probe set ID | Gene symbol | Gene name                                                                                | Entrez<br>Gene<br>ID | Mean<br>C | Mean<br>T | Mean<br>L | Mean<br>TL | Fold<br>change<br>T/C | Fold<br>change<br>L/C | Fold<br>change<br>TL/C | Fold<br>change<br>T/L | p Value<br>of<br>ANOVA |
|----------------------------|-------------|------------------------------------------------------------------------------------------|----------------------|-----------|-----------|-----------|------------|-----------------------|-----------------------|------------------------|-----------------------|------------------------|
| 1425336_x_at               | H2-K1       | histocompatibility 2, K1, K region                                                       | 14972                | 2371      | 9605      | 4787      | 11557      | 4.05                  | 2.02                  | 4.87                   | 2.01                  | <0.0001                |
| 1425545_x_at               | H2-L        | histocompatibility 2, D region                                                           | 14980                | 2172      | 6795      | 3180      | 8778       | 3.13                  | 1.46                  | 4.04                   | 2.14                  | <0.0001                |
| 1451784_x_at               | H2-D1       | histocompatibility 2, D region locus 1                                                   | 14964                | 1874      | 6157      | 2927      | 8183       | 3.29                  | 1.56                  | 4.37                   | 2.10                  | <0.0001                |
| 1423954_at                 | C3          | complement component 3                                                                   | 12266                | 500       | 4353      | 2107      | 7194       | 8.70                  | 4.21                  | 14.38                  | 2.07                  | 0.02                   |
| 1420380_at                 | Ccl2        | chemokine (C-C motif) ligand 2                                                           | 20296                | 111       | 2695      | 680       | 6319       | 24.35                 | 6.14                  | 57.10                  | 3.96                  | 0.0008                 |
| 1418126_at                 | Ccl5        | chemokine (C-C motif) ligand 5                                                           | 20304                | 13        | 1460      | 257       | 5280       | 114.57                | 20.15                 | 414.30                 | 5.69                  | <0.0001                |
| 1449556_at                 | H2-T23      | histocompatibility 2, T region locus 23                                                  | 15040                | 1254      | 3683      | 1665      | 5016       | 2.94                  | 1.33                  | 4.00                   | 2.21                  | 0.0002                 |
| 1418825_at                 | Irgm1       | immunity-related GTPase family M member 1                                                | 15944                | 2177      | 4176      | 2663      | 4619       | 1.92                  | 1.22                  | 2.12                   | 1.57                  | 0.03                   |
| 1424067_at                 | Icam1       | intercellular adhesion molecule 1                                                        | 15894                | 401       | 1742      | 1455      | 4417       | 4.35                  | 3.63                  | 11.03                  | 1.20                  | 0.0008                 |
| 1435906_x_at               | Gbp2        | guanylate binding protein 2                                                              | 14469                | 291       | 2526      | 660       | 4228       | 8.68                  | 2.27                  | 14.53                  | 3.82                  | 0.0002                 |
| 1436562_at                 | Ddx58       | DEAD (Asp-Glu-Ala-Asp) box polypeptide 58                                                | 230073               | 1245      | 2520      | 2170      | 4150       | 2.02                  | 1.74                  | 3.33                   | 1.16                  | 0.0004                 |
| 1449009_at                 | Tgtp        | T-cell specific GTPase                                                                   | 21822                | 345       | 1748      | 602       | 3794       | 5.06                  | 1.74                  | 10.99                  | 2.90                  | 0.0006                 |
| 1417936_at                 | Ccl9        | chemokine (C-C motif) ligand 9                                                           | 20308                | 866       | 1164      | 1914      | 3403       | 1.34                  | 2.21                  | 3.93                   | 0.61                  | 0.0009                 |
| 1418392_a_at               | Gbp3        | guanylate binding protein 3                                                              | 55932                | 268       | 1594      | 533       | 3340       | 5.95                  | 1.99                  | 12.46                  | 2.99                  | 0.0006                 |
| 1415803_at                 | Cx3cl1      | chemokine (C-X3-C motif) ligand 1                                                        | 20312                | 621       | 1128      | 1461      | 2593       | 1.82                  | 2.35                  | 4.18                   | 0.77                  | 0.004                  |
| 1441855_x_at               | Cxcl1       | chemokine (C-X-C motif) ligand 1                                                         | 14825                | 1015      | 1759      | 1305      | 2341       | 1.73                  | 1.29                  | 2.31                   | 1.35                  | 0.003                  |
| 1421228_at                 | Ccl7        | chemokine (C-C motif) ligand 7                                                           | 20306                | 22        | 899       | 246       | 2303       | 41.62                 | 11.39                 | 106.61                 | 3.66                  | 0.0007                 |
| 1426276_at                 | Ifih1       | interferon induced with helicase C domain 1                                              | 71586                | 629       | 1582      | 876       | 2178       | 2.52                  | 1.39                  | 3.47                   | 1.81                  | 0.003                  |
| 1418718_at                 | Cxcl16      | chemokine (C-X-C motif) ligand 16                                                        | 66102                | 248       | 1055      | 507       | 1856       | 4.26                  | 2.05                  | 7.49                   | 2.08                  | <0.0001                |
| 1419132_at                 | Tlr2        | toll-like receptor 2                                                                     | 24088                | 373       | 1305      | 790       | 1825       | 3.50                  | 2.12                  | 4.89                   | 1.65                  | <0.0001                |
| 1418930_at                 | Cxcl10      | chemokine (C-X-C motif) ligand 10                                                        | 15945                | 32        | 201       | 364       | 1554       | 6.29                  | 11.37                 | 48.60                  | 0.55                  | 0.0003                 |
| 1427739_a_at               | Trp53       | transformation related protein 53                                                        | 22059                | 660       | 1086      | 1246      | 1499       | 1.64                  | 1.89                  | 2.27                   | 0.87                  | 0.0004                 |
| 1453196_a_at               | Oasl2       | 2'-5' oligoadenylate synthetase-like 2                                                   | 23962                | 84        | 692       | 247       | 1463       | 8.25                  | 2.95                  | 17.45                  | 2.80                  | 0.0005                 |
| 1422962_a_at               | Psmb8       | proteasome (prosome, macropain) subunit, beta type 8 (large multifunctional peptidase 7) | 16913                | 117       | 783       | 291       | 1419       | 6.71                  | 2.49                  | 12.17                  | 2.69                  | <0.0001                |
| 1417244_a_at               | Irf7        | interferon regulatory factor 7                                                           | 54123                | 286       | 865       | 384       | 1283       | 3.03                  | 1.35                  | 4.49                   | 2.25                  | 0.004                  |
| 1425902_a_at               | Nfkb2       | nuclear factor of kappa light polypeptide gene enhancer in B-cells 2, p49/p100           | 18034                | 160       | 539       | 958       | 1274       | 3.37                  | 5.99                  | 7.96                   | 0.56                  | 0.0009                 |

| Affymetrix<br>Probe set ID | Gene symbol | Gene name                                                                                                   | Entrez<br>Gene<br>ID | Mean<br>C | Mean<br>T | Mean<br>L | Mean<br>TL | Fold<br>change<br>T/C | Fold<br>change<br>L/C | Fold<br>change<br>TL/C | Fold<br>change<br>T/L | p Value<br>of<br>ANOVA |
|----------------------------|-------------|-------------------------------------------------------------------------------------------------------------|----------------------|-----------|-----------|-----------|------------|-----------------------|-----------------------|------------------------|-----------------------|------------------------|
| 1416016_at                 | Psmb9       | proteasome (prosome, macropain)<br>subunit, beta type 9 (large<br>multifunctional peptidase 2)              | 16912                | 446       | 715       | 588       | 1074       | 1.61                  | 1.32                  | 2.41                   | 1.22                  | 0.0003                 |
| 1453913_a_at               | Tap2        | transporter 2, ATP-binding cassette,<br>sub-family B (MDR/TAP)                                              | 21355                | 424       | 673       | 582       | 1000       | 1.59                  | 1.37                  | 2.36                   | 1.16                  | 0.0008                 |
| 1421358_at                 | H2-M3       | histocompatibility 2, M region locus 3                                                                      | 14991                | 440       | 771       | 582       | 971        | 1.75                  | 1.32                  | 2.21                   | 1.33                  | 0.0001                 |
| 1422782_s_at               | Tlr3        | toll-like receptor 3                                                                                        | 142980               | 425       | 769       | 568       | 970        | 1.81                  | 1.34                  | 2.28                   | 1.35                  | 0.0008                 |
| 1416942_at                 | Erap1       | endoplasmic reticulum<br>aminopeptidase 1                                                                   | 80898                | 443       | 693       | 423       | 897        | 1.57                  | 0.95                  | 2.03                   | 1.64                  | <0.0001                |
| 1417856_at                 | Relb        | avian reticuloendotheliosis viral (v-<br>rel) oncogene related B                                            | 19698                | 179       | 601       | 367       | 847        | 3.35                  | 2.05                  | 4.73                   | 1.64                  | 0.0003                 |
| 1449277_at                 | Ccl19       | chemokine (C-C motif) ligand 19                                                                             | 24047                | 71        | 186       | 191       | 816        | 2.63                  | 2.71                  | 11.55                  | 0.97                  | 0.009                  |
| 1417314_at                 | Cfb         | complement factor B                                                                                         | 14962                | 132       | 424       | 134       | 565        | 3.20                  | 1.01                  | 4.27                   | 3.17                  | 0.01                   |
| 1448859_at                 | Cxcl13      | chemokine (C-X-C motif) ligand 13                                                                           | 55985                | 156       | 245       | 189       | 507        | 1.57                  | 1.21                  | 3.25                   | 1.30                  | 0.01                   |
| 1451426_at                 | Dhx58       | DEXH (Asp-Glu-X-His) box<br>polypeptide 58                                                                  | 80861                | 38        | 300       | 117       | 444        | 7.86                  | 3.07                  | 11.63                  | 2.56                  | 0.02                   |
| 1424923_at                 | Serpina3g   | serine (or cysteine) peptidase<br>inhibitor, clade A, member 3G                                             | 20715                | 40        | 98        | 246       | 407        | 2.46                  | 6.20                  | 10.27                  | 0.40                  | 0.02                   |
| 1432478_a_at               | Rnf19b      | ring finger protein 19B                                                                                     | 75234                | 202       | 210       | 284       | 404        | 1.04                  | 1.40                  | 2.00                   | 0.74                  | 0.007                  |
| 1425519_a_at               | Cd74        | CD74 antigen (invariant polypeptide<br>of major histocompatibility complex,<br>class II antigen-associated) | 16149                | 129       | 259       | 152       | 350        | 2.01                  | 1.18                  | 2.72                   | 1.70                  | 0.002                  |
| 1418133_at                 | Bcl3        | B-cell leukemia/lymphoma 3                                                                                  | 12051                | 21        | 211       | 142       | 275        | 10.20                 | 6.90                  | 13.34                  | 1.48                  | 0.002                  |

**Table SIII.d2. Regulation of immune response (GO:0050776).**

| <b>Affymetrix<br/>Probe set ID</b> | <b>Gene symbol</b> | <b>Gene name</b>                       | <b>Entrez<br/>Gene<br/>ID</b> | <b>Mean<br/>C</b> | <b>Mean<br/>T</b> | <b>Mean<br/>L</b> | <b>Mean<br/>TL</b> | <b>Fold<br/>change<br/>T/C</b> | <b>Fold<br/>change<br/>L/C</b> | <b>Fold<br/>change<br/>TL/C</b> | <b>Fold<br/>change<br/>T/L</b> | <b>p Value<br/>of<br/>ANOVA</b> |
|------------------------------------|--------------------|----------------------------------------|-------------------------------|-------------------|-------------------|-------------------|--------------------|--------------------------------|--------------------------------|---------------------------------|--------------------------------|---------------------------------|
| 1423954_at                         | C3                 | complement component 3                 | 12266                         | 500               | 4353              | 2107              | 7194               | 8.70                           | 4.21                           | 14.38                           | 2.07                           | 0.02                            |
| 1419132_at                         | Tlr2               | toll-like receptor 2                   | 24088                         | 373               | 1305              | 790               | 1825               | 3.50                           | 2.12                           | 4.89                            | 1.65                           | <0.0001                         |
| 1421358_at                         | H2-M3              | histocompatibility 2, M region locus 3 | 14991                         | 440               | 771               | 582               | 971                | 1.75                           | 1.32                           | 2.21                            | 1.33                           | 0.0001                          |
| 1417314_at                         | Cfb                | complement factor B                    | 14962                         | 132               | 424               | 134               | 565                | 3.20                           | 1.01                           | 4.27                            | 3.17                           | 0.01                            |

**Table SIII.d3. Inflammatory response (GO:0006954)**

| Affymetrix<br>Probe set ID | Gene symbol | Gene name                                                | Entrez<br>Gene<br>ID | Mean<br>C | Mean<br>T | Mean<br>L | Mean<br>TL | Fold<br>change<br>T/C | Fold<br>change<br>L/C | Fold<br>change<br>TL/C | Fold<br>change<br>T/L | p Value<br>of<br>ANOVA |
|----------------------------|-------------|----------------------------------------------------------|----------------------|-----------|-----------|-----------|------------|-----------------------|-----------------------|------------------------|-----------------------|------------------------|
| 1423954_at                 | C3          | complement component 3                                   | 12266                | 500       | 4353      | 2107      | 7194       | 8.70                  | 4.21                  | 14.38                  | 2.07                  | 0.02                   |
| 1420380_at                 | Ccl2        | chemokine (C-C motif) ligand 2                           | 20296                | 111       | 2695      | 680       | 6319       | 24.35                 | 6.14                  | 57.10                  | 3.96                  | 0.0008                 |
| 1418126_at                 | Ccl5        | chemokine (C-C motif) ligand 5                           | 20304                | 13        | 1460      | 257       | 5280       | 114.57                | 20.15                 | 414.30                 | 5.69                  | <0.0001                |
| 1441855_x_at               | Cxcl1       | chemokine (C-X-C motif) ligand 1                         | 14825                | 1015      | 1759      | 1305      | 2341       | 1.73                  | 1.29                  | 2.31                   | 1.35                  | 0.003                  |
| 1421228_at                 | Ccl7        | chemokine (C-C motif) ligand 7                           | 20306                | 22        | 899       | 246       | 2303       | 41.62                 | 11.39                 | 106.61                 | 3.66                  | 0.0007                 |
| 1419132_at                 | Tlr2        | toll-like receptor 2                                     | 24088                | 373       | 1305      | 790       | 1825       | 3.50                  | 2.12                  | 4.89                   | 1.65                  | <0.0001                |
| 1418930_at                 | Cxcl10      | chemokine (C-X-C motif) ligand 10                        | 15945                | 32        | 201       | 364       | 1554       | 6.29                  | 11.37                 | 48.60                  | 0.55                  | 0.0003                 |
| 1450826_a_at               | Saa3        | serum amyloid A 3                                        | 20210                | 95        | 867       | 101       | 1015       | 9.11                  | 1.06                  | 10.66                  | 8.62                  | 0.008                  |
| 1422782_s_at               | Tlr3        | toll-like receptor 3                                     | 142980               | 425       | 769       | 568       | 970        | 1.81                  | 1.34                  | 2.28                   | 1.35                  | 0.0008                 |
| 1449277_at                 | Ccl19       | chemokine (C-C motif) ligand 19                          | 24047                | 71        | 186       | 191       | 816        | 2.63                  | 2.71                  | 11.55                  | 0.97                  | 0.009                  |
| 1417314_at                 | Cfb         | complement factor B                                      | 14962                | 132       | 424       | 134       | 565        | 3.20                  | 1.01                  | 4.27                   | 3.17                  | 0.01                   |
| 1418099_at                 | Tnfrsf1b    | tumor necrosis factor receptor<br>superfamily, member 1b | 21938                | 240       | 307       | 361       | 547        | 1.28                  | 1.51                  | 2.28                   | 0.85                  | 0.02                   |
| 1448859_at                 | Cxcl13      | chemokine (C-X-C motif) ligand 13                        | 55985                | 156       | 245       | 189       | 507        | 1.57                  | 1.21                  | 3.25                   | 1.30                  | 0.01                   |
| 1417346_at                 | Pycard      | PYD and CARD domain containing                           | 66824                | 183       | 234       | 250       | 387        | 1.28                  | 1.37                  | 2.11                   | 0.94                  | 0.03                   |

**Table SIII.d4. Chemotaxis (GO:0006935)**

| <b>Affymetrix<br/>Probe set ID</b> | <b>Gene symbol</b> | <b>Gene name</b>                  | <b>Entrez<br/>Gene<br/>ID</b> | <b>Mean<br/>C</b> | <b>Mean<br/>T</b> | <b>Mean<br/>L</b> | <b>Mean<br/>TL</b> | <b>Fold<br/>change<br/>T/C</b> | <b>Fold<br/>change<br/>L/C</b> | <b>Fold<br/>change<br/>TL/C</b> | <b>Fold<br/>change<br/>T/L</b> | <b>p Value<br/>of<br/>ANOVA</b> |
|------------------------------------|--------------------|-----------------------------------|-------------------------------|-------------------|-------------------|-------------------|--------------------|--------------------------------|--------------------------------|---------------------------------|--------------------------------|---------------------------------|
| 1420380_at                         | Ccl2               | chemokine (C-C motif) ligand 2    | 20296                         | 111               | 2695              | 680               | 6319               | 24.35                          | 6.14                           | 57.10                           | 3.96                           | 0.0008                          |
| 1418126_at                         | Ccl5               | chemokine (C-C motif) ligand 5    | 20304                         | 13                | 1460              | 257               | 5280               | 114.57                         | 20.15                          | 414.30                          | 5.69                           | <0.0001                         |
| 1417936_at                         | Ccl9               | chemokine (C-C motif) ligand 9    | 20308                         | 866               | 1164              | 1914              | 3403               | 1.34                           | 2.21                           | 3.93                            | 0.61                           | 0.0009                          |
| 1421228_at                         | Ccl7               | chemokine (C-C motif) ligand 7    | 20306                         | 22                | 899               | 246               | 2303               | 41.62                          | 11.39                          | 106.61                          | 3.66                           | 0.0007                          |
| 1418718_at                         | Cxcl16             | chemokine (C-X-C motif) ligand 16 | 66102                         | 248               | 1055              | 507               | 1856               | 4.26                           | 2.05                           | 7.49                            | 2.08                           | <0.0001                         |
| 1418930_at                         | Cxcl10             | chemokine (C-X-C motif) ligand 10 | 15945                         | 32                | 201               | 364               | 1554               | 6.29                           | 11.37                          | 48.60                           | 0.55                           | 0.0003                          |
| 1449277_at                         | Ccl19              | chemokine (C-C motif) ligand 19   | 24047                         | 71                | 186               | 191               | 816                | 2.63                           | 2.71                           | 11.55                           | 0.97                           | 0.009                           |
| 1448859_at                         | Cxcl13             | chemokine (C-X-C motif) ligand 13 | 55985                         | 156               | 245               | 189               | 507                | 1.57                           | 1.21                           | 3.25                            | 1.30                           | 0.01                            |

**Table SIII.d5. Regulation of developmental process (GO:0050793)**

| Affymetrix<br>Probe set ID | Gene symbol | Gene name                                                                                                   | Entrez<br>Gene<br>ID | Mean<br>C | Mean<br>T | Mean<br>L | Mean<br>TL | Fold<br>change<br>T/C | Fold<br>change<br>L/C | Fold<br>change<br>TL/C | Fold<br>change<br>T/L | p Value<br>of<br>ANOVA |
|----------------------------|-------------|-------------------------------------------------------------------------------------------------------------|----------------------|-----------|-----------|-----------|------------|-----------------------|-----------------------|------------------------|-----------------------|------------------------|
| 1420088_at                 | Nfkbia      | nuclear factor of kappa light<br>polypeptide gene enhancer in B-cells<br>inhibitor, alpha                   | 18035                | 6521      | 13866     | 13479     | 16284      | 2.13                  | 2.07                  | 2.50                   | 1.03                  | <0.0001                |
| 1448914_a_at               | Csf1        | colony stimulating factor 1<br>(macrophage)                                                                 | 12977                | 3862      | 5953      | 5180      | 8053       | 1.54                  | 1.34                  | 2.09                   | 1.15                  | 0.02                   |
| 1436562_at                 | Ddx58       | DEAD (Asp-Glu-Ala-Asp) box<br>polypeptide 58                                                                | 230073               | 1245      | 2520      | 2170      | 4150       | 2.02                  | 1.74                  | 3.33                   | 1.16                  | 0.0004                 |
| 1418854_at                 | Birc2       | baculoviral IAP repeat-containing 2                                                                         | 11797                | 1009      | 1519      | 2010      | 2825       | 1.51                  | 1.99                  | 2.80                   | 0.76                  | 0.005                  |
| 1418587_at                 | Traf3       | Tnf receptor-associated factor 3                                                                            | 22031                | 1203      | 2026      | 2211      | 2504       | 1.68                  | 1.84                  | 2.08                   | 0.92                  | 0.0001                 |
| 1426276_at                 | Ifih1       | interferon induced with helicase C<br>domain 1                                                              | 71586                | 629       | 1582      | 876       | 2178       | 2.52                  | 1.39                  | 3.47                   | 1.81                  | 0.003                  |
| 1421392_a_at               | Birc3       | baculoviral IAP repeat-containing 3                                                                         | 11796                | 417       | 869       | 923       | 2071       | 2.08                  | 2.21                  | 4.96                   | 0.94                  | 0.0005                 |
| 1427739_a_at               | Trp53       | transformation related protein 53                                                                           | 22059                | 660       | 1086      | 1246      | 1499       | 1.64                  | 1.89                  | 2.27                   | 0.87                  | 0.0004                 |
| 1417130_s_at               | Angptl4     | angiopoietin-like 4                                                                                         | 57875                | 404       | 1039      | 935       | 1402       | 2.57                  | 2.32                  | 3.47                   | 1.11                  | 0.02                   |
| 1449591_at                 | Casp4       | caspase 4, apoptosis-related cysteine<br>peptidase                                                          | 12363                | 269       | 1074      | 780       | 1271       | 4.00                  | 2.91                  | 4.73                   | 1.38                  | <0.0001                |
| 1415899_at                 | Junb        | Jun-B oncogene                                                                                              | 16477                | 340       | 743       | 680       | 1038       | 2.19                  | 2.00                  | 3.06                   | 1.09                  | 0.0001                 |
| 1421358_at                 | H2-M3       | histocompatibility 2, M region locus 3                                                                      | 14991                | 440       | 771       | 582       | 971        | 1.75                  | 1.32                  | 2.21                   | 1.33                  | 0.0001                 |
| 1416942_at                 | Erap1       | endoplasmic reticulum<br>aminopeptidase 1                                                                   | 80898                | 443       | 693       | 423       | 897        | 1.57                  | 0.95                  | 2.03                   | 1.64                  | <0.0001                |
| 1454974_at                 | Ntn1        | netrin 1                                                                                                    | 18208                | 254       | 572       | 433       | 828        | 2.25                  | 1.71                  | 3.26                   | 1.32                  | 0.008                  |
| 1421236_at                 | Ripk2       | receptor (TNFRSF)-interacting<br>serine-threonine kinase 2                                                  | 192656               | 384       | 634       | 508       | 780        | 1.65                  | 1.32                  | 2.03                   | 1.25                  | 0.04                   |
| 1416295_a_at               | Il2rg       | interleukin 2 receptor, gamma chain                                                                         | 16186                | 90        | 254       | 259       | 455        | 2.81                  | 2.87                  | 5.04                   | 0.98                  | 0.02                   |
| 1457270_at                 | Gas7        | growth arrest specific 7                                                                                    | 14457                | 131       | 228       | 248       | 414        | 1.73                  | 1.89                  | 3.15                   | 0.92                  | 0.004                  |
| 1417346_at                 | Pycard      | PYD and CARD domain containing                                                                              | 66824                | 183       | 234       | 250       | 387        | 1.28                  | 1.37                  | 2.11                   | 0.94                  | 0.03                   |
| 1425519_a_at               | Cd74        | CD74 antigen (invariant polypeptide<br>of major histocompatibility complex,<br>class II antigen-associated) | 16149                | 129       | 259       | 152       | 350        | 2.01                  | 1.18                  | 2.72                   | 1.70                  | 0.002                  |
| 1418133_at                 | Bcl3        | B-cell leukemia/lymphoma 3                                                                                  | 12051                | 21        | 211       | 142       | 275        | 10.20                 | 6.90                  | 13.34                  | 1.48                  | 0.002                  |

**Table SIII.d6. Immune system development (GO:0002520)**

| Affymetrix<br>Probe set ID | Gene symbol | Gene name                                                                                             | Entrez<br>Gene<br>ID | Mean<br>C | Mean<br>T | Mean<br>L | Mean<br>TL | Fold<br>change<br>T/C | Fold<br>change<br>L/C | Fold<br>change<br>TL/C | Fold<br>change<br>T/L | p Value<br>of<br>ANOVA |
|----------------------------|-------------|-------------------------------------------------------------------------------------------------------|----------------------|-----------|-----------|-----------|------------|-----------------------|-----------------------|------------------------|-----------------------|------------------------|
| 1420088_at                 | Nfkbia      | nuclear factor of kappa light polypeptide gene enhancer in B-cells inhibitor, alpha                   | 18035                | 6521      | 13866     | 13479     | 16284      | 2.13                  | 2.07                  | 2.50                   | 1.03                  | <0.0001                |
| 1448914_a_at               | Csf1        | colony stimulating factor 1 (macrophage)                                                              | 12977                | 3862      | 5953      | 5180      | 8053       | 1.54                  | 1.34                  | 2.09                   | 1.15                  | 0.02                   |
| 1448436_a_at               | Irf1        | interferon regulatory factor 1                                                                        | 16362                | 806       | 1295      | 1220      | 1777       | 1.61                  | 1.51                  | 2.20                   | 1.06                  | <0.0001                |
| 1427739_a_at               | Trp53       | transformation related protein 53                                                                     | 22059                | 660       | 1086      | 1246      | 1499       | 1.64                  | 1.89                  | 2.27                   | 0.87                  | 0.0004                 |
| 1425902_a_at               | Nfkb2       | nuclear factor of kappa light polypeptide gene enhancer in B-cells 2, p49/p100                        | 18034                | 160       | 539       | 958       | 1274       | 3.37                  | 5.99                  | 7.96                   | 0.56                  | 0.0009                 |
| 1417856_at                 | Relb        | avian reticuloendotheliosis viral (v-rel) oncogene related B                                          | 19698                | 179       | 601       | 367       | 847        | 3.35                  | 2.05                  | 4.73                   | 1.64                  | 0.0003                 |
| 1448859_at                 | Cxcl13      | chemokine (C-X-C motif) ligand 13                                                                     | 55985                | 156       | 245       | 189       | 507        | 1.57                  | 1.21                  | 3.25                   | 1.30                  | 0.01                   |
| 1416295_a_at               | Il2rg       | interleukin 2 receptor, gamma chain                                                                   | 16186                | 90        | 254       | 259       | 455        | 2.81                  | 2.87                  | 5.04                   | 0.98                  | 0.02                   |
| 1460407_at                 | Spib        | Spi-B transcription factor (Spi-1/PU.1 related)                                                       | 272382               | 85        | 98        | 132       | 377        | 1.15                  | 1.55                  | 4.43                   | 0.74                  | 0.05                   |
| 1425519_a_at               | Cd74        | CD74 antigen (invariant polypeptide of major histocompatibility complex, class II antigen-associated) | 16149                | 129       | 259       | 152       | 350        | 2.01                  | 1.18                  | 2.72                   | 1.70                  | 0.002                  |
| 1418133_at                 | Bcl3        | B-cell leukemia/lymphoma 3                                                                            | 12051                | 21        | 211       | 142       | 275        | 10.20                 | 6.90                  | 13.34                  | 1.48                  | 0.002                  |

**Table SIII.d7. Chemokine activity (GO:0008009)**

| Affymetrix<br>Probe set ID | Gene symbol | Gene name                         | Entrez<br>Gene<br>ID | Mean<br>C | Mean<br>T | Mean<br>L | Mean<br>TL | Fold<br>change<br>T/C | Fold<br>change<br>L/C | Fold<br>change<br>TL/C | Fold<br>change<br>T/L | p Value<br>of<br>ANOVA |
|----------------------------|-------------|-----------------------------------|----------------------|-----------|-----------|-----------|------------|-----------------------|-----------------------|------------------------|-----------------------|------------------------|
| 1420380_at                 | Ccl2        | chemokine (C-C motif) ligand 2    | 20296                | 111       | 2695      | 680       | 6319       | 24.35                 | 6.14                  | 57.10                  | 3.96                  | 0.0008                 |
| 1418126_at                 | Ccl5        | chemokine (C-C motif) ligand 5    | 20304                | 13        | 1460      | 257       | 5280       | 114.57                | 20.15                 | 414.30                 | 5.69                  | <0.0001                |
| 1417936_at                 | Ccl9        | chemokine (C-C motif) ligand 9    | 20308                | 866       | 1164      | 1914      | 3403       | 1.34                  | 2.21                  | 3.93                   | 0.61                  | 0.0009                 |
| 1415803_at                 | Cx3cl1      | chemokine (C-X3-C motif) ligand 1 | 20312                | 621       | 1128      | 1461      | 2593       | 1.82                  | 2.35                  | 4.18                   | 0.77                  | 0.004                  |
| 1441855_x_at               | Cxcl1       | chemokine (C-X-C motif) ligand 1  | 14825                | 1015      | 1759      | 1305      | 2341       | 1.73                  | 1.29                  | 2.31                   | 1.35                  | 0.003                  |
| 1421228_at                 | Ccl7        | chemokine (C-C motif) ligand 7    | 20306                | 22        | 899       | 246       | 2303       | 41.62                 | 11.39                 | 106.61                 | 3.66                  | 0.0007                 |
| 1418718_at                 | Cxcl16      | chemokine (C-X-C motif) ligand 16 | 66102                | 248       | 1055      | 507       | 1856       | 4.26                  | 2.05                  | 7.49                   | 2.08                  | <0.0001                |
| 1418930_at                 | Cxcl10      | chemokine (C-X-C motif) ligand 10 | 15945                | 32        | 201       | 364       | 1554       | 6.29                  | 11.37                 | 48.60                  | 0.55                  | 0.0003                 |
| 1449277_at                 | Ccl19       | chemokine (C-C motif) ligand 19   | 24047                | 71        | 186       | 191       | 816        | 2.63                  | 2.71                  | 11.55                  | 0.97                  | 0.009                  |
| 1448859_at                 | Cxcl13      | chemokine (C-X-C motif) ligand 13 | 55985                | 156       | 245       | 189       | 507        | 1.57                  | 1.21                  | 3.25                   | 1.30                  | 0.01                   |



**Table SIII.d8. Cell adhesion (GO:0007155)**

| <b>Affymetrix<br/>Probe set ID</b> | <b>Gene symbol</b> | <b>Gene name</b>                            | <b>Entrez<br/>Gene<br/>ID</b> | <b>Mean<br/>C</b> | <b>Mean<br/>T</b> | <b>Mean<br/>L</b> | <b>Mean<br/>TL</b> | <b>Fold<br/>change<br/>T/C</b> | <b>Fold<br/>change<br/>L/C</b> | <b>Fold<br/>change<br/>TL/C</b> | <b>Fold<br/>change<br/>T/L</b> | <b>p Value<br/>of<br/>ANOVA</b> |
|------------------------------------|--------------------|---------------------------------------------|-------------------------------|-------------------|-------------------|-------------------|--------------------|--------------------------------|--------------------------------|---------------------------------|--------------------------------|---------------------------------|
| 1448162_at                         | Vcam1              | vascular cell adhesion molecule 1           | 22329                         | 1841              | 7170              | 4474              | 10628              | 3.89                           | 2.43                           | 5.77                            | 1.60                           | <0.0001                         |
| 1448914_a_at                       | Csf1               | colony stimulating factor 1<br>(macrophage) | 12977                         | 3862              | 5953              | 5180              | 8053               | 1.54                           | 1.34                           | 2.09                            | 1.15                           | 0.02                            |
| 1424067_at                         | Icam1              | intercellular adhesion molecule             | 15894                         | 401               | 1742              | 1455              | 4417               | 4.35                           | 3.63                           | 11.03                           | 1.20                           | 0.0008                          |
| 1415803_at                         | Cx3cl1             | chemokine (C-X3-C motif) ligand 1           | 20312                         | 621               | 1128              | 1461              | 2593               | 1.82                           | 2.35                           | 4.18                            | 0.77                           | 0.004                           |
| 1437932_a_at                       | Cldn1              | claudin 1                                   | 12737                         | 41                | 42                | 100               | 269                | 1.03                           | 2.43                           | 6.56                            | 0.42                           | 0.03                            |

**Table SIII.d9. Transcription factor activity (GO:0003700)**

| Affymetrix<br>Probe set ID | Gene symbol | Gene name                                                                             | Entrez<br>Gene<br>ID | Mean<br>C | Mean<br>T | Mean<br>L | Mean<br>TL | Fold<br>change<br>T/C | Fold<br>change<br>L/C | Fold<br>change<br>TL/C | Fold<br>change<br>T/L | p Value<br>of<br>ANOVA |
|----------------------------|-------------|---------------------------------------------------------------------------------------|----------------------|-----------|-----------|-----------|------------|-----------------------|-----------------------|------------------------|-----------------------|------------------------|
| 1450034_at                 | Stat1       | signal transducer and activator of transcription 1                                    | 20846                | 946       | 2819      | 1566      | 4274       | 2.98                  | 1.66                  | 4.52                   | 1.80                  | 0.0009                 |
| 1419155_a_at               | Sox4        | SRY-box containing gene 4                                                             | 20677                | 1019      | 1425      | 1967      | 2057       | 1.40                  | 1.93                  | 2.02                   | 0.72                  | 0.01                   |
| 1440831_at                 | Bach1       | BTB and CNC homology 1                                                                | 12013                | 921       | 1210      | 1391      | 2025       | 1.31                  | 1.51                  | 2.20                   | 0.87                  | 0.001                  |
| 1448436_a_at               | Irf1        | interferon regulatory factor 1                                                        | 16362                | 806       | 1295      | 1220      | 1777       | 1.61                  | 1.51                  | 2.20                   | 1.06                  | <0.0001                |
| 1427739_a_at               | Trp53       | transformation related protein 53                                                     | 22059                | 660       | 1086      | 1246      | 1499       | 1.64                  | 1.89                  | 2.27                   | 0.87                  | 0.0004                 |
| 1417244_a_at               | Irf7        | interferon regulatory factor 7                                                        | 54123                | 286       | 865       | 384       | 1283       | 3.03                  | 1.35                  | 4.49                   | 2.25                  | 0.004                  |
| 1425902_a_at               | Nfkb2       | nuclear factor of kappa light polypeptide gene enhancer in B-cells 2, p49/p100        | 18034                | 160       | 539       | 958       | 1274       | 3.37                  | 5.99                  | 7.96                   | 0.56                  | 0.0009                 |
| 1458299_s_at               | Nfkbie      | nuclear factor of kappa light polypeptide gene enhancer in B-cells inhibitor, epsilon | 18037                | 67        | 398       | 365       | 1156       | 5.96                  | 5.47                  | 17.31                  | 1.09                  | 0.003                  |
| 1415899_at                 | Junb        | Jun-B oncogene                                                                        | 16477                | 340       | 743       | 680       | 1038       | 2.19                  | 2.00                  | 3.06                   | 1.09                  | 0.0001                 |
| 1450403_at                 | Stat2       | signal transducer and activator of transcription 2                                    | 20847                | 383       | 746       | 494       | 1024       | 1.95                  | 1.29                  | 2.67                   | 1.51                  | 0.001                  |
| 1417856_at                 | Relb        | avian reticuloendotheliosis viral (v-rel) oncogene related B                          | 19698                | 179       | 601       | 367       | 847        | 3.35                  | 2.05                  | 4.73                   | 1.64                  | 0.0003                 |
| 1427091_at                 | Znfx1       | zinc finger, NFX1-type containing 1                                                   | 98999                | 367       | 593       | 463       | 740        | 1.61                  | 1.26                  | 2.01                   | 1.28                  | 0.001                  |
| 1417346_at                 | Pycard      | PYD and CARD domain containing                                                        | 66824                | 183       | 234       | 250       | 387        | 1.28                  | 1.37                  | 2.11                   | 0.94                  | 0.03                   |
| 1460407_at                 | Spib        | Spi-B transcription factor (Spi-1/PU.1 related)                                       | 272382               | 85        | 98        | 132       | 377        | 1.15                  | 1.55                  | 4.43                   | 0.74                  | 0.05                   |
| 1418133_at                 | Bcl3        | B-cell leukemia/lymphoma 3                                                            | 12051                | 21        | 211       | 142       | 275        | 10.20                 | 6.90                  | 13.34                  | 1.48                  | 0.002                  |

**Table SIII.d10. Antigen processing and presentation (GO:0019882)**

| Affymetrix<br>Probe set ID | Gene symbol | Gene name                                                                                             | Entrez<br>Gene<br>ID | Mean<br>C | Mean<br>T | Mean<br>L | Mean<br>TL | Fold<br>change<br>T/C | Fold<br>change<br>L/C | Fold<br>change<br>TL/C | Fold<br>change<br>T/L | p Value<br>of<br>ANOVA |
|----------------------------|-------------|-------------------------------------------------------------------------------------------------------|----------------------|-----------|-----------|-----------|------------|-----------------------|-----------------------|------------------------|-----------------------|------------------------|
| 1425336_x_at               | H2-K1       | histocompatibility 2, K1, K region                                                                    | 14972                | 2371      | 9605      | 4787      | 11557      | 4.05                  | 2.02                  | 4.87                   | 2.01                  | <0.0001                |
| 1425545_x_at               | H2-L        | histocompatibility 2, D region                                                                        | 14980                | 2172      | 6795      | 3180      | 8778       | 3.13                  | 1.46                  | 4.04                   | 2.14                  | <0.0001                |
| 1421812_at                 | Tapbp       | TAP binding protein                                                                                   | 21356                | 2751      | 6688      | 3917      | 8239       | 2.43                  | 1.42                  | 2.99                   | 1.71                  | <0.0001                |
| 1451784_x_at               | H2-D1       | histocompatibility 2, D region locus 1                                                                | 14964                | 1874      | 6157      | 2927      | 8183       | 3.29                  | 1.56                  | 4.37                   | 2.10                  | <0.0001                |
| 1449556_at                 | H2-T23      | histocompatibility 2, T region locus 23                                                               | 15040                | 1254      | 3683      | 1665      | 5016       | 2.94                  | 1.33                  | 4.00                   | 2.21                  | 0.0002                 |
| 1417189_at                 | Psme2       | proteasome (prosome, macropain) 28 subunit, beta                                                      | 19188                | 2076      | 3611      | 2568      | 4384       | 1.74                  | 1.24                  | 2.11                   | 1.41                  | 0.0001                 |
| 1422962_a_at               | Psm8        | proteasome (prosome, macropain) subunit, beta type 8 (large multifunctional peptidase 7)              | 16913                | 117       | 783       | 291       | 1419       | 6.71                  | 2.49                  | 12.17                  | 2.69                  | <0.0001                |
| 1417856_at                 | Relb        | avian reticuloendotheliosis viral (v-rel) oncogene related B                                          | 19698                | 179       | 601       | 367       | 847        | 3.35                  | 2.05                  | 4.73                   | 1.64                  | 0.0003                 |
| 1450696_at                 | Psm9        | proteasome (prosome, macropain) subunit, beta type 9 (large multifunctional peptidase 2)              | 16912                | 31        | 270       | 173       | 637        | 8.83                  | 5.65                  | 20.80                  | 1.56                  | 0.0003                 |
| 1451544_at                 | Tapbpl      | TAP binding protein-like                                                                              | 213233               | 218       | 325       | 287       | 496        | 1.49                  | 1.32                  | 2.28                   | 1.13                  | 0.002                  |
| 1425519_a_at               | Cd74        | CD74 antigen (invariant polypeptide of major histocompatibility complex, class II antigen-associated) | 16149                | 129       | 259       | 152       | 350        | 2.01                  | 1.18                  | 2.72                   | 1.70                  | 0.002                  |

**Table SIII.d11. Cytokine binding (GO:0019955)**

| <b>Affymetrix<br/>Probe set ID</b> | <b>Gene symbol</b> | <b>Gene name</b>                                         | <b>Entrez<br/>Gene<br/>ID</b> | <b>Mean<br/>C</b> | <b>Mean<br/>T</b> | <b>Mean<br/>L</b> | <b>Mean<br/>TL</b> | <b>Fold<br/>change<br/>T/C</b> | <b>Fold<br/>change<br/>L/C</b> | <b>Fold<br/>change<br/>TL/C</b> | <b>Fold<br/>change<br/>T/L</b> | <b>p Value<br/>of<br/>ANOVA</b> |
|------------------------------------|--------------------|----------------------------------------------------------|-------------------------------|-------------------|-------------------|-------------------|--------------------|--------------------------------|--------------------------------|---------------------------------|--------------------------------|---------------------------------|
| 1448167_at                         | Ifngr1             | interferon gamma receptor 1                              | 15979                         | 1036              | 1513              | 1841              | 2261               | 1.46                           | 1.78                           | 2.18                            | 0.82                           | 0.006                           |
| 1440169_x_at                       | Ifnar2             | interferon (alpha and beta) receptor 2                   | 15976                         | 375               | 779               | 595               | 1031               | 2.08                           | 1.59                           | 2.75                            | 1.31                           | 0.007                           |
| 1427165_at                         | Il13ra1            | interleukin 13 receptor, alpha 1                         | 16164                         | 204               | 383               | 301               | 550                | 1.87                           | 1.47                           | 2.69                            | 1.27                           | 0.0002                          |
| 1418099_at                         | Tnfrsf1b           | tumor necrosis factor receptor<br>superfamily, member 1b | 21938                         | 240               | 307               | 361               | 547                | 1.28                           | 1.51                           | 2.28                            | 0.85                           | 0.02                            |
| 1416295_a_at                       | Il2rg              | interleukin 2 receptor, gamma chain                      | 16186                         | 90                | 254               | 259               | 455                | 2.81                           | 2.87                           | 5.04                            | 0.98                           | 0.02                            |

**Table SIII.e. Down regulated genes.**

| Affymetrix<br>Probe set ID | Gene symbol | Gene name                                                                      | Entrez<br>Gene<br>ID | Mean<br>C | Mean<br>T | Mean<br>L | Mean<br>TL | Fold<br>change<br>T/C | Fold<br>change<br>L/C | Fold<br>change<br>TL/C | Fold<br>change<br>T/L | p Value<br>of<br>ANOVA |
|----------------------------|-------------|--------------------------------------------------------------------------------|----------------------|-----------|-----------|-----------|------------|-----------------------|-----------------------|------------------------|-----------------------|------------------------|
| 1418697_at                 | Inmt        | indolethylamine N-methyltransferase                                            | 21743                | 400       | 201       | 214       | 121        | 0.50                  | 0.54                  | 0.30                   | 0.94                  | 0.007                  |
| 1415904_at                 | Lpl         | lipoprotein lipase                                                             | 16956                | 1025      | 534       | 622       | 352        | 0.52                  | 0.61                  | 0.34                   | 0.86                  | 0.02                   |
| 1424605_at                 | Pcsk5       | proprotein convertase subtilisin/kexin<br>type 5                               | 18552                | 1258      | 815       | 795       | 433        | 0.65                  | 0.63                  | 0.34                   | 1.03                  | 0.02                   |
| 1438666_at                 | Ldlrad3     | low density lipoprotein receptor class<br>A domain containing 3                | 241576               | 2385      | 1187      | 1354      | 944        | 0.50                  | 0.57                  | 0.40                   | 0.88                  | 0.02                   |
| 1426082_a_at               | Slc16a4     | solute carrier family 16<br>(monocarboxylic acid transporters),<br>member 4    | 229699               | 1560      | 965       | 1069      | 720        | 0.62                  | 0.68                  | 0.46                   | 0.90                  | 0.01                   |
| 1423753_at                 | Bambi       | BMP and activin membrane-bound<br>inhibitor, homolog ( <i>Xenopus laevis</i> ) | 68010                | 682       | 578       | 556       | 322        | 0.85                  | 0.82                  | 0.47                   | 1.04                  | 0.001                  |
| 1432591_at                 | Pappa       | pregnancy-associated plasma protein<br>A                                       | 18491                | 4354      | 3081      | 3053      | 2104       | 0.71                  | 0.70                  | 0.48                   | 1.01                  | 0.02                   |
| 1434436_at                 | Morc4       | microorchidia 4                                                                | 75746                | 276       | 173       | 199       | 137        | 0.63                  | 0.72                  | 0.50                   | 0.87                  | 0.02                   |

**Table SIV. Determination of gene induction overlap between SMCs and aortic endothelial cells (Venn diagram Fig. SV).** Endothelial cells and SMCs were cultured as described in Methods and both cell types were stimulated with a combination of TNF/ $\alpha$ -LT $\beta$ R as described in Fig.1 for 24 h. (a) Gene induction only in endothelial cells (EC); (b) Gene induction only in aorta SMCs; (c) Gene induction in endothelial cells (EC, 24h) and in aorta SMCs.

**Table SIV.a. Gene induction only in endothelial cells (EC)**

| Affymetrix Probe set ID | Gene symbol    | Gene name                                                    | Entrez Gene ID | Mean SMC C | Mean SMC TL | Mean EC C | Mean EC TL | Fold change EC TL/C |
|-------------------------|----------------|--------------------------------------------------------------|----------------|------------|-------------|-----------|------------|---------------------|
| 1420940_x_at            | Rgs5           | regulator of G-protein signaling 5                           | 19737          | 4787       | 4946        | 392       | 2594       | 6.61                |
| 1420941_at              | Rgs5           | regulator of G-protein signaling 5                           | 19737          | 5630       | 5534        | 486       | 3093       | 6.36                |
| 1420942_s_at            | Rgs5           | regulator of G-protein signaling 5                           | 19737          | 6910       | 6280        | 636       | 3412       | 5.36                |
| 1417466_at              | Rgs5           | regulator of G-protein signaling 5                           | 19737          | 15777      | 16083       | 2160      | 10414      | 4.82                |
| 1418061_at              | Ltbp2          | latent transforming growth factor beta binding protein 2     | 16997          | 4630       | 7634        | 314       | 1490       | 4.75                |
| 1428034_a_at            | Tnfrsf9        | tumor necrosis factor receptor superfamily, member 9         | 21942          | 2          | 100         | 73        | 334        | 4.58                |
| 1440739_at              | Vegfc          | vascular endothelial growth factor C                         | 22341          | 178        | 349         | 665       | 2715       | 4.08                |
| 1442350_at              |                |                                                              |                | 1122       | 1096        | 144       | 528        | 3.67                |
| 1441750_x_at            | 4930447F24 Rik | RIKEN cDNA 4930447F24 gene                                   | 76873          | 198        | 144         | 203       | 713        | 3.51                |
| 1439766_x_at            | Vegfc          | vascular endothelial growth factor C                         | 22341          | 218        | 434         | 938       | 3132       | 3.34                |
| 1418762_at              | Cd55           | CD55 antigen                                                 | 13136          | 165        | 228         | 774       | 2553       | 3.30                |
| 1437173_at              | S1pr3          | sphingosine-1-phosphate receptor 3                           | 13610          | 29         | 114         | 222       | 683        | 3.08                |
| 1415894_at              | Enpp2          | ectonucleotide pyrophosphatase/phosphodiesterase 2           | 18606          | 646        | 1029        | 284       | 835        | 2.94                |
| 1424938_at              | Steap1         | six transmembrane epithelial antigen of the prostate 1       | 70358          | 139        | 150         | 513       | 1485       | 2.89                |
| 1429896_at              | 5830408B19 Rik | RIKEN cDNA 5830408B19 gene                                   | 74756          | 421        | 535         | 554       | 1502       | 2.71                |
| 1449368_at              | Dcn            | decorin                                                      | 13179          | 1443       | 1560        | 3685      | 9896       | 2.69                |
| 1419100_at              | Serpina3n      | serine (or cysteine) peptidase inhibitor, clade A, member 3N | 20716          | 316        | 490         | 465       | 1238       | 2.66                |
| 1425837_a_at            | Ccrn4l         | CCR4 carbon catabolite repression 4-like (S. cerevisiae)     | 12457          | 427        | 664         | 317       | 824        | 2.60                |
| 1460242_at              | Cd55           | CD55 antigen                                                 | 13136          | 184        | 255         | 1330      | 3435       | 2.58                |
| 1419684_at              | Ccl8           | chemokine (C-C motif) ligand 8                               | 20307          | 190        | 217         | 856       | 2195       | 2.56                |

| Affymetrix<br>Probe set ID | Gene symbol | Gene name                                                        | Entrez<br>Gene<br>ID | Mean<br>SMC<br>C | Mean<br>SMC<br>TL | Mean<br>EC<br>C | Mean<br>EC<br>TL | Fold change<br>EC<br>TL/C |
|----------------------------|-------------|------------------------------------------------------------------|----------------------|------------------|-------------------|-----------------|------------------|---------------------------|
| 1438055_at                 | Rarres1     | retinoic acid receptor responder (tazarotene induced) 1          | 109222               | 2071             | 3552              | 830             | 2084             | 2.51                      |
| 1421916_at                 | Pdgfra      | platelet derived growth factor receptor, alpha polypeptide       | 18595                | 422              | 736               | 633             | 1562             | 2.47                      |
| 1448421_s_at               | Aspn        | asporin                                                          | 66695                | 4014             | 2171              | 92              | 225              | 2.45                      |
| 1424208_at                 | Ptger4      | prostaglandin E receptor 4 (subtype EP4)                         | 19219                | 289              | 422               | 124             | 300              | 2.42                      |
| 1425829_a_at               | Steap4      | STEAP family member 4                                            | 117167               | 45               | 210               | 224             | 540              | 2.41                      |
| 1441749_at                 | 4930447F24  | RIKEN cDNA 4930447F24 gene                                       | 76873                | 185              | 246               | 223             | 537              | 2.41                      |
| 1450004_at                 | Rik         |                                                                  |                      |                  |                   |                 |                  |                           |
| 1450004_at                 | Tslp        | thymic stromal lymphopoietin                                     | 53603                | 56               | 85                | 135             | 323              | 2.39                      |
| 1443906_at                 | Cd55        | CD55 antigen                                                     | 13136                | 156              | 236               | 693             | 1588             | 2.29                      |
| 1417389_at                 | Gpc1        | glypican 1                                                       | 14733                | 568              | 746               | 424             | 959              | 2.26                      |
| 1440084_at                 |             |                                                                  |                      | 94               | 96                | 148             | 333              | 2.24                      |
| 1455840_at                 | Rapgef5     | Rap guanine nucleotide exchange factor (GEF) 5                   | 217944               | 48               | 73                | 227             | 497              | 2.19                      |
| 1416503_at                 | Lxn         | latexin                                                          | 17035                | 6125             | 11067             | 4389            | 9521             | 2.17                      |
| 1427076_at                 | Mpeg1       | macrophage expressed gene 1                                      | 17476                | 55               | 71                | 467             | 1003             | 2.15                      |
| 1432391_at                 | Ccdc21      | coiled-coil domain containing 21                                 | 70012                | 299              | 291               | 155             | 332              | 2.14                      |
| 1438946_at                 | Pdgfra      | platelet derived growth factor receptor, alpha polypeptide       | 18595                | 471              | 802               | 496             | 1046             | 2.11                      |
| 1451532_s_at               | Steap1      | six transmembrane epithelial antigen of the prostate 1           | 70358                | 516              | 544               | 998             | 2100             | 2.10                      |
| 1416299_at                 | Shcbp1      | Shc SH2-domain binding protein 1                                 | 20419                | 300              | 306               | 98              | 206              | 2.09                      |
| 1433909_at                 | Syt17       | synaptotagmin XVII                                               | 110058               | 344              | 683               | 559             | 1168             | 2.09                      |
| 1425357_a_at               | Grem1       | gremlin 1                                                        | 23892                | 329              | 328               | 1198            | 2488             | 2.08                      |
| 1455137_at                 | Rapgef5     | Rap guanine nucleotide exchange factor (GEF) 5                   | 217944               | 163              | 220               | 738             | 1514             | 2.05                      |
| 1433617_s_at               | B4galt5     | UDP-Gal:betaGlcNAc beta 1,4-galactosyltransferase, polypeptide 5 | 56336                | 379              | 749               | 873             | 1775             | 2.03                      |
| 1421075_s_at               | Cyp7b1      | cytochrome P450, family 7, subfamily b, polypeptide 1            | 13123                | 53               | 215               | 320             | 644              | 2.01                      |
| 1424808_at                 | Lama4       | laminin, alpha 4                                                 | 16775                | 66               | 62                | 168             | 336              | 2.00                      |
| 1438870_at                 | Fbn1        | fibrillin 1                                                      | 14118                | 1132             | 1122              | 452             | 905              | 2.00                      |

**Table SIV.b. Gene induction only in aorta SMCs.**

| Affymetrix<br>Probe set ID | Gene symbol | Gene name                                                                                      | Entrez<br>Gene<br>ID | Mean<br>SMC<br>C | Mean<br>SMC<br>TL | Mean<br>EC<br>C | Mean<br>EC<br>TL | Fold change<br>SMC<br>TL/C |
|----------------------------|-------------|------------------------------------------------------------------------------------------------|----------------------|------------------|-------------------|-----------------|------------------|----------------------------|
| 1447927_at                 | Mpa21       | macrophage activation 2 like                                                                   | 100702               | 10               | 802               | 48              | 64               | 77.61                      |
| 1418930_at                 | Cxcl10      | chemokine (C-X-C motif) ligand 10                                                              | 15945                | 31               | 1556              | 136             | 212              | 49.92                      |
| 1450696_at                 | Psmb9       | proteasome (prosome, macropain) subunit,<br>beta type 9 (large multifunctional peptidase<br>2) | 16912                | 30               | 641               | 95              | 152              | 21.54                      |
| 1429947_a_at               | Zbp1        | Z-DNA binding protein 1                                                                        | 58203                | 15               | 290               | 78              | 305              | 19.35                      |
| 1453196_a_at               | Oasl2       | 2'-5' oligoadenylate synthetase-like 2                                                         | 23962                | 82               | 1466              | 733             | 1012             | 17.83                      |
| 1438027_at                 |             |                                                                                                |                      | 14               | 200               | 40              | 48               | 14.75                      |
| 1419209_at                 | Cxcl1       | chemokine (C-X-C motif) ligand 1                                                               | 14825                | 105              | 1533              | 926             | 1337             | 14.58                      |
| 1418133_at                 | Bcl3        | B-cell leukemia/lymphoma 3                                                                     | 12051                | 20               | 276               | 314             | 332              | 13.70                      |
| 1436002_at                 | Scube3      | signal peptide, CUB domain, EGF-like 3                                                         | 268935               | 76               | 1043              | 46              | 118              | 13.70                      |
| 1437578_at                 | Clca2       | chloride channel calcium activated 2                                                           | 80797                | 49               | 620               | 40              | 154              | 12.74                      |
| 1418240_at                 | Gbp2        | guanylate binding protein 2                                                                    | 14469                | 293              | 3718              | 769             | 1495             | 12.67                      |
| 1418392_a_at               | Gbp3        | guanylate binding protein 3                                                                    | 55932                | 268              | 3335              | 664             | 1074             | 12.43                      |
| 1451426_at                 | Dhx58       | DEXH (Asp-Glu-X-His) box polypeptide 58                                                        | 80861                | 37               | 448               | 161             | 244              | 11.99                      |
| 1449277_at                 | Ccl19       | chemokine (C-C motif) ligand 19                                                                | 24047                | 69               | 820               | 19              | 20               | 11.88                      |
| 1453939_x_at               | 677168      | predicted gene, 677168                                                                         | 677168               | 29               | 335               | 112             | 189              | 11.52                      |
| 1451655_at                 | Slfn8       | schlafen 8                                                                                     | 276950               | 20               | 224               | 294             | 385              | 11.42                      |
| 1449009_at                 | Tgtp        | T-cell specific GTPase                                                                         | 21822                | 347              | 3788              | 1306            | 1887             | 10.90                      |
| 1424923_at                 | Serpina3g   | serine (or cysteine) peptidase inhibitor, clade<br>A, member 3G                                | 20715                | 39               | 409               | 95              | 530              | 10.55                      |
| 1423555_a_at               | Ifi44       | interferon-induced protein 44                                                                  | 99899                | 285              | 2917              | 785             | 1139             | 10.23                      |
| 1451261_s_at               | Stap2       | signal transducing adaptor family member 2                                                     | 106766               | 32               | 304               | 34              | 50               | 9.62                       |
| 1451777_at                 | Ddx60       | DEAD (Asp-Glu-Ala-Asp) box polypeptide<br>60                                                   | 234311               | 29               | 273               | 185             | 271              | 9.32                       |
| 1451314_a_at               | Vcam1       | vascular cell adhesion molecule 1                                                              | 22329                | 564              | 5068              | 7891            | 13083            | 8.99                       |
| 1453304_s_at               | Ly6e        | lymphocyte antigen 6 complex, locus E                                                          | 17069                | 564              | 4699              | 4387            | 7184             | 8.34                       |
| 1431008_at                 | 0610037M15  | RIKEN cDNA 0610037M15 gene                                                                     | 68395                | 75               | 629               | 109             | 179              | 8.33                       |
| 1418580_at                 | Rtp4        | receptor transporter protein 4                                                                 | 67775                | 728              | 5381              | 2386            | 2855             | 7.39                       |
| 1415989_at                 | Vcam1       | vascular cell adhesion molecule 1                                                              | 22329                | 843              | 6167              | 8182            | 12860            | 7.32                       |
| 1450783_at                 | Ifit1       | interferon-induced protein with<br>tetra-ricopeptide repeats 1                                 | 15957                | 539              | 3918              | 1744            | 2262             | 7.27                       |
| 1442019_at                 |             |                                                                                                |                      | 30               | 215               | 32              | 95               | 7.18                       |



| Affymetrix<br>Probe set ID | Gene symbol | Gene name                                                       | Entrez<br>Gene<br>ID | Mean<br>SMC<br>C | Mean<br>SMC<br>TL | Mean<br>EC<br>C | Mean<br>EC<br>TL | Fold change<br>SMC<br>TL/C |
|----------------------------|-------------|-----------------------------------------------------------------|----------------------|------------------|-------------------|-----------------|------------------|----------------------------|
| 1448632_at                 | Psmb10      | proteasome (prosome, macropain) subunit,<br>beta type 10        | 19171                | 337              | 2287              | 584             | 1339             | 6.80                       |
| 1417851_at                 | Cxcl13      | chemokine (C-X-C motif) ligand 13                               | 55985                | 49               | 325               | 56              | 54               | 6.64                       |
| 1419042_at                 | Iigp1       | interferon inducible GTPase 1                                   | 60440                | 262              | 1677              | 1083            | 1104             | 6.40                       |
| 1426906_at                 | Ifi205      | interferon activated gene 205                                   | 226695               | 118              | 752               | 1534            | 1802             | 6.35                       |
| 1451564_at                 | Parp14      | poly (ADP-ribose) polymerase family,<br>member 14               | 547253               | 163              | 1016              | 494             | 734              | 6.23                       |
| 1450424_a_at               | Il18bp      | interleukin 18 binding protein                                  | 16068                | 57               | 354               | 75              | 226              | 6.18                       |
| 1438676_at                 | Mpa21       | macrophage activation 2 like                                    | 100702               | 62               | 382               | 101             | 181              | 6.12                       |
| 1460259_s_at               | Clca2       | chloride channel calcium activated 2                            | 80797                | 564              | 3392              | 3458            | 3840             | 6.01                       |
| 1452231_x_at               | Ifi205      | interferon activated gene 205                                   | 226695               | 182              | 1094              | 2198            | 2631             | 6.00                       |
| 1448162_at                 | Vcam1       | vascular cell adhesion molecule 1                               | 22329                | 1842             | 10795             | 12399           | 14457            | 5.86                       |
| 1438855_x_at               | Tnfaip2     | tumor necrosis factor, alpha-induced protein<br>2               | 21928                | 140              | 804               | 879             | 1622             | 5.75                       |
| 1431591_s_at               | 677168      | predicted gene, 677168                                          | 677168               | 551              | 3152              | 990             | 1261             | 5.72                       |
| 1428942_at                 | Mt2         | metallothionein 2                                               | 17750                | 1718             | 9791              | 4995            | 9585             | 5.70                       |
| 1419043_a_at               | Iigp1       | interferon inducible GTPase 1                                   | 60440                | 486              | 2627              | 1800            | 1796             | 5.40                       |
| 1449204_at                 | Gjb5        | gap junction protein, beta 5                                    | 14622                | 50               | 265               | 60              | 145              | 5.34                       |
| 1424921_at                 | Brd4        | bromodomain containing 4                                        | 57261                | 760              | 3985              | 1972            | 3226             | 5.25                       |
| 1416295_a_at               | Il2rg       | interleukin 2 receptor, gamma chain                             | 16186                | 89               | 459               | 87              | 78               | 5.17                       |
| 1419132_at                 | Tlr2        | toll-like receptor 2                                            | 24088                | 376              | 1825              | 303             | 521              | 4.85                       |
| 1417856_at                 | Relb        | avian reticuloendotheliosis viral (v-rel)<br>oncogene related B | 19698                | 178              | 852               | 235             | 364              | 4.79                       |
| 1451821_a_at               | Sp100       | nuclear antigen Sp100                                           | 20684                | 64               | 308               | 174             | 193              | 4.79                       |
| 1449591_at                 | Casp4       | caspase 4, apoptosis-related cysteine<br>peptidase              | 12363                | 269              | 1274              | 1457            | 1715             | 4.73                       |
| 1434380_at                 | Gbp6        | guanylate binding protein 6                                     | 229900               | 266              | 1233              | 541             | 615              | 4.64                       |
| 1439831_at                 |             |                                                                 |                      | 82               | 373               | 232             | 293              | 4.53                       |
| 1417244_a_at               | Irf7        | interferon regulatory factor 7                                  | 54123                | 286              | 1285              | 597             | 866              | 4.49                       |
| 1450034_at                 | Stat1       | signal transducer and activator of<br>transcription 1           | 20846                | 951              | 4267              | 1386            | 1912             | 4.49                       |
| 1451537_at                 | Chi3l1      | chitinase 3-like 1                                              | 12654                | 61               | 273               | 72              | 70               | 4.48                       |
| 1449025_at                 | Ifit3       | interferon-induced protein with<br>tetratricopeptide repeats 3  | 15959                | 1361             | 6062              | 3492            | 3770             | 4.45                       |
| 1457644_s_at               | Cxcl1       | chemokine (C-X-C motif) ligand 1                                | 14825                | 294              | 1307              | 710             | 1200             | 4.45                       |
| 1448775_at                 | Ifi203      | interferon activated gene 203                                   | 15950                | 66               | 292               | 447             | 627              | 4.45                       |

| Affymetrix<br>Probe set ID | Gene symbol       | Gene name                                                              | Entrez<br>Gene<br>ID | Mean<br>SMC<br>C | Mean<br>SMC<br>TL | Mean<br>EC<br>C | Mean<br>EC<br>TL | Fold change<br>SMC<br>TL/C |
|----------------------------|-------------------|------------------------------------------------------------------------|----------------------|------------------|-------------------|-----------------|------------------|----------------------------|
| 1417292_at                 | Ifi47             | interferon gamma inducible protein 47                                  | 15953                | 875              | 3889              | 2008            | 2654             | 4.44                       |
| 1424518_at                 | Apo19a            | apolipoprotein L 9a                                                    | 223672               | 128              | 567               | 480             | 392              | 4.42                       |
| 1451784_x_at               | H2-D1             | histocompatibility 2, D region locus 1                                 | 14964                | 1875             | 8249              | 2863            | 5451             | 4.40                       |
| 1417793_at                 | Iigp2             | interferon inducible GTPase 2                                          | 54396                | 427              | 1867              | 898             | 1110             | 4.37                       |
| 1452348_s_at               | Ifi205            | interferon activated gene 205                                          | 226695               | 354              | 1547              | 2150            | 2776             | 4.37                       |
| 1417314_at                 | Cfb               | complement factor B                                                    | 14962                | 131              | 569               | 150             | 279              | 4.34                       |
| 1450033_a_at               | Stat1             | signal transducer and activator of<br>transcription 1                  | 20846                | 592              | 2543              | 1038            | 1435             | 4.30                       |
| 1452349_x_at               | Ifi205            | interferon activated gene 205                                          | 226695               | 655              | 2801              | 3333            | 4573             | 4.28                       |
| 1427164_at                 | Il13ra1           | interleukin 13 receptor, alpha 1                                       | 16164                | 64               | 271               | 323             | 556              | 4.27                       |
| 1415803_at                 | Cx3cl1            | chemokine (C-X3-C motif) ligand 1                                      | 20312                | 626              | 2591              | 1585            | 1694             | 4.14                       |
| 1426970_a_at               | Ube1l             | ubiquitin-activating enzyme E1-like                                    | 74153                | 78               | 320               | 240             | 259              | 4.11                       |
| 1425545_x_at               | H2-L              | histocompatibility 2, D region                                         | 14980                | 2173             | 8874              | 3094            | 5558             | 4.08                       |
| 1449556_at                 | H2-T23            | histocompatibility 2, T region locus 23                                | 15040                | 1257             | 5014              | 3870            | 6355             | 3.99                       |
| 1451860_a_at               | Trim30            | tripartite motif-containing 30                                         | 20128                | 275              | 1100              | 671             | 761              | 3.99                       |
| 1423091_a_at               | Gpm6b             | glycoprotein m6b                                                       | 14758                | 258              | 1031              | 998             | 1651             | 3.99                       |
| 1450484_a_at               | Cmpk2             | cytidine monophosphate (UMP-CMP) kinase<br>2, mitochondrial            | 22169                | 86               | 343               | 127             | 109              | 3.99                       |
| 1434015_at                 | Slc2a6            | solute carrier family 2 (facilitated glucose<br>transporter), member 6 | 227659               | 62               | 249               | 44              | 40               | 3.99                       |
| 1418191_at                 | Usp18             | ubiquitin specific peptidase 18                                        | 24110                | 461              | 1799              | 917             | 1034             | 3.90                       |
| 1417853_at                 | Clca1             | chloride channel calcium activated 1                                   | 12722                | 140              | 545               | 612             | 667              | 3.89                       |
| 1453228_at                 | Stx11             | syntaxin 11                                                            | 74732                | 364              | 1411              | 651             | 1259             | 3.87                       |
| 1457780_at                 | Stx11             | syntaxin 11                                                            | 74732                | 246              | 946               | 446             | 785              | 3.85                       |
| 1451006_at                 | Xdh               | xanthine dehydrogenase                                                 | 22436                | 75               | 289               | 1659            | 2011             | 3.85                       |
| 1453238_s_at               | 1200016E24<br>Rik | RIKEN cDNA 1200016E24 gene                                             | 319202               | 324              | 1233              | 6715            | 4261             | 3.81                       |
| 1415804_at                 | Cx3cl1            | chemokine (C-X3-C motif) ligand 1                                      | 20312                | 214              | 810               | 465             | 534              | 3.78                       |
| 1429159_at                 | Itih5             | inter-alpha (globulin) inhibitor H5                                    | 209378               | 76               | 286               | 1690            | 1301             | 3.75                       |
| 1420915_at                 | Stat1             | signal transducer and activator of<br>transcription 1                  | 20846                | 476              | 1777              | 707             | 803              | 3.73                       |
| 1454783_at                 | Il13ra1           | interleukin 13 receptor, alpha 1                                       | 16164                | 150              | 538               | 617             | 1006             | 3.60                       |
| 1425156_at                 | Gbp6              | guanylate binding protein 6                                            | 229900               | 57               | 202               | 124             | 181              | 3.54                       |
| 1435396_at                 | Stxbp6            | syntaxin binding protein 6 (amisyn)                                    | 217517               | 143              | 504               | 256             | 483              | 3.51                       |
| 1439965_at                 |                   |                                                                        |                      | 136              | 476               | 238             | 323              | 3.50                       |

| <b>Affymetrix<br/>Probe set ID</b> | <b>Gene symbol</b> | <b>Gene name</b>                                  | <b>Entrez<br/>Gene<br/>ID</b> | <b>Mean<br/>SMC<br/>C</b> | <b>Mean<br/>SMC<br/>TL</b> | <b>Mean<br/>EC<br/>C</b> | <b>Mean<br/>EC<br/>TL</b> | <b>Fold change<br/>SMC<br/>TL/C</b> |
|------------------------------------|--------------------|---------------------------------------------------|-------------------------------|---------------------------|----------------------------|--------------------------|---------------------------|-------------------------------------|
| 1436058_at                         | Rsad2              | radical S-adenosyl methionine domain containing 2 | 58185                         | 137                       | 477                        | 264                      | 198                       | 3.49                                |
| 1422573_at                         | Ampd3              | adenosine monophosphate deaminase 3               | 11717                         | 300                       | 1039                       | 759                      | 1104                      | 3.47                                |
| 1426276_at                         | Ifih1              | interferon induced with helicase C domain 1       | 71586                         | 633                       | 2177                       | 1057                     | 1115                      | 3.44                                |
| 1453757_at                         | Herc5              | hect domain and RLD 5                             | 67138                         | 98                        | 332                        | 130                      | 212                       | 3.39                                |
| 1448550_at                         | Lbp                | lipopolysaccharide binding protein                | 16803                         | 140                       | 471                        | 1113                     | 1761                      | 3.36                                |
| 1422557_s_at                       | Mt1                | metallothionein 1                                 | 17748                         | 2026                      | 6741                       | 6591                     | 10642                     | 3.33                                |
| 1436562_at                         | Ddx58              | DEAD (Asp-Glu-Ala-Asp) box polypeptide 58         | 230073                        | 1248                      | 4149                       | 1754                     | 2811                      | 3.32                                |
| 1443698_at                         | Xaf1               | XIAP associated factor 1                          | 327959                        | 801                       | 2662                       | 1189                     | 1529                      | 3.32                                |
| 1417961_a_at                       | Trim30             | tripartite motif-containing 30                    | 20128                         | 511                       | 1693                       | 1088                     | 1125                      | 3.31                                |
| 1425603_at                         | Tmem176a           | transmembrane protein 176A                        | 66058                         | 986                       | 3267                       | 704                      | 1139                      | 3.31                                |
| 1448859_at                         | Cxcl13             | chemokine (C-X-C motif) ligand 13                 | 55985                         | 154                       | 511                        | 213                      | 180                       | 3.31                                |
| 1417141_at                         | Igtp               | interferon gamma induced GTPase                   | 16145                         | 349                       | 1148                       | 612                      | 863                       | 3.29                                |
| 1454974_at                         | Ntn1               | netrin 1                                          | 18208                         | 254                       | 833                        | 1442                     | 930                       | 3.28                                |
| 1456890_at                         | Ddx58              | DEAD (Asp-Glu-Ala-Asp) box polypeptide 58         | 230073                        | 300                       | 982                        | 441                      | 562                       | 3.27                                |
| 1432026_a_at                       | Herc5              | hect domain and RLD 5                             | 67138                         | 106                       | 346                        | 161                      | 191                       | 3.27                                |
| 1438037_at                         | Herc5              | hect domain and RLD 5                             | 67138                         | 264                       | 861                        | 339                      | 457                       | 3.26                                |
| 1438868_at                         | Phf11              | PHD finger protein 11                             | 219131                        | 906                       | 2950                       | 1927                     | 1979                      | 3.25                                |
| 1420499_at                         | Gch1               | GTP cyclohydrolase 1                              | 14528                         | 174                       | 567                        | 175                      | 279                       | 3.25                                |
| 1457270_at                         | Gas7               | growth arrest specific 7                          | 14457                         | 130                       | 417                        | 111                      | 309                       | 3.21                                |
| 1442819_at                         | Rhbdl2             | rhomboid, veinlet-like 2 (Drosophila)             | 230726                        | 158                       | 505                        | 108                      | 216                       | 3.20                                |
| 1416897_at                         | Parp9              | poly (ADP-ribose) polymerase family, member 9     | 80285                         | 625                       | 1985                       | 1043                     | 1264                      | 3.18                                |
| 1449370_at                         | Sox4               | SRY-box containing gene 4                         | 20677                         | 274                       | 869                        | 579                      | 511                       | 3.18                                |
| 1439068_at                         | Erap1              | endoplasmic reticulum aminopeptidase 1            | 80898                         | 177                       | 562                        | 164                      | 257                       | 3.18                                |
| 1423909_at                         | Tmem176a           | transmembrane protein 176A                        | 66058                         | 1157                      | 3591                       | 976                      | 1629                      | 3.10                                |
| 1415899_at                         | Junb               | Jun-B oncogene                                    | 16477                         | 342                       | 1042                       | 415                      | 690                       | 3.04                                |
| 1436778_at                         | Cybb               | cytochrome b-245, beta polypeptide                | 13058                         | 113                       | 342                        | 80                       | 126                       | 3.03                                |
| 1441811_x_at                       | Tmem176a           | transmembrane protein 176A                        | 66058                         | 673                       | 2020                       | 433                      | 834                       | 3.00                                |
| 1455500_at                         | Rnf213             | ring finger protein 213                           | 629974                        | 1017                      | 3029                       | 1743                     | 2477                      | 2.98                                |
| 1417172_at                         | Ube2l6             | ubiquitin-conjugating enzyme E2L 6                | 56791                         | 128                       | 380                        | 249                      | 295                       | 2.97                                |
| 1456494_a_at                       | AI451617           | expressed sequence AI451617                       | 209387                        | 245                       | 725                        | 518                      | 614                       | 2.96                                |
| 1438498_at                         | Zmynd15            | zinc finger, MYND-type containing 15              | 574428                        | 62                        | 182                        | 132                      | 167                       | 2.95                                |
| 1429021_at                         | Epha4              | Eph receptor A4                                   | 13838                         | 159                       | 468                        | 92                       | 124                       | 2.94                                |

| Affymetrix<br>Probe set ID | Gene symbol       | Gene name                                                                                             | Entrez<br>Gene<br>ID | Mean<br>SMC<br>C | Mean<br>SMC<br>TL | Mean<br>EC<br>C | Mean<br>EC<br>TL | Fold change<br>SMC<br>TL/C |
|----------------------------|-------------------|-------------------------------------------------------------------------------------------------------|----------------------|------------------|-------------------|-----------------|------------------|----------------------------|
| 1429310_at                 | Flrt3             | fibronectin leucine rich transmembrane protein 3                                                      | 71436                | 117              | 344               | 137             | 293              | 2.93                       |
| 1435208_at                 | Dtx3l             | deltex 3-like (Drosophila)                                                                            | 209200               | 582              | 1700              | 1081            | 1375             | 2.92                       |
| 1436838_x_at               | Cotl1             | coactosin-like 1 (Dictyostelium)                                                                      | 72042                | 127              | 372               | 172             | 301              | 2.92                       |
| 1460125_at                 |                   |                                                                                                       |                      | 55               | 160               | 69              | 96               | 2.89                       |
| 1419156_at                 | Sox4              | SRY-box containing gene 4                                                                             | 20677                | 471              | 1350              | 1060            | 1013             | 2.87                       |
| 1443858_at                 | EG667823          | predicted gene, EG667823                                                                              | 667823               | 586              | 1672              | 758             | 897              | 2.85                       |
| 1439825_at                 | Dtx3l             | deltex 3-like (Drosophila)                                                                            | 209200               | 179              | 510               | 281             | 326              | 2.84                       |
| 1425719_a_at               | Nmi               | N-myc (and STAT) interactor                                                                           | 64685                | 283              | 793               | 308             | 339              | 2.80                       |
| 1417852_x_at               | Clca1             | chloride channel calcium activated 1                                                                  | 12722                | 396              | 1104              | 3346            | 3135             | 2.79                       |
| 1417300_at                 | Smpd13b           | sphingomyelin phosphodiesterase, acid-like 3B                                                         | 100340               | 146              | 405               | 259             | 326              | 2.77                       |
| 1425519_a_at               | Cd74              | CD74 antigen (invariant polypeptide of major histocompatibility complex, class II antigen-associated) | 16149                | 127              | 352               | 125             | 111              | 2.77                       |
| 1448380_at                 | Lgals3bp          | lectin, galactoside-binding, soluble, 3 binding protein                                               | 19039                | 2301             | 6330              | 5417            | 6679             | 2.75                       |
| 1440169_x_at               | Ifnar2            | interferon (alpha and beta) receptor 2                                                                | 15976                | 378              | 1036              | 968             | 1264             | 2.74                       |
| 1449484_at                 | Stc2              | stanniocalcin 2                                                                                       | 20856                | 123              | 336               | 615             | 874              | 2.74                       |
| 1427165_at                 | Il13ra1           | interleukin 13 receptor, alpha 1                                                                      | 16164                | 203              | 554               | 655             | 918              | 2.73                       |
| 1421009_at                 | Rsad2             | radical S-adenosyl methionine domain containing 2                                                     | 58185                | 73               | 199               | 114             | 137              | 2.71                       |
| 1435137_s_at               | 1200016E24<br>Rik | RIKEN cDNA 1200016E24 gene                                                                            | 319202               | 349              | 942               | 4217            | 2987             | 2.70                       |
| 1434046_at                 | AA467197          | expressed sequence AA467197                                                                           | 433470               | 65               | 176               | 234             | 434              | 2.70                       |
| 1426774_at                 | Parp12            | poly (ADP-ribose) polymerase family, member 12                                                        | 243771               | 804              | 2159              | 906             | 1020             | 2.69                       |
| 1436172_at                 | Samd9l            | sterile alpha motif domain containing 9-like                                                          | 209086               | 371              | 989               | 537             | 550              | 2.67                       |
| 1450403_at                 | Stat2             | signal transducer and activator of transcription 2                                                    | 20847                | 386              | 1028              | 715             | 798              | 2.66                       |
| 1433930_at                 | Hpse              | heparanase                                                                                            | 15442                | 172              | 456               | 2843            | 5557             | 2.66                       |
| 1434322_at                 | Micall2           | MICAL-like 2                                                                                          | 231830               | 160              | 425               | 184             | 300              | 2.66                       |
| 1420088_at                 | Nfkbia            | nuclear factor of kappa light polypeptide gene enhancer in B-cells inhibitor, alpha                   | 18035                | 6533             | 17222             | 8834            | 15077            | 2.64                       |
| 1424148_a_at               | Stap2             | signal transducing adaptor family member 2                                                            | 106766               | 131              | 345               | 102             | 153              | 2.64                       |

| <b>Affymetrix<br/>Probe set ID</b> | <b>Gene symbol</b> | <b>Gene name</b>                                                                         | <b>Entrez<br/>Gene<br/>ID</b> | <b>Mean<br/>SMC<br/>C</b> | <b>Mean<br/>SMC<br/>TL</b> | <b>Mean<br/>EC<br/>C</b> | <b>Mean<br/>EC<br/>TL</b> | <b>Fold change<br/>SMC<br/>TL/C</b> |
|------------------------------------|--------------------|------------------------------------------------------------------------------------------|-------------------------------|---------------------------|----------------------------|--------------------------|---------------------------|-------------------------------------|
| 1429184_at                         | 100042856          | predicted gene, 100042856                                                                | 100042856                     | 1574                      | 4145                       | 5238                     | 5681                      | 2.63                                |
| 1421911_at                         | Stat2              | signal transducer and activator of transcription 2                                       | 20847                         | 250                       | 658                        | 401                      | 450                       | 2.63                                |
| 1424857_a_at                       | Trim34             | tripartite motif-containing 34                                                           | 94094                         | 432                       | 1122                       | 628                      | 623                       | 2.60                                |
| 1451775_s_at                       | Il13ra1            | interleukin 13 receptor, alpha 1                                                         | 16164                         | 207                       | 537                        | 537                      | 697                       | 2.60                                |
| 1452178_at                         | Plec1              | plectin 1                                                                                | 18810                         | 230                       | 593                        | 431                      | 466                       | 2.58                                |
| 1435488_at                         | 1110019K23         | RIKEN cDNA 1110019K23 gene                                                               | 665563                        | 454                       | 1161                       | 520                      | 681                       | 2.56                                |
| 1418666_at                         | Ptx3               | pentraxin related gene                                                                   | 19288                         | 1521                      | 3861                       | 161                      | 198                       | 2.54                                |
| 1417470_at                         | Apobec3            | apolipoprotein B editing complex 3                                                       | 80287                         | 174                       | 431                        | 284                      | 420                       | 2.48                                |
| 1454592_at                         | 9430012M22         | RIKEN cDNA 9430012M22 gene                                                               | 77244                         | 65                        | 161                        | 88                       | 205                       | 2.48                                |
| 1426278_at                         | Ifi27              | interferon, alpha-inducible protein 27                                                   | 76933                         | 332                       | 817                        | 997                      | 854                       | 2.46                                |
| 1429570_at                         | Mlkl               | mixed lineage kinase domain-like                                                         | 74568                         | 356                       | 877                        | 570                      | 802                       | 2.46                                |
| 1430752_at                         | C330006D17         | RIKEN cDNA C330006D17 gene                                                               | 77616                         | 113                       | 278                        | 158                      | 307                       | 2.46                                |
| 1450672_a_at                       | Trex1              | three prime repair exonuclease 1                                                         | 22040                         | 289                       | 707                        | 445                      | 630                       | 2.45                                |
| 1455393_at                         | Cp                 | ceruloplasmin                                                                            | 12870                         | 206                       | 505                        | 6984                     | 8250                      | 2.45                                |
| 1446190_at                         | Dclk1              | doublecortin-like kinase 1                                                               | 13175                         | 168                       | 409                        | 279                      | 535                       | 2.44                                |
| 1419157_at                         | Sox4               | SRY-box containing gene 4                                                                | 20677                         | 584                       | 1422                       | 1151                     | 1253                      | 2.43                                |
| 1424777_at                         | Wdr21              | WD repeat domain 21                                                                      | 73828                         | 124                       | 301                        | 515                      | 423                       | 2.42                                |
| 1416016_at                         | Psmb9              | proteasome (prosome, macropain) subunit, beta type 9 (large multifunctional peptidase 2) | 16912                         | 449                       | 1077                       | 471                      | 587                       | 2.40                                |
| 1448940_at                         | Trim21             | tripartite motif-containing 21                                                           | 20821                         | 460                       | 1100                       | 783                      | 872                       | 2.39                                |
| 1429692_s_at                       | Gch1               | GTP cyclohydrolase 1                                                                     | 14528                         | 176                       | 420                        | 174                      | 246                       | 2.38                                |
| 1415972_at                         | Marcks             | myristoylated alanine rich protein kinase C substrate                                    | 17118                         | 1043                      | 2470                       | 4371                     | 5106                      | 2.37                                |
| 1429128_x_at                       | Nfkb2              | nuclear factor of kappa light polypeptide gene enhancer in B-cells 2, p49/p100           | 18034                         | 213                       | 504                        | 244                      | 465                       | 2.37                                |
| 1460603_at                         | Samd9l             | sterile alpha motif domain containing 9-like                                             | 209086                        | 1751                      | 4144                       | 2334                     | 2466                      | 2.37                                |
| 1439475_at                         | Zfp429             | zinc finger protein 429                                                                  | 72807                         | 137                       | 324                        | 189                      | 243                       | 2.37                                |
| 1453321_at                         | Fndc1              | fibronectin type III domain containing 1                                                 | 68655                         | 582                       | 1365                       | 55                       | 15                        | 2.35                                |
| 1456028_x_at                       | Marcks             | myristoylated alanine rich protein kinase C substrate                                    | 17118                         | 1041                      | 2449                       | 3602                     | 3432                      | 2.35                                |

| Affymetrix<br>Probe set ID | Gene symbol | Gene name                                                             | Entrez<br>Gene<br>ID | Mean<br>SMC<br>C | Mean<br>SMC<br>TL | Mean<br>EC<br>C | Mean<br>EC<br>TL | Fold change<br>SMC<br>TL/C |
|----------------------------|-------------|-----------------------------------------------------------------------|----------------------|------------------|-------------------|-----------------|------------------|----------------------------|
| 1426501_a_at               | Tifa        | TRAF-interacting protein with forkhead-associated domain              | 211550               | 155              | 363               | 628             | 876              | 2.35                       |
| 1453913_a_at               | Tap2        | transporter 2, ATP-binding cassette, sub-family B (MDR/TAP)           | 21355                | 427              | 1003              | 446             | 578              | 2.35                       |
| 1429727_at                 | Slc16a9     | solute carrier family 16 (monocarboxylic acid transporters), member 9 | 66859                | 125              | 293               | 86              | 243              | 2.34                       |
| 1428384_at                 | D4Bwg0951e  | DNA segment, Chr 4, Brigham & Women's Genetics 0951 expressed         | 52829                | 2224             | 5135              | 2178            | 3534             | 2.31                       |
| 1460197_a_at               | Steap4      | STEAP family member 4                                                 | 117167               | 263              | 608               | 1310            | 1794             | 2.31                       |
| 1438561_x_at               | Tmem180     | transmembrane protein 180                                             | 75146                | 119              | 275               | 103             | 150              | 2.31                       |
| 1418099_at                 | Tnfrsf1b    | tumor necrosis factor receptor superfamily, member 1b                 | 21938                | 240              | 551               | 1239            | 1671             | 2.30                       |
| 1451544_at                 | Tapbp1      | TAP binding protein-like                                              | 213233               | 217              | 500               | 209             | 254              | 2.30                       |
| 1441855_x_at               | Cxcl1       | chemokine (C-X-C motif) ligand 1                                      | 14825                | 1018             | 2340              | 1792            | 1890             | 2.30                       |
| 1455292_x_at               |             |                                                                       |                      | 205              | 470               | 356             | 460              | 2.30                       |
| 1459552_at                 |             |                                                                       |                      | 109              | 252               | 129             | 166              | 2.30                       |
| 1455724_at                 | Prrg1       | proline rich Gla (G-carboxyglutamic acid) 1                           | 546336               | 351              | 802               | 1207            | 1540             | 2.29                       |
| 1425942_a_at               | Gpm6b       | glycoprotein m6b                                                      | 14758                | 415              | 946               | 949             | 1458             | 2.28                       |
| 1417719_at                 | Sap30       | sin3 associated polypeptide                                           | 60406                | 228              | 516               | 985             | 969              | 2.27                       |
| 1422782_s_at               | Tlr3        | toll-like receptor 3                                                  | 142980               | 429              | 973               | 331             | 397              | 2.27                       |
| 1419358_at                 | Sorcs2      | sortilin-related VPS10 domain containing receptor 2                   | 81840                | 100              | 228               | 56              | 93               | 2.27                       |
| 1425749_at                 | Stxbp6      | syntaxin binding protein 6 (amisyn)                                   | 217517               | 144              | 325               | 170             | 324              | 2.27                       |
| 1426511_at                 | Susd2       | sushi domain containing 2                                             | 71733                | 231              | 524               | 92              | 152              | 2.27                       |
| 1438716_at                 | AI451617    | expressed sequence AI451617                                           | 209387               | 173              | 392               | 311             | 346              | 2.27                       |
| 1427739_a_at               | Trp53       | transformation related protein 53                                     | 22059                | 665              | 1500              | 823             | 1130             | 2.26                       |
| 1427689_a_at               | Tnip1       | TNFAIP3 interacting protein 1                                         | 57783                | 1493             | 3344              | 1569            | 2966             | 2.24                       |
| 1422742_at                 | Hivep1      | human immunodeficiency virus type I enhancer binding protein 1        | 110521               | 403              | 892               | 698             | 867              | 2.22                       |
| 1437226_x_at               | Marcks11    | MARCKS-like 1                                                         | 17357                | 723              | 1602              | 1744            | 1827             | 2.22                       |
| 1446894_at                 |             |                                                                       |                      | 418              | 928               | 131             | 202              | 2.22                       |
| 1421008_at                 | Rsad2       | radical S-adenosyl methionine domain containing 2                     | 58185                | 119              | 264               | 197             | 231              | 2.22                       |
| 1421217_a_at               | Lgals9      | lectin, galactose binding, soluble 9                                  | 16859                | 2062             | 4546              | 3647            | 3483             | 2.20                       |
| 1421358_at                 | H2-M3       | histocompatibility 2, M region locus 3                                | 14991                | 443              | 974               | 743             | 921              | 2.20                       |
| 1426452_a_at               | Rab30       | RAB30, member RAS oncogene family                                     | 75985                | 143              | 316               | 110             | 137              | 2.20                       |

| Affymetrix<br>Probe set ID | Gene symbol       | Gene name                                                    | Entrez<br>Gene<br>ID | Mean<br>SMC<br>C | Mean<br>SMC<br>TL | Mean<br>EC<br>C | Mean<br>EC<br>TL | Fold change<br>SMC<br>TL/C |
|----------------------------|-------------------|--------------------------------------------------------------|----------------------|------------------|-------------------|-----------------|------------------|----------------------------|
| 1460444_at                 | Arrb1             | arrestin, beta 1                                             | 109689               | 170              | 375               | 625             | 664              | 2.20                       |
| 1440831_at                 | Bach1             | BTB and CNC homology 1                                       | 12013                | 925              | 2028              | 1301            | 1817             | 2.19                       |
| 1448436_a_at               | Irf1              | interferon regulatory factor 1                               | 16362                | 811              | 1778              | 1213            | 1806             | 2.19                       |
| 1455966_s_at               | Nudt21            | nudix (nucleoside diphosphate linked moiety X)-type motif 21 | 68219                | 131              | 286               | 163             | 157              | 2.19                       |
| 1452483_a_at               | Cd44              | CD44 antigen                                                 | 12505                | 846              | 1845              | 782             | 1411             | 2.18                       |
| 1436183_at                 | 9830115L13<br>Rik | RIKEN cDNA 9830115L13 gene                                   | 319257               | 973              | 2121              | 1736            | 2249             | 2.18                       |
| 1417978_at                 | Eif4e3            | eukaryotic translation initiation factor 4E member 3         | 66892                | 241              | 525               | 379             | 363              | 2.17                       |
| 1427932_s_at               | 1200016E24<br>Rik | RIKEN cDNA 1200016E24 gene                                   | 319202               | 978              | 2118              | 6416            | 4622             | 2.17                       |
| 1448167_at                 | Ifngr1            | interferon gamma receptor 1                                  | 15979                | 1040             | 2258              | 1950            | 3226             | 2.17                       |
| 1421928_at                 | Epha4             | Eph receptor A4                                              | 13838                | 210              | 456               | 175             | 221              | 2.17                       |
| 1456586_x_at               | Mvp               | major vault protein                                          | 78388                | 736              | 1582              | 696             | 1295             | 2.15                       |
| 1437303_at                 | Il6st             | interleukin 6 signal transducer                              | 16195                | 494              | 1058              | 454             | 532              | 2.14                       |
| 1417346_at                 | Pycard            | PYD and CARD domain containing                               | 66824                | 182              | 390               | 163             | 234              | 2.14                       |
| 1418403_at                 | Adam19            | a disintegrin and metallopeptidase domain 19 (meltrin beta)  | 11492                | 114              | 245               | 506             | 478              | 2.14                       |
| 1436779_at                 | Cybb              | cytochrome b-245, beta polypeptide                           | 13058                | 118              | 253               | 92              | 122              | 2.14                       |
| 1450387_s_at               | Ak311             | adenylate kinase 3-like 1                                    | 11639                | 765              | 1632              | 1379            | 1343             | 2.13                       |
| 1418825_at                 | Irgm1             | immunity-related GTPase family M member 1                    | 15944                | 2176             | 4609              | 2973            | 2709             | 2.12                       |
| 1449875_s_at               | H2-T10            | histocompatibility 2, T region locus 10                      | 15024                | 1736             | 3686              | 1988            | 2805             | 2.12                       |
| 1452840_at                 | 1500009L16<br>Rik | RIKEN cDNA 1500009L16 gene                                   | 69784                | 303              | 640               | 556             | 519              | 2.12                       |
| 1417189_at                 | Psme2             | proteasome (prosome, macropain) 28 subunit, beta             | 19188                | 2077             | 4381              | 2302            | 2919             | 2.11                       |
| 1437087_at                 | 2210408K08<br>Rik | RIKEN cDNA 2210408K08 gene                                   | 108743               | 428              | 904               | 369             | 430              | 2.11                       |
| 1440645_at                 | BB114814          | expressed sequence BB114814                                  | 100043<br>173        | 104              | 220               | 42              | 51               | 2.11                       |
| 1418004_a_at               | Tmem176b          | transmembrane protein 176B                                   | 65963                | 3117             | 6546              | 2241            | 3602             | 2.10                       |
| 1448914_a_at               | Csfl              | colony stimulating factor 1 (macrophage)                     | 12977                | 3859             | 8122              | 3874            | 5634             | 2.10                       |
| 1455581_x_at               | Samd9l            | sterile alpha motif domain containing 9-like                 | 209086               | 895              | 1876              | 1027            | 1220             | 2.10                       |
| 1445897_s_at               | Ifi35             | interferon-induced protein 35                                | 70110                | 2914             | 6114              | 3238            | 3270             | 2.10                       |

| <b>Affymetrix<br/>Probe set ID</b> | <b>Gene symbol</b> | <b>Gene name</b>                                            | <b>Entrez<br/>Gene<br/>ID</b> | <b>Mean<br/>SMC<br/>C</b> | <b>Mean<br/>SMC<br/>TL</b> | <b>Mean<br/>EC<br/>C</b> | <b>Mean<br/>EC<br/>TL</b> | <b>Fold change<br/>SMC<br/>TL/C</b> |
|------------------------------------|--------------------|-------------------------------------------------------------|-------------------------------|---------------------------|----------------------------|--------------------------|---------------------------|-------------------------------------|
| 1421830_at                         | Ak3l1              | adenylate kinase 3-like 1                                   | 11639                         | 658                       | 1378                       | 1140                     | 1155                      | 2.09                                |
| 1444242_at                         | Slco2a1            | solute carrier organic anion transporter family, member 2a1 | 24059                         | 727                       | 1520                       | 1104                     | 1791                      | 2.09                                |
| 1451474_a_at                       | Parp8              | poly (ADP-ribose) polymerase family, member 8               | 52552                         | 105                       | 219                        | 214                      | 264                       | 2.09                                |
| 1430311_at                         | Marcks             | myristoylated alanine rich protein kinase C substrate       | 17118                         | 128                       | 266                        | 305                      | 376                       | 2.09                                |
| 1453181_x_at                       | Plscr1             | phospholipid scramblase 1                                   | 22038                         | 404                       | 842                        | 1746                     | 1758                      | 2.08                                |
| 1422754_at                         | Tmod1              | tropomodulin 1                                              | 21916                         | 172                       | 358                        | 226                      | 222                       | 2.08                                |
| 1425394_at                         | BC023105           | cDNA sequence BC023105                                      | 667597                        | 105                       | 219                        | 183                      | 173                       | 2.08                                |
| 1417429_at                         | Fmo1               | flavin containing monooxygenase 1                           | 14261                         | 329                       | 677                        | 446                      | 334                       | 2.06                                |
| 1417822_at                         | D17H6S56E-5        | DNA segment, Chr 17, human D6S56E 5                         | 110956                        | 1034                      | 2126                       | 502                      | 837                       | 2.06                                |
| 1420913_at                         | Slco2a1            | solute carrier organic anion transporter family, member 2a1 | 24059                         | 1488                      | 3067                       | 3327                     | 5254                      | 2.06                                |
| 1422528_a_at                       | Zfp3611            | zinc finger protein 36, C3H type-like 1                     | 12192                         | 576                       | 1185                       | 934                      | 1360                      | 2.06                                |
| 1435665_at                         | AI451617           | expressed sequence AI451617                                 | 209387                        | 855                       | 1761                       | 1387                     | 1483                      | 2.06                                |
| 1428660_s_at                       | Tor3a              | torsin family 3, member A                                   | 30935                         | 511                       | 1043                       | 937                      | 1120                      | 2.04                                |
| 1431095_a_at                       | Herc5              | hect domain and RLD 5                                       | 67138                         | 377                       | 767                        | 425                      | 479                       | 2.04                                |
| 1421236_at                         | Ripk2              | receptor (TNFRSF)-interacting serine-threonine kinase 2     | 192656                        | 386                       | 784                        | 440                      | 542                       | 2.03                                |
| 1416942_at                         | Erap1              | endoplasmic reticulum aminopeptidase 1                      | 80898                         | 447                       | 901                        | 323                      | 540                       | 2.02                                |
| 1419155_a_at                       | Sox4               | SRY-box containing gene 4                                   | 20677                         | 1022                      | 2061                       | 1775                     | 1738                      | 2.02                                |
| 1432478_a_at                       | Rnf19b             | ring finger protein 19B                                     | 75234                         | 201                       | 407                        | 187                      | 362                       | 2.02                                |
| 1416695_at                         | Tspo               | translocator protein                                        | 12257                         | 4453                      | 8930                       | 4691                     | 6530                      | 2.01                                |
| 1423557_at                         | Ifngr2             | interferon gamma receptor 2                                 | 15980                         | 1095                      | 2202                       | 1133                     | 1913                      | 2.01                                |
| 1427091_at                         | Znfx1              | zinc finger, NFX1-type containing 1                         | 98999                         | 370                       | 744                        | 503                      | 651                       | 2.01                                |
| 1429104_at                         | Limd2              | LIM domain containing 2                                     | 67803                         | 338                       | 680                        | 437                      | 648                       | 2.01                                |



**Table SIV.c. Gene induction in endothelial cells (EC, 24h) and in aorta SMCs.**

| Affymetrix<br>Probe set ID | Gene symbol | Gene name                                                                                      | Entrez<br>Gene<br>ID | Mean<br>SMC<br>C | Mean<br>SMC<br>TL | Mean<br>EC<br>C | Mean<br>EC<br>TL | Fold change<br>SMC<br>TL/C | Fold change<br>EC<br>TL/C |
|----------------------------|-------------|------------------------------------------------------------------------------------------------|----------------------|------------------|-------------------|-----------------|------------------|----------------------------|---------------------------|
| 1418126_at                 | Ccl5        | chemokine (C-C motif) ligand 5                                                                 | 20304                | 12               | 5264              | 26              | 1056             | 422.79                     | 40.32                     |
| 1421228_at                 | Ccl7        | chemokine (C-C motif) ligand 7                                                                 | 20306                | 21               | 2306              | 436             | 3837             | 109.43                     | 8.79                      |
| 1420380_at                 | Ccl2        | chemokine (C-C motif) ligand 2                                                                 | 20296                | 109              | 6337              | 1152            | 11645            | 58.06                      | 10.11                     |
| 1436003_at                 | Vcam1       | vascular cell adhesion molecule 1                                                              | 22329                | 101              | 2901              | 3247            | 8973             | 28.76                      | 2.76                      |
| 1427746_x_at               | H2-K1       | histocompatibility 2, K1, K region                                                             | 14972                | 488              | 9710              | 666             | 4062             | 19.92                      | 6.09                      |
| 1458299_s_at               | Nfkbie      | nuclear factor of kappa light polypeptide<br>gene enhancer in B-cells inhibitor, epsilon       | 18037                | 65               | 1162              | 150             | 1159             | 17.79                      | 7.74                      |
| 1460469_at                 | Tnfrsf9     | tumor necrosis factor receptor superfamily,<br>member 9                                        | 21942                | 47               | 704               | 446             | 1750             | 14.83                      | 3.92                      |
| 1448881_at                 | Hp          | haptoglobin                                                                                    | 15439                | 83               | 1216              | 643             | 1373             | 14.62                      | 2.14                      |
| 1435906_x_at               | Gbp2        | guanylate binding protein 2                                                                    | 14469                | 292              | 4226              | 601             | 1313             | 14.49                      | 2.19                      |
| 1423954_at                 | C3          | complement component 3                                                                         | 12266                | 501              | 7252              | 675             | 8536             | 14.47                      | 12.65                     |
| 1449195_s_at               | Cxcl16      | chemokine (C-X-C motif) ligand 16                                                              | 66102                | 97               | 1209              | 511             | 1600             | 12.43                      | 3.13                      |
| 1422962_a_at               | Psmb8       | proteasome (prosome, macropain) subunit,<br>beta type 8 (large multifunctional peptidase<br>7) | 16913                | 115              | 1421              | 272             | 789              | 12.37                      | 2.91                      |
| 1424067_at                 | Icam1       | intercellular adhesion molecule 1                                                              | 15894                | 403              | 4409              | 462             | 1456             | 10.95                      | 3.15                      |
| 1450826_a_at               | Saa3        | serum amyloid A 3                                                                              | 20210                | 94               | 1018              | 212             | 2037             | 10.87                      | 9.63                      |
| 1427747_a_at               | Lcn2        | lipocalin 2                                                                                    | 16819                | 334              | 3531              | 1101            | 2798             | 10.58                      | 2.54                      |
| 1422562_at                 | Rrad        | Ras-related associated with diabetes                                                           | 56437                | 26               | 261               | 191             | 454              | 10.13                      | 2.39                      |
| 1424948_x_at               | H2-K1       | histocompatibility 2, K1, K region                                                             | 14972                | 420              | 3626              | 478             | 1536             | 8.62                       | 3.22                      |
| 1431843_a_at               | Nfkbie      | nuclear factor of kappa light polypeptide<br>gene enhancer in B-cells inhibitor, epsilon       | 18037                | 51               | 433               | 94              | 439              | 8.46                       | 4.68                      |
| 1425902_a_at               | Nfkb2       | nuclear factor of kappa light polypeptide<br>gene enhancer in B-cells 2, p49/p100              | 18034                | 159              | 1277              | 325             | 1175             | 8.05                       | 3.61                      |
| 1419463_at                 | Clca2       | chloride channel calcium activated 2                                                           | 80797                | 456              | 3650              | 310             | 1142             | 8.00                       | 3.69                      |
| 1424270_at                 | Dclk1       | doublecortin-like kinase 1                                                                     | 13175                | 133              | 1061              | 240             | 1090             | 7.97                       | 4.55                      |
| 1418718_at                 | Cxcl16      | chemokine (C-X-C motif) ligand 16                                                              | 66102                | 248              | 1857              | 853             | 2486             | 7.49                       | 2.92                      |
| 1426324_at                 | H2-K1       | histocompatibility 2, K1, K region                                                             | 14972                | 95               | 699               | 230             | 516              | 7.35                       | 2.25                      |
| 1435940_at                 | Dclk1       | doublecortin-like kinase 1                                                                     | 13175                | 153              | 1077              | 386             | 1177             | 7.06                       | 3.05                      |
| 1437932_a_at               | Cldn1       | claudin 1                                                                                      | 12737                | 40               | 269               | 72              | 316              | 6.73                       | 4.42                      |
| 1448306_at                 | Nfkbia      | nuclear factor of kappa light polypeptide<br>gene enhancer in B-cells inhibitor, alpha         | 18035                | 899              | 5959              | 1382            | 4255             | 6.63                       | 3.08                      |
| 1426063_a_at               | Gem         | GTP binding protein (gene overexpressed in<br>skeletal muscle)                                 | 14579                | 59               | 387               | 212             | 581              | 6.57                       | 2.75                      |

| Affymetrix<br>Probe set ID | Gene symbol | Gene name                                                                           | Entrez<br>Gene<br>ID | Mean<br>SMC<br>C | Mean<br>SMC<br>TL | Mean<br>EC<br>C | Mean<br>EC<br>TL | Fold change<br>SMC<br>TL/C | Fold change<br>EC<br>TL/C |
|----------------------------|-------------|-------------------------------------------------------------------------------------|----------------------|------------------|-------------------|-----------------|------------------|----------------------------|---------------------------|
| 1449731_s_at               | Nfkbia      | nuclear factor of kappa light polypeptide gene enhancer in B-cells inhibitor, alpha | 18035                | 1468             | 8389              | 2128            | 5325             | 5.72                       | 2.50                      |
| 1451289_at                 | Dclk1       | doublecortin-like kinase 1                                                          | 13175                | 432              | 2457              | 638             | 2620             | 5.69                       | 4.11                      |
| 1424271_at                 | Dclk1       | doublecortin-like kinase 1                                                          | 13175                | 845              | 4592              | 1238            | 4498             | 5.44                       | 3.63                      |
| 1436659_at                 | Dclk1       | doublecortin-like kinase 1                                                          | 13175                | 1350             | 6823              | 2166            | 7236             | 5.05                       | 3.34                      |
| 1425336_x_at               | H2-K1       | histocompatibility 2, K1, K region                                                  | 14972                | 2371             | 11783             | 3373            | 8493             | 4.97                       | 2.52                      |
| 1421392_a_at               | Birc3       | baculoviral IAP repeat-containing 3                                                 | 11796                | 420              | 2072              | 650             | 1979             | 4.93                       | 3.05                      |
| 1433699_at                 | Tnfaip3     | tumor necrosis factor, alpha-induced protein 3                                      | 21929                | 493              | 2313              | 1069            | 2518             | 4.69                       | 2.36                      |
| 1460407_at                 | Spib        | Spi-B transcription factor (Spi-1/PU.1 related)                                     | 272382               | 83               | 377               | 93              | 607              | 4.52                       | 6.53                      |
| 1448898_at                 | Ccl9        | chemokine (C-C motif) ligand 9                                                      | 20308                | 455              | 2050              | 1943            | 5487             | 4.50                       | 2.82                      |
| 1451683_x_at               | H2-K1       | histocompatibility 2, K1, K region                                                  | 14972                | 947              | 4253              | 1171            | 2674             | 4.49                       | 2.28                      |
| 1451931_x_at               | H2-L        | histocompatibility 2, D region                                                      | 14980                | 1626             | 7035              | 2345            | 4802             | 4.33                       | 2.05                      |
| 1438157_s_at               | Nfkbia      | nuclear factor of kappa light polypeptide gene enhancer in B-cells inhibitor, alpha | 18035                | 2805             | 11814             | 3829            | 8679             | 4.21                       | 2.27                      |
| 1450829_at                 | Tnfaip3     | tumor necrosis factor, alpha-induced protein 3                                      | 21929                | 138              | 561               | 323             | 659              | 4.07                       | 2.04                      |
| 1427760_s_at               | Prl2c2      | prolactin family 2, subfamily c, member 2                                           | 18811                | 122              | 491               | 1990            | 6859             | 4.01                       | 3.45                      |
| 1450165_at                 | Slfn2       | schlafen 2                                                                          | 20556                | 114              | 456               | 690             | 1553             | 4.00                       | 2.25                      |
| 1417936_at                 | Ccl9        | chemokine (C-C motif) ligand 9                                                      | 20308                | 870              | 3400              | 3306            | 8829             | 3.91                       | 2.67                      |
| 1450863_a_at               | Dclk1       | doublecortin-like kinase 1                                                          | 13175                | 424              | 1569              | 754             | 2001             | 3.70                       | 2.65                      |
| 1450534_x_at               | H2-K1       | histocompatibility 2, K1, K region                                                  | 14972                | 223              | 812               | 329             | 722              | 3.64                       | 2.20                      |
| 1438658_a_at               | S1pr3       | sphingosine-1-phosphate receptor 3                                                  | 13610                | 136              | 474               | 880             | 2705             | 3.48                       | 3.07                      |
| 1417130_s_at               | Angptl4     | angiopoietin-like 4                                                                 | 57875                | 407              | 1406              | 1965            | 4326             | 3.46                       | 2.20                      |
| 1449133_at                 | Sprr1a      | small proline-rich protein 1A                                                       | 20753                | 227              | 784               | 2420            | 6463             | 3.45                       | 2.67                      |
| 1450378_at                 | Tapbp       | TAP binding protein                                                                 | 21356                | 808              | 2624              | 711             | 1451             | 3.25                       | 2.04                      |
| 1417788_at                 | Snca        | synuclein, gamma                                                                    | 20618                | 100              | 308               | 476             | 1061             | 3.08                       | 2.23                      |
| 1421074_at                 | Cyp7b1      | cytochrome P450, family 7, subfamily b, polypeptide 1                               | 13123                | 84               | 256               | 353             | 837              | 3.05                       | 2.37                      |
| 1421812_at                 | Tapbp       | TAP binding protein                                                                 | 21356                | 2747             | 8306              | 2582            | 5254             | 3.02                       | 2.03                      |
| 1423125_at                 | Dclk1       | doublecortin-like kinase 1                                                          | 13175                | 162              | 459               | 209             | 472              | 2.83                       | 2.26                      |
| 1418854_at                 | Birc2       | baculoviral IAP repeat-containing 2                                                 | 11797                | 1011             | 2824              | 1064            | 2948             | 2.79                       | 2.77                      |
| 1420089_at                 | Nfkbia      | nuclear factor of kappa light polypeptide gene enhancer in B-cells inhibitor, alpha | 18035                | 336              | 881               | 260             | 537              | 2.63                       | 2.07                      |

| <b>Affymetrix<br/>Probe set ID</b> | <b>Gene symbol</b> | <b>Gene name</b>                                                | <b>Entrez<br/>Gene<br/>ID</b> | <b>Mean<br/>SMC<br/>C</b> | <b>Mean<br/>SMC<br/>TL</b> | <b>Mean<br/>EC<br/>C</b> | <b>Mean<br/>EC<br/>TL</b> | <b>Fold change<br/>SMC<br/>TL/C</b> | <b>Fold change<br/>EC<br/>TL/C</b> |
|------------------------------------|--------------------|-----------------------------------------------------------------|-------------------------------|---------------------------|----------------------------|--------------------------|---------------------------|-------------------------------------|------------------------------------|
| 1437451_at                         | 1110006O17<br>Rik  | RIKEN cDNA 1110006O17 gene                                      | 68545                         | 135                       | 346                        | 154                      | 434                       | 2.56                                | 2.83                               |
| 1425154_a_at                       | Csf1               | colony stimulating factor 1 (macrophage)                        | 12977                         | 1057                      | 2485                       | 1217                     | 2457                      | 2.35                                | 2.02                               |
| 1417821_at                         | D17H6S56E-<br>5    | DNA segment, Chr 17, human D6S56E 5                             | 110956                        | 710                       | 1502                       | 247                      | 549                       | 2.12                                | 2.22                               |
| 1450014_at                         | Cldn1              | claudin 1                                                       | 12737                         | 106                       | 224                        | 111                      | 234                       | 2.11                                | 2.10                               |
| 1438081_at                         | Mcc                | mutated in colorectal cancers                                   | 328949                        | 279                       | 581                        | 247                      | 521                       | 2.08                                | 2.11                               |
| 1418587_at                         | Traf3              | Tnf receptor-associated factor 3                                | 22031                         | 1208                      | 2500                       | 717                      | 1507                      | 2.07                                | 2.10                               |
| 1419417_at                         | Vegfc              | vascular endothelial growth factor C                            | 22341                         | 67                        | 136                        | 514                      | 2234                      | 2.04                                | 4.35                               |
| 1448136_at                         | Enpp2              | ectonucleotide<br>pyrophosphatase/phosphodiesterase 2           | 18606                         | 705                       | 1439                       | 422                      | 1658                      | 2.04                                | 3.93                               |
| 1434905_at                         | Ndufa4l2           | NADH dehydrogenase (ubiquinone) 1 alpha<br>subcomplex, 4-like 2 | 407790                        | 354                       | 713                        | 696                      | 1512                      | 2.02                                | 2.17                               |

**Tabl. SV. Presumptive LTO genes in SMCs constitutively expressed or induced by TNF,  $\alpha$ -LT $\beta$ R, and TNF +  $\alpha$ -LT $\beta$ R**

| Gene Molecule | Function                   | References                  |
|---------------|----------------------------|-----------------------------|
| LT $\beta$ R  | LTO                        | <sup>3,4</sup> , this study |
| CXCL12        | LTO                        | <sup>4,5</sup> , this study |
| CXCL13        | LTO, B cell homing         | <sup>4,6</sup> , this study |
| CCL19         | LTO, T cell homing         | <sup>4,5</sup> , this study |
| ICAM-1        | LTO, adhesion              | <sup>4</sup> , this study   |
| VCAM-1        | LTO, adhesion              | <sup>4</sup> , this study   |
| CCL2          | Monocyte homing            | <sup>7</sup> , this study   |
| CCL5          | Monocyte and T cell homing | <sup>7</sup> , this study   |
| CCL7          | Monocyte homing            | this study                  |
| CCL9          | DC and monocyte homing     | this study                  |
| CXCL1         | Monocyte homing            | <sup>8</sup> , this study   |
| CXCL10        | T cell homing              | <sup>8</sup> , this study   |
| CXCL16        | Monocyte and T cell homing | <sup>8</sup> , this study   |
| CX3CL1        | Adhesion                   | <sup>7,8</sup> , this study |
| CXCR7         | CXCL12 binding             | <sup>9</sup> , this study   |

## References

1. Grabner R, Lotzer K, Dopping S, Hildner M, Radke D, Beer M, Spanbroek R, Lippert B, Reardon CA, Getz GS, Fu YX, Hehlhans T, Mebius RE, van der Wall M, Kruspe D, Englert C, Lovas A, Hu D, Randolph GJ, Weih F, Habenicht AJ. Lymphotoxin beta receptor signaling promotes tertiary lymphoid organogenesis in the aorta adventitia of aged ApoE<sup>-/-</sup> mice. *J Exp Med*. 2009;206:233-248.
2. Guo F, Weih D, Meier E, Weih F. Constitutive alternative NF-kappaB signaling promotes marginal zone B-cell development but disrupts the marginal sinus and induces HEV-like structures in the spleen. *Blood*. 2007;110:2381-2389.
3. Futterer A, Mink K, Luz A, Kosco-Vilbois MH, Pfeffer K. The lymphotoxin beta receptor controls organogenesis and affinity maturation in peripheral lymphoid tissues. *Immunity*. 1998;9:59-70.
4. Mebius RE. Organogenesis of lymphoid tissues. *Nat Rev Immunol*. 2003;3:292-303.
5. Luther SA, Bidgol A, Hargreaves DC, Schmidt A, Xu Y, Paniyadi J, Matloubian M, Cyster JG. Differing activities of homeostatic chemokines CCL19, CCL21, and CXCL12 in lymphocyte and dendritic cell recruitment and lymphoid neogenesis. *J Immunol*. 2002;169:424-433.
6. Tumanov AV, Grivennikov SI, Shakhov AN, Rybtsov SA, Koroleva EP, Takeda J, Nedospasov SA, Kuprash DV. Dissecting the role of lymphotoxin in lymphoid organs by conditional targeting. *Immunol Rev*. 2003;195:106-116.
7. Schober A. Chemokines in vascular dysfunction and remodeling. *Arterioscler Thromb Vasc Biol*. 2008;28:1950-1959.
8. Zerneck A, Shagdarsuren E, Weber C. Chemokines in atherosclerosis: an update. *Arterioscler Thromb Vasc Biol*. 2008;28:1897-1908.

9. Sierro F, Biben C, Martinez-Munoz L, Mellado M, Ransohoff RM, Li M, Woehl B, Leung H, Groom J, Batten M, Harvey RP, Martinez AC, Mackay CR, Mackay F. Disrupted cardiac development but normal hematopoiesis in mice deficient in the second CXCL12/SDF-1 receptor, CXCR7. *Proc Natl Acad Sci U S A*. 2007;104:14759-14764.
